# Supplementary material for: Influence of shift work on cardiovascular disease risk in Southern African long-distance truck drivers: a cross-sectional study
Source: PubMed Central journal article supplement — BMJ Open. 2022 Apr 13;12(4):e050645. doi: 10.1136/bmjopen-2021-050645 (PMC9013993; doi:10.1136/bmjopen-2021-050645), 2022-04-13
Supplement: bmjopen-2021-050645.draft_revisions.pdf [file bmjopen-2021-050645.draft_revisions.pdf]

# BMJ Open

BMJ Open is committed to open peer review. As part of this commitment we make the peer review history of every article we publish publicly available.

When an article is published we post the peer reviewers' comments and the authors' responses online. We also post the versions of the paper that were used during peer review. These are the versions that the peer review comments apply to.

The versions of the paper that follow are the versions that were submitted during the peer review process. They are not the versions of record or the final published versions. They should not be cited or distributed as the published version of this manuscript.

BMJ Open is an open access journal and the full, final, typeset and author-corrected version of record of the manuscript is available on our site with no access controls, subscription charges or pay-per-view fees (<http://bmjopen.bmj.com>).

If you have any questions on BMJ Open's open peer review process please email [info.bmjopen@bmj.com](mailto:info.bmjopen@bmj.com)

# BMJ Open

## The influence of shift work on cardiovascular disease risk in Southern African long-distance truck drivers: A cross-sectional study

|                               |                                                                                                                                                                                                                                                                                                                                                                                                                                                                                                                                                                                                                                                                                                                                                                                                                                                                                                                                                                                                                                                                                    |
|-------------------------------|------------------------------------------------------------------------------------------------------------------------------------------------------------------------------------------------------------------------------------------------------------------------------------------------------------------------------------------------------------------------------------------------------------------------------------------------------------------------------------------------------------------------------------------------------------------------------------------------------------------------------------------------------------------------------------------------------------------------------------------------------------------------------------------------------------------------------------------------------------------------------------------------------------------------------------------------------------------------------------------------------------------------------------------------------------------------------------|
| Journal:                      | <i>BMJ Open</i>                                                                                                                                                                                                                                                                                                                                                                                                                                                                                                                                                                                                                                                                                                                                                                                                                                                                                                                                                                                                                                                                    |
| Manuscript ID                 | bmjopen-2021-050645                                                                                                                                                                                                                                                                                                                                                                                                                                                                                                                                                                                                                                                                                                                                                                                                                                                                                                                                                                                                                                                                |
| Article Type:                 | Original research                                                                                                                                                                                                                                                                                                                                                                                                                                                                                                                                                                                                                                                                                                                                                                                                                                                                                                                                                                                                                                                                  |
| Date Submitted by the Author: | 27-Feb-2021                                                                                                                                                                                                                                                                                                                                                                                                                                                                                                                                                                                                                                                                                                                                                                                                                                                                                                                                                                                                                                                                        |
| Complete List of Authors:     | <p>Draaijer, Melvin; Amsterdam UMC Locatie VUmc, Department of Global Health</p> <p>Scheuermaier, Karine; University of the Witwatersrand Faculty of Health Sciences, Wits Sleep Laboratory, Brain Function Research Group, School of Physiology</p> <p>Lalla-Edward, Samanta Tresha; University of the Witwatersrand Faculty of Health Sciences, Ezintsha, a sub-division of Wits Reproductive Health and HIV Institute</p> <p>Fischer, Alex; University of the Witwatersrand Faculty of Health Sciences, Ezintsha, a sub-division of Wits Reproductive Health and HIV Institute</p> <p>Grobbee, Diederick; Julius Center for Health Sciences and Primary Care, Global Health Unit</p> <p>Venter, Francois; University of the Witwatersrand Faculty of Health Sciences, Ezintsha, a sub-division of Wits Reproductive Health and HIV Institute</p> <p>Vos, Alinda; Julius Center for Health Sciences and Primary Care, Global Health Unit; University of the Witwatersrand Faculty of Health Sciences, Ezintsha, a sub-division of Wits Reproductive Health and HIV Institute</p> |
| Keywords:                     | Coronary heart disease < CARDIOLOGY, Risk management < HEALTH SERVICES ADMINISTRATION & MANAGEMENT, OCCUPATIONAL & INDUSTRIAL MEDICINE, PUBLIC HEALTH                                                                                                                                                                                                                                                                                                                                                                                                                                                                                                                                                                                                                                                                                                                                                                                                                                                                                                                              |
|                               |                                                                                                                                                                                                                                                                                                                                                                                                                                                                                                                                                                                                                                                                                                                                                                                                                                                                                                                                                                                                                                                                                    |

SCHOLARONE™  
Manuscripts

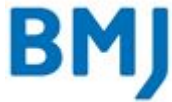

I, the Submitting Author has the right to grant and does grant on behalf of all authors of the Work (as defined in the below author licence), an exclusive licence and/or a non-exclusive licence for contributions from authors who are: i) UK Crown employees; ii) where BMJ has agreed a CC-BY licence shall apply, and/or iii) in accordance with the terms applicable for US Federal Government officers or employees acting as part of their official duties; on a worldwide, perpetual, irrevocable, royalty-free basis to BMJ Publishing Group Ltd ("BMJ") its licensees and where the relevant Journal is co-owned by BMJ to the co-owners of the Journal, to publish the Work in this journal and any other BMJ products and to exploit all rights, as set out in our [licence](#).

The Submitting Author accepts and understands that any supply made under these terms is made by BMJ to the Submitting Author unless you are acting as an employee on behalf of your employer or a postgraduate student of an affiliated institution which is paying any applicable article publishing charge ("APC") for Open Access articles. Where the Submitting Author wishes to make the Work available on an Open Access basis (and intends to pay the relevant APC), the terms of reuse of such Open Access shall be governed by a Creative Commons licence – details of these licences and which [Creative Commons](#) licence will apply to this Work are set out in our licence referred to above.

Other than as permitted in any relevant BMJ Author's Self Archiving Policies, I confirm this Work has not been accepted for publication elsewhere, is not being considered for publication elsewhere and does not duplicate material already published. I confirm all authors consent to publication of this Work and authorise the granting of this licence.

1  
2  
3  
4  
5  
6  
7  
8  
9  
10  
11  
12

## The influence of shift work on cardiovascular disease risk in Southern African long-distance truck drivers: A cross-sectional study

13 M. Draaijer<sup>1</sup>, MD, K. Scheuermeier<sup>2</sup>, MD, MMSc, S.T. Lalla-Edward<sup>3</sup>, PhD, A Fischer<sup>3</sup>, MPH,  
14 D.E. Grobbee<sup>4</sup>, MD, PhD, W.D.F. Venter<sup>3</sup>, MD, PhD, FCP (SA), A.G. Vos<sup>3,4</sup>, MD, PhD

15  
16  
17  
18 <sup>1</sup>Amsterdam University Medical Centers, Location VU Medical Center, Department of Global  
19 Health, Vrije Universiteit, Amsterdam, The Netherlands

20  
21  
22 <sup>2</sup> Wits Sleep Laboratory, Brain Function Research Group, School of Physiology, Faculty of Health  
23 Sciences, University of Witwatersrand, Johannesburg, South Africa

24  
25  
26  
27 <sup>3</sup> Ezintsha, a sub-division of Wits Reproductive Health and HIV Institute, University of  
28 Witwatersrand, Johannesburg, South Africa

29  
30  
31 <sup>4</sup>Julius Global Health, Julius Center for Health Sciences and Primary Care, University Medical  
32 Center Utrecht, Utrecht University, Utrecht, The Netherland

33  
34  
35  
36 Corresponding author:

37  
38 Alinda G. Vos

39  
40  
41 Address: Universiteitsweg 100, 3584 CG Utrecht. Fax: +31 88 75 68099.

42  
43  
44 Email: [a.g.vos-8@umcutrecht.nl](mailto:a.g.vos-8@umcutrecht.nl)

45  
46  
47 Phone: +31643747335

48  
49  
50 **Word count**

51  
52  
53 Manuscript excluding title page, abstract, acknowledgements, tables and references:  
54 2331 words

1  
2  
3 **Keywords**  
4

5 South-Africa, cardiovascular risk factors, Framingham risk score, Atherosclerotic  
6 Cardiovascular Disease risk, Left Ventricular Hypertrophy, Carotid Intima-Media  
7 Thickness  
8  
9

10  
11 **Number of figures and tables**  
12

13  
14 Number of tables in manuscript: 2  
15

16  
17 Number of tables in appendix: 4  
18  
19  
20  
21  
22  
23  
24  
25  
26  
27  
28  
29  
30  
31  
32  
33  
34  
35  
36  
37  
38  
39  
40  
41  
42  
43  
44  
45  
46  
47  
48  
49  
50  
51  
52  
53  
54  
55  
56  
57  
58  
59  
60

For peer review only

## Abstract

### Objectives:

Cardiovascular disease (CVD) is a major problem globally. Truck drivers have an increased risk of CVD due to a sedentary lifestyle, irregular working hours and behavioral choices. We aimed to get insight into the contribution of night shift work to CVD risk in long-distance truck drivers in South Africa.

### Design:

A cross-sectional study was performed.

### Setting:

Enrollment took place at three South African truck stop locations in two provinces; Bloemfontein (Free State), Pomona Road (Gauteng), and Soweto (Gauteng).

### Participants:

607 males aged 18 years and older with full-time employment as a long-distance truck driver were included. The criteria for inclusion were willingness and being able to provide informed consent and to complete the study procedures.

### Primary and secondary outcome measures:

Information was collected on socio-demographics, occupational and health characteristics. Besides, physical measurements, an electrocardiogram (ECG), and carotid intima-media thickness (CIMT) measurements were taken. A night shift was defined as working between 10pm and 6am. CVD risk was defined with the Framingham Risk Score (FRS), the Atherosclerotic Cardiovascular Disease (ASCVD) risk algorithm, left ventricular hypertrophy (LVH), and CIMT.

### Results:

In total, 607 truck drivers were included, of which 305 (50.2%) worked in day shifts only and 302 (49.8%) worked day and night shifts. There was a high prevalence of CVD risk factors in both groups as 33% were hypertensive, 28% obese and 37% had abnormal

lipid levels. Working day and night shifts compared to working only day shifts did not result in differences in FRS, ASCVD risk, or LVH. No difference was found in CIMT measurements, except for the maximum bulb thickness which was higher in day shift workers.

### Conclusions:

CVD risk factors are considerably present in male truck drivers in South Africa. CVD risk does not differ between dayshift and day-night shift workers in this cross-sectional analysis.

### Article summary

#### Strengths and limitations of this study

- With 607 included participants this is the largest cohort of male truck drivers in South Africa and to our knowledge possibly the largest in Africa.
- We collected a wide variation of characteristics combined with physical measurements, ECG and carotid measurements.
- We defined our outcome of cardiovascular disease risk in multiple ways, making our outcomes more reliable.
- The definition of night shift work is varying throughout literature, to account for this we did additional sensitivity analyses using different cut-offs for the number of nights.

#### Study approval

The study was approved by the Human Research Ethics Committee (Medical) of the University of Witwatersrand (reference number M160760).

## Introduction

Cardiovascular disease (CVD) is the number one cause of death and a leading cause of disability globally. An estimated 17.9 million people died of CVD in 2016, 31% of all global deaths<sup>[1,2]</sup>. Over 75% of CVD events occur in low- and middle-income countries<sup>[3]</sup>. In South Africa, CVD is responsible for approximately 20% of all deaths, making it is the second leading cause of death after HIV<sup>[4,5]</sup>. The cause of CVD is multifactorial and includes behavioral factors such as smoking, physical inactivity, unhealthy dietary patterns and lifestyle related conditions such as high cholesterol, high blood pressure, and high body mass index<sup>[6]</sup>.

Truck drivers are a high risk population for CVD by virtue of their occupation with long working hours, frequent shift work and low physical activity. There is a high prevalence of risk factors contributing to CVD in truck drivers in South Africa such as smoking, obesity, hypercholesterolemia, hypertension, and abnormal glucose levels<sup>[7,8]</sup>.

Irregular working hours and night shifts are risk factors for CVD; exposure to shift work for 5 years has been associated with a 7% increased CVD risk<sup>[9]</sup>. A possible reason for the increase in CVD risk may be circadian misalignment. Circadian misalignment reflects a non-optimal scheduling of behavioral and environmental cycles such as sleep/wake, fasting/feeding, rest/activity, dark/light cycles, with respect to endogenous biological processes governed by the circadian system, such as blood pressure, hormones, and inflammation factors<sup>[10]</sup>.

This study aims to gain insight into the contribution of night shift work to CVD risk in long-distance truck drivers in South Africa by comparing truck drivers who work day shifts only to truck drivers who work day and night shifts.



## Methods

### Study design and setting

The Trucker Health Survey was an initiative of the Wits Reproductive Health and HIV Institute (Wits RHI), a department of the University of the Witwatersrand, and North-Star Alliance (NSA). NSA provided health care services to truck drivers<sup>[11]</sup>. Methods and characteristics of the study have been described previously<sup>[12]</sup>. Enrollment took place between October 2016 and March 2017 in three South African locations in two provinces; Bloemfontein (Free State), Pomona Road (Gauteng), and Soweto (Gauteng). The truck stop in Soweto was added from January to March 2017 to reach a sufficient number of South African participants. Information was collected during a single visit.

The study was approved by the Research Ethics Committee of the University of the Witwatersrand (reference number M160760). Participation was voluntary, and informed consent was obtained by a research nurse or counselor who spoke the same language as the participant.

### Study population and inclusion criteria

Males aged 18 years and older with full-time employment as a long-distance truck driver were included. The criteria for inclusion were willingness and being able to provide informed consent and to complete the study procedures. All participants with data on shift work available were eligible for this analysis.

### Patient and Public involvement statement

Patients and the public were not involved in the study design, or in the recruitment to, and conduct of the study. Results cannot be disseminated to study participants directly due to insufficient contact information.

## Evaluation

Information on socio-demographic (i.e., age, education, country of origin, marital status), occupational (i.e., time spent working, working night shifts) and behavioral/health (i.e. smoking status, physical activity, sleep duration per day, HIV status) characteristics were collected using validated questionnaires<sup>[13–16]</sup>. The main definition for night shifts was working at least three hours once a week between 10pm and 6am, the remaining was defined as dayshift workers. Night shift truck drivers worked either one night shift a week, two to three night shift a week or more than four night shifts a week. We used those different cut-offs in a sensitivity analysis to investigate whether an increased number of nights shifts would be associated with increased CVD risk.

CVD risk was defined with four different outcome measures namely the Framingham Risk Score (FRS), the Atherosclerotic Cardiovascular Disease (ASCVD) risk algorithm, left ventricular hypertrophy (LVH) on electrocardiogram (ECG) and carotid intima-media thickness (CIMT).

Physical measurements included measurement of blood pressure, waist and hip circumference, height and weight. Blood was collected for measurement of total cholesterol, high-density-lipoprotein (HDL) cholesterol, low-density-lipoprotein (LDL) cholesterol, triglycerides (TG), random glucose and creatinine. Blood pressure was categorized as normal, pre-hypertension and hypertension<sup>[17]</sup>. Cut-off points for glucose and cholesterol were chosen according to international guidelines<sup>[18,19]</sup>. Estimated glomerular filtration rate (eGFR) was calculated using creatinine levels and presented in stages of chronic kidney disease<sup>[20]</sup>.

CVD risk according to the FRS was calculated for participants without CVD at baseline and categorized in low-, intermediate- and high-CVD risk<sup>[21,22]</sup>. The ASCVD risk algorithm was calculated for participants between the age of 40 to 70 according to algorithm guidelines<sup>[19,23]</sup>.

1  
2  
3 A standard 12 lead ECG was performed by a trained nurse with a computer-based ECG  
4 device (SE-1515 DP12, EDAN)<sup>[24]</sup> to record heart rate, rhythm and conduction time. LVH  
5 was assessed using Cornell's voltage ( $RaVL+SV_3$ ), Cornell's product ( $(RaVL+SV_3) \times$  QRS  
6 duration) and Sokolow-Lyon's voltage ( $SV_1+RV_5$ ). LVH was defined as Cornell's voltage  $\geq$   
7 28mV, Cornell's product  $> 2440$  mV·ms or Sokolow-Lyon's voltage  $\geq 35$ mV<sup>[25–28]</sup>. The  
8 combined outcome of LVH was deemed positive if one or more criteria indicated LVH.  
9  
10  
11  
12  
13  
14

15 CIMT was measured in 217 (42.9%) participants, dependent on the availability of a  
16 sonographer. A Siemens Acuson p500 ultrasound (Siemens Healthcare (Pty) Ltd, South  
17 Africa) with a  $\geq 7$ MHz linear probe was used. Measurements of the near wall and the far  
18 wall of the common carotid artery (CCA) were taken at three standardized angles each  
19 side using the Meijer's Arc<sup>[29]</sup>. At bulb level, the far wall was measured at the best visible  
20 angle at both sides. The images were analyzed off-line in batch with the semi-  
21 automatically Artery Measurement System software (Chalmers University, Göteborg,  
22 Sweden). The mean of the mean common carotid artery intima-media thickness (CCA-  
23 IMT) and the max of the mean CCA-IMT were calculated by averaging the near and far  
24 wall measurements across the three angles on both sides. Mean-max bulb IMT was  
25 calculated using bilateral measurements of the bulb far wall. A mean CCA-IMT of  $> 1.0$ mm  
26 at any of the measured angles was considered a carotid plaque<sup>[30,31]</sup>.  
27  
28  
29  
30  
31  
32  
33  
34  
35  
36  
37  
38  
39  
40

### 41 **Statistical analysis**

42  
43 Analyses were done using SPSS version 25.0 (SPSS Inc. Chicago, IL, USA). A  $p \leq 0.05$  was  
44 considered to be statistically significant. Categorical variables were represented as counts  
45 with percentages. All continuous outcomes were non-normally distributed and  
46 summarized using median with interquartile range (IQR). To test for differences between  
47 day and night shift workers a Chi-square test was used for categorical variables and a  
48 Mann-Whitney-U test was used for continuous variables. Linear regression for FRS,  
49 ASCVD risk and mean CCA-IMT was done after transformation to meet criteria for normal  
50  
51  
52  
53  
54  
55  
56  
57  
58  
59  
60

1  
2  
3 distribution. Binomial logistic regression was used to assess the influence of night shift  
4 work on the occurrence of LVH. Variables considered as confounders for all outcomes  
5 were age, country of origin, education level and relationship status. We did not adjust for  
6 known CVD risk factors as our outcomes represent the cumulative effect of CVD risk  
7 factors. The aim is to investigate CVD risk differences between the groups, and not the  
8 contribution of individual CVD risk factors to our endpoints. Variables were included in  
9 multivariable analysis if the p-value was  $\leq 0.20$  in univariable analysis. Age was added to  
10 the multivariable model independent of the p-value in univariable analysis.  
11  
12  
13  
14  
15  
16  
17

18  
19 In a sensitivity analysis, above described analyses were repeated using different cut-off  
20 points for night shift work. Finally, all analyses were repeated including only truck drivers  
21 who had been working as a truck driver for more than 10 years (n = 229 out of 607).  
22  
23  
24  
25  
26  
27

## 28 Results

29  
30  
31 In total, 607 (99%) male truck drivers had data on shift work available and were included,  
32 of which 305 (50.2%) worked in day shifts only and 302 (49.8%) worked both day and  
33 night shifts (Table 1).  
34  
35  
36

37  
38 There were no drivers who only worked night shifts. The median age was 37 (IQR: 31-42)  
39 years. The majority of the drivers were from Zimbabwe (62.5%), followed by South Africa  
40 (20.2%). The drivers had worked for a median duration of 9 (IQR: 5-14) years as a truck  
41 driver. There was a high prevalence of CVD risk factors in both groups as 28% of  
42 participants were obese, 33% hypertensive and >35% had abnormal LDL and TG levels.  
43  
44 No significant differences were seen between the groups for most of the CVD risk factors.  
45  
46 The day-night shift group had a higher activity score ( $p = 0.02$ ), higher neck circumference  
47 ( $p < 0.01$ ) and a lower waist to hip ratio ( $p = 0.03$ ) than the participants who worked day  
48 shifts only.  
49  
50  
51  
52  
53  
54  
55  
56  
57  
58  
59  
60

1  
2  
3 Shift work was borderline associated with a difference in FRS ( $p = 0.05$ ) as continuous  
4 outcome, but there was no difference between the groups when categorized in low,  
5 intermediate and high risk ( $p = 0.57$ ).  
6  
7

8  
9 Shift work was not associated with ASCVD risk score ( $p = 0.94$ ), LVH occurrence (all  $p >$   
10  $0.20$ ) or CIMT, except for max bulb IMT, which was higher in day shift workers compared  
11 to day-night shift workers ( $p < 0.01$ ) (Table 2).  
12  
13  
14

15  
16 Factors associated with higher FRS and ASCVD in multivariable analysis were increasing  
17 age ( $p < 0.01$  for both), having finished primary school or less ( $p = 0.01$  and  $p < 0.01$   
18 respectively), and a stable relationship ( $p < 0.01$  for both). An increase in age ( $p < 0.01$ )  
19 was associated with an increase in mean CCA-IMT. A stable relationship was positively  
20 associated with LVH ( $p < 0.01$ ) (Appendix 1).  
21  
22  
23  
24

25  
26 Repeating the analysis using different cut-offs for night shift work resulted in the same  
27 findings. Limiting the analysis to truck drivers who had been working as a truck driver for  
28 more than 10 years ( $n=229$ ) did also not show a difference in CVD outcomes between day  
29 and day/night shift workers.  
30  
31  
32  
33

## 34 Discussion

35  
36 Our study provides insight into the role of shift work on CVD risk in truck drivers in South  
37 Africa and possibly sub-Saharan Africa. We did not find an association between shift work  
38 and CVD risk according to the FRS strata, the ASCVD risk score, LVH, and CIMT.  
39  
40  
41  
42

43  
44 Our results are in line with recent studies done in cohorts of hospital workers. A study  
45 including female hospital employees showed that shiftwork was not directly linked to CVD  
46 risk<sup>[32]</sup>. Another study on health care workers employed in hospitals found no difference  
47 in metabolic risk factors between day and night shift workers<sup>[33]</sup>. Similar results were seen  
48 in a Finnish cohort study with a 20-year follow-up period as no association between shift  
49 work and cardiovascular morbidity was observed<sup>[34]</sup>.  
50  
51  
52  
53  
54  
55  
56  
57  
58  
59  
60

1  
2  
3 However, there are studies, mainly including health care professionals, which did find an  
4 increased CVD risk for night shift workers. One study found that shift work for more than  
5 five years has a positive and significant dose-response relationship on CVD risk. Shift work  
6 less than five years did not have a relation with CVD risk<sup>[9]</sup>. When we included only drivers  
7 who worked in night shifts for more than ten years, we did still not find an association  
8 between shift work and CVD risk. A reason might be that hospital workers in general work  
9 more hours during a night shift, and hence more circadian misalignment, than long  
10 distance truck drivers.  
11  
12  
13  
14  
15  
16  
17  
18

19 Our findings on the abundance of CVD risk factors are in line with other studies that  
20 showed that CVD risk factors are notably present in truck drivers<sup>[35,36]</sup>. In the South  
21 African Demographic and Health Survey including almost 14.000 participants with a mean  
22 age of 38.5 years, the overall prevalence of hypertension was 30% and the prevalence of  
23 obesity was 20%<sup>[37]</sup>. In a population study in the northern part of South Africa, including  
24 3641 participants (64% males, median age <30 years) 30% of the men had hypertension,  
25 5% were obese and up to 20% had disturbances in lipid levels<sup>[38]</sup>.  
26  
27  
28  
29  
30  
31  
32

33 In our population the mean age was 37.6 years. Hypertension occurred in 33% of the  
34 participants, and 28% was obese. In our study up to 37% of the participants had abnormal  
35 lipid levels. To summarize, it seems that in our study there is a comparable percentage of  
36 hypertension, but increased percentage of obesity and abnormal cholesterol levels.  
37  
38  
39  
40

41 Some limitations need to be mentioned. The first relates to our definition of night shifts,  
42 as only 3 hours of work between 10pm and 6am classified someone as a night shift  
43 worker. To account for this, we did additional sensitivity analyses using different cut-offs  
44 for the number of nights. This did not change our findings. Unfortunately we did not have  
45 information on the exact number of hours worked per night as defining a night shift based  
46 on hours worked per night instead of defining a night shift as soon as one has worked 3  
47 hours between 10pm and 6 am might have influenced our findings.  
48  
49  
50  
51  
52  
53  
54  
55  
56  
57  
58  
59  
60

1  
2  
3 The combined LVH outcome may result in overestimating the number of participants with  
4 LVH as the gold standard to evaluate LVH would be cardiac echocardiography. CIMT data  
5 were only available for 43% of the participants. This limits the power, but as CIMT scans  
6 were omitted randomly and the number of missing scans was evenly divided over the  
7 groups, we do not expect that this would result in a bias.  
8  
9  
10  
11

12  
13 A major strength of this study is the size of the study with 607 truck drivers, of whom half  
14 were working day-night shifts. This is the largest cohort of male truck drivers in South  
15 Africa and to our knowledge possibly the largest in Africa. Our data represent the situation  
16 in the general truck driver community in South Africa and beyond as drivers from several  
17 African countries were included at public truck stops. Another strength is that we defined  
18 CVD risk in different ways, and we have shown that outcomes do not differ significantly  
19 between day- and day-night shift workers.  
20  
21  
22  
23  
24  
25  
26

## 27 **Conclusion**

28  
29  
30 CVD risk factors are abundantly present in male long-haul truck drivers in South Africa.  
31 CVD risk does not differ between dayshift and day-night shift workers in this cross-  
32 sectional analysis. Nevertheless, the high prevalence of CVD risk factors in this male  
33 cohort necessitates further investigation to develop and implement strategies to reduce  
34 CVD risk.  
35  
36  
37  
38  
39

## 40 **Author contributions**

41  
42  
43 Designed the study: MD, AGV, WDFV, DEG. Analysed the data and interpreted results:  
44 MD, KS, AGV. Wrote the initial draft: MD, AGV. All authors critically reviewed and  
45 approved of the final draft.  
46  
47  
48  
49

## 50 **Conflict of interest statement**

51  
52  
53 The authors declare that there is no conflict of interest.  
54  
55  
56  
57  
58  
59  
60

## Funding

This work was funded by North Star Alliance through a research and implementation grant received from the Ministry of Foreign Affairs of the Netherlands, managed by the Royal Dutch Embassy of Mozambique. The Amsterdam Institute for Global Health and Development (AIGHD) and Wits RHI held separate contracts with North Star Alliance (AIGHD's grant reference: 0068 North Star – NSCDP; WRHI's grant number: D1404070).

The views of this study are those of the authors and do not necessarily reflect the views of any of the funders or the South African and Dutch governments.

## Data availability statement

Deidentified participant data are available upon reasonable request by contacting the corresponding author.

## Study approval

The study was approved by the Human Research Ethics Committee (Medical) of the University of Witwatersrand (reference number M160760).

## References

1. Goff Jr DC, Lloyd-Jones DM, Bennett G, et al. 2013 ACC/AHA guideline on the assessment of cardiovascular risk: a report of the American College of Cardiology/American Heart Association Task Force on Practice Guidelines. *J Am Coll Cardiol*. 2014;63(25 Pt B):2935-2959. doi:10.1016/j.jacc.2013.11.005
2. Benjamin EJ, Blaha MJ, Chiuve SE, et al. Heart Disease and Stroke Statistics-2017 Update: A Report From the American Heart Association. *Circulation*. 2017;135(10):e146-e603. doi:10.1161/CIR.0000000000000485
3. WHO. Cardiovascular diseases fact sheet. Geneva: World Health Organization, May 2017. [https://www.who.int/news-room/fact-sheets/detail/cardiovascular-diseases-\(cvds\)](https://www.who.int/news-room/fact-sheets/detail/cardiovascular-diseases-(cvds)). Accessed February 4, 2019.



- 1  
2  
3 4. Wyk VP, Msemburi W, Laubscher R, et al. Second National Burden of Disease  
4 Study South Africa: national and subnational mortality trends, 1997-2009.  
5 Lancet. 2013;381:S113. doi:10.1016/S0140-6736(13)61367-7  
6  
7
- 8  
9 5. Mortality and causes of death in South Africa, 2016: Findings from death  
10 notification / Statistics South Africa. Pretoria: Statistics South Africa, 2016.  
11 <http://www.statssa.gov.za/publications/P03093/P030932016.pdf>. Accessed  
12 February 5, 2019.  
13  
14
- 15  
16 6. Kannel WB, Dawber TR, Kagan A, Revotskie N, Stokes III J. Factors of Risk in the  
17 Development of Coronary Heart Disease—Six-Year Follow-up Experience: The  
18 Framingham Study. *Ann Intern Med*. 1961;55(1):33-50. doi:10.7326/0003-4819-  
19 55-1-33  
20  
21
- 22  
23 7. Robinson CF, Burnett CA. Truck drivers and heart disease in the United States,  
24 1979–1990. *Am J Ind Med*. 2005;47(2):113-119. doi:10.1002/ajim.20126  
25  
26
- 27 8. Birdsey J, Sieber WK, Chen GX, et al. National Survey of US Long-Haul Truck  
28 Driver Health and Injury: Health Behaviors. *J Occup Environ Med*. 2015;57(2).  
29  
30
- 31 9. Torquati L, Mielke GI, Brown WJ, Kolbe-Alexander T. Shift work and the risk of  
32 cardiovascular disease. A systematic review and meta-analysis including dose-  
33 response relationship. *Scand J Work Environ Heal*. 2018;44(3):229-238.  
34  
35  
36  
37 doi:10.5271/sjweh.3700
- 38 10. Morris CJ, Yang JN, Scheer FAJL. The impact of the circadian timing system on  
39 cardiovascular and metabolic function. *Prog Brain Res*. 2012;199:337-358.  
40  
41  
42  
43 doi:10.1016/B978-0-444-59427-3.00019-8
- 44 11. Lalla-Edward ST, Ncube S, Matthew P, Hankins CA, Venter WDF, Gomez GB.  
45 Uptake of health services among truck drivers in South Africa: Analysis of routine  
46 data from nine roadside wellness centres. *BMC Health Serv Res*. 2017.  
47  
48  
49  
50  
51 doi:10.1186/s12913-017-2595-3
- 52 12. Lalla-Edward ST, Fischer AE, Venter WDF, et al. Cross-sectional study of the  
53 health of southern African truck drivers. *BMJ Open*. 2019;9(10):e032025.  
54  
55  
56  
57  
58  
59  
60  
61  
62  
63  
64  
65  
66  
67  
68  
69  
70  
71  
72  
73  
74  
75  
76  
77  
78  
79  
80  
81  
82  
83  
84  
85  
86  
87  
88  
89  
90  
91  
92  
93  
94  
95  
96  
97  
98  
99  
100  
doi:10.1136/bmjopen-2019-032025

- 1  
2  
3 13. Creel AH, Rimal RN. Factors related to HIV-testing behavior and interest in  
4 testing in Namibia. *AIDS Care*. 2011;23(7):901-907.  
5  
6 doi:10.1080/09540121.2010.540227  
7
- 8  
9 14. Buysse DJ, Reynolds CF, Monk TH, Berman SR, Kupfer DJ. The Pittsburgh sleep  
10 quality index: A new instrument for psychiatric practice and research. *Psychiatry*  
11 *Res*. 1989;28(2):193-213. doi:https://doi.org/10.1016/0165-1781(89)90047-4  
12  
13
- 14 15. Amireault S, Godin G. The Godin-Shephard leisure-time physical activity  
15 questionnaire: Validity evidence supporting its use for classifying healthy adults  
16 into active and insufficiently active categories. *Percept Mot Skills*. 2015.  
17  
18 doi:10.2466/03.27.PMS.120v19x7  
19
- 20 21 16. World Health Organization (2005). WHO STEPS Surveillance Manual: The WHO  
22 STEPwise approach to chronic disease risk factor surveillance. Geneva, World  
23 Health Organization.  
24  
25
- 26 27 17. Chobanian A V., Bakris GL, Black HR, et al. Seventh report of the Joint National  
28 Committee on Prevention, Detection, Evaluation, and Treatment of High Blood  
29 Pressure. *Hypertension*. 2003. doi:10.1161/01.HYP.0000107251.49515.c2  
30  
31
- 32 33 18. NICE. Type 2 diabetes in adults: management. *Natl Inst Heal Care Excell*. 2018.  
34
- 35 36 19. Grundy SM, Stone NJ, Bailey AL, et al. 2018  
37 AHA/ACC/AACVPR/AAPA/ABC/ACPM/ADA/AGS/APhA/ASPC/NLA/PCNA  
38 Guideline on the Management of Blood Cholesterol: A Report of the American  
39 College of Cardiology/American Heart Association Task Force on Clinical Practice  
40 Guidelines. *J Am Coll Cardiol*. 2018.  
41  
42 doi:https://doi.org/10.1016/j.jacc.2018.11.003  
43  
44
- 45 46 20. Levey AS, Bosch JP, Lewis JB, Greene T, Rogers N, Roth D. A more accurate  
47 method to estimate glomerular filtration rate from serum creatinine: a new  
48 prediction equation. Modification of Diet in Renal Disease Study Group. *Ann*  
49 *Intern Med*. 1999.  
50  
51  
52  
53  
54  
55  
56  
57  
58  
59  
60

- 1  
2  
3 21. Sytkowski PA, Kannel WB, D'Agostino RB. Changes in Risk Factors and the Decline  
4 in Mortality from Cardiovascular Disease. *N Engl J Med.* 1990;322(23):1635-  
5 1641. doi:10.1056/NEJM199006073222304  
6  
7  
8 22. D'Agostino RB, Vasan RS, Pencina MJ, et al. General cardiovascular risk profile for  
9 use in primary care: The Framingham heart study. *Circulation.* 2008.  
10 doi:10.1161/CIRCULATIONAHA.107.699579  
11  
12  
13 23. Lloyd-Jones DM, Huffman MD, Karmali KN, et al. Estimating Longitudinal Risks  
14 and Benefits From Cardiovascular Preventive Therapies Among Medicare  
15 Patients: The Million Hearts Longitudinal ASCVD Risk Assessment Tool: A Special  
16 Report From the American Heart Association and American College of Cardiol.  
17 *J Am Coll Cardiol.* 2017;69(12):1617-1636.  
18 doi:https://doi.org/10.1016/j.jacc.2016.10.018  
19  
20  
21 24. Alfakih K, Walters K, Jones T, Ridgway J, S. HA, Mohan S. New Gender-Specific  
22 Partition Values for ECG Criteria of Left Ventricular Hypertrophy. *Hypertension.*  
23 2004;44(2):175-179. doi:10.1161/01.HYP.0000135249.66192.30  
24  
25  
26 25. Casale PN, Devereux RB, Alonso DR, Campo E, Kligfield P. Improved sex-specific  
27 criteria of left ventricular hypertrophy for clinical and computer interpretation of  
28 electrocardiograms: Validation with autopsy findings. *Circulation.* 1987.  
29 doi:10.1161/01.CIR.75.3.565  
30  
31  
32 26. Devereux RB, Casale PN, Eisenberg RR, Miller DH, Kligfield P.  
33 Electrocardiographic detection of left ventricular hypertrophy using  
34 echocardiographic determination of left ventricular mass as the reference  
35 standard: Comparison of standard criteria, computer diagnosis and physician  
36 interpretation. *J Am Coll Cardiol.* 1984. doi:10.1016/S0735-1097(84)80433-7  
37  
38  
39 27. Sokolow M, Lyon TP. The ventricular complex in left ventricular hypertrophy as  
40 obtained by unipolar precordial and limb leads. *Am Heart J.* 1949.  
41 doi:10.1016/0002-8703(49)90562-1  
42  
43  
44  
45  
46  
47  
48  
49  
50  
51  
52  
53  
54  
55  
56  
57  
58  
59  
60

- 1  
2  
3 28. Okin PM, Roman MJ, Devereux RB, Kligfield P. Electrocardiographic identification  
4 of increased left ventricular mass by simple voltage-duration products. *J Am Coll*  
5 *Cardiol.* 1995. doi:10.1016/0735-1097(94)00371-V  
6  
7
- 8 29. Bots ML, Evans GW, Tegeler CH, Meijer R. Carotid Intima-media Thickness  
9 Measurements: Relations with Atherosclerosis, Risk of Cardiovascular Disease  
10 and Application in Randomized Controlled Trials. *Chin Med J (Engl).*  
11 2016;129(2):215-226. doi:10.4103/0366-6999.173500  
12  
13
- 14 30. Boulos NM, Gardin JM, Malik S, Postley J, Wong ND. Carotid Plaque  
15 Characterization, Stenosis, and Intima-Media Thickness According to Age and  
16 Gender in a Large Registry Cohort. *Am J Cardiol.* 2016;117(7):1185-1191.  
17 doi:10.1016/j.amjcard.2015.12.062  
18  
19
- 20 31. Naqvi TZ, Lee M-S. Carotid Intima-Media Thickness and Plaque in Cardiovascular  
21 Risk Assessment. *JACC Cardiovasc Imaging.* 2014;7(10):1025-1038.  
22 doi:https://doi.org/10.1016/j.jcmg.2013.11.014  
23  
24
- 25 32. Lajoie P, Aronson KJ, Day A, Tranmer J. A cross-sectional study of shift work,  
26 sleep quality and cardiometabolic risk in female hospital employees. *BMJ Open.*  
27 2015. doi:10.1136/bmjopen-2014-007327  
28  
29
- 30 33. Loef B, Van Baarle D, Van Der Beek AJ, Beekhof PK, Van Kerkhof LW, Proper KI.  
31 The association between exposure to different aspects of shift work and  
32 metabolic risk factors in health care workers, and the role of chronotype. *PLoS*  
33 *One.* 2019. doi:10.1371/journal.pone.0211557  
34  
35
- 36 34. Wang A, Arah OA, Kauhanen J, Krause N. Shift work and 20-year incidence of  
37 acute myocardial infarction: Results from the Kuopio Ischemic Heart Disease Risk  
38 Factor Study. *Occup Environ Med.* 2016. doi:10.1136/oemed-2015-103245  
39  
40
- 41 35. Sieber WK, Robinson CF, Birdsey J, et al. Obesity and other risk factors: the  
42 national survey of U.S. long-haul truck driver health and injury. *Am J Ind Med.*  
43 2014;57(6):615-626. doi:10.1002/ajim.22293  
44  
45  
46  
47  
48  
49  
50  
51  
52  
53  
54  
55  
56  
57  
58  
59  
60

Table 1. Characteristics of the study population

|                                                   | <b>Participants<br/>(n=607)</b> | <b>Day shifts<br/>(n=305)</b> | <b>Day-night shifts<br/>(n=302)</b> |
|---------------------------------------------------|---------------------------------|-------------------------------|-------------------------------------|
| Age (years), median (IQR)                         | 37 (31-42)                      | 37 (32-43)                    | 36 (30-42)                          |
| Country of origin, n                              | 605                             | 303                           | 302                                 |
| Zimbabwe, n (%)                                   | 378 (62.5%)                     | 188 (62.0%)                   | 190 (62.9%)                         |
| South Africa, n (%)                               | 122 (20.2%)                     | 60 (19.8%)                    | 62 (20.5%)                          |
| Zambia, n (%)                                     | 45 (7.4%)                       | 24 (7.9%)                     | 21 (7.0%)                           |
| Other, n (%)                                      | 60 (9.9%)                       | 31 (10.2%)                    | 29 (9.6%)                           |
| Working as driver (years), median (IQR)           | 9 (5-14)                        | 9 (5-14)                      | 8 (5-14)                            |
| Time spent working per month (days), median (IQR) | 20 (15-24)                      | 20 (18-24)                    | 20 (15-24)                          |
| Time sleeping/day (hours), median (IQR)           | 8 (6-9)                         | 8 (6-9)                       | 7.5 (6-9)                           |
| Education level, n                                | 585                             | 287                           | 298                                 |
| Primary school or less, n (%)                     | 51 (8.7%)                       | 32 (11.1%)                    | 19 (6.4%)                           |
| Secondary school, n (%)                           | 322 (55.0%)                     | 150 (52.3%)                   | 172 (57.7%)                         |
| Matrix/college/university, n (%)                  | 212 (36.2%)                     | 105 (36.6%)                   | 107 (35.9%)                         |
| Marital status, n                                 | 607                             | 305                           | 302                                 |
| Stable relationship, n (%)                        | 545 (89.8%)                     | 278 (91.1%)                   | 267 (88.4%)                         |
| No relationship, n (%)                            | 62 (10.2%)                      | 27 (8.9%)                     | 35 (11.6%)                          |
| HIV positive, n (%)                               | 54 (8.9%)                       | 24 (7.9%)                     | 30 (9.9%)                           |
| Weekly leisure activity score, median (IQR)       | 17 (0-27)                       | 17 (0-19)                     | 17 (0-31)                           |
| Body mass index (kg/cm <sup>2</sup> ), n          | 597                             | 298                           | 299                                 |
| Body mass index < 30 kg/cm <sup>2</sup> , n (%)   | 428 (71.7%)                     | 220 (73.8%)                   | 208 (69.6%)                         |

36. Korelitz JJ, Fernandez AA, Uyeda VJ, Spivey GH, Browdy BL, Schmidt RT. Health habits and risk factors among truck drivers visiting a health booth during a trucker trade show. *Am J Heal Promot.* 1993. doi:10.4278/0890-1171-8.2.117
37. Kandala NB, Tigbe W, Manda SO, Stranges S. Geographic variation of hypertension in sub-Saharan Africa: A case study of South Africa. *Am J Hypertens.* 2013. doi:10.1093/ajh/hps063
38. Clark SJ, Gómez-Olivé FX, Houle B, et al. Cardiometabolic disease risk and HIV status in rural South Africa: Establishing a baseline. *BMC Public Health.* 2015. doi:10.1186/s12889-015-1467-1

|                                                                                                                                                                                                        |                  |                  |                  |
|--------------------------------------------------------------------------------------------------------------------------------------------------------------------------------------------------------|------------------|------------------|------------------|
| Body mass index $\geq 30$ kg/cm <sup>2</sup> , n (%)                                                                                                                                                   | 169 (28.3%)      | 78 (26.2%)       | 91 (30.4%)       |
| Waist to hip ratio, median (IQR)                                                                                                                                                                       | 0.86 (0.81-0.91) | 0.87 (0.82-0.92) | 0.85 (0.80-0.91) |
| Neck circumference (cm), median (IQR)                                                                                                                                                                  | 37 (36-39)       | 37 (35-39)       | 38 (36-40)       |
| Smoking ever in life, n (%)                                                                                                                                                                            | 90 (14.9%)       | 47 (15.6%)       | 43 (14.2%)       |
| Family history for CVD, n (%)                                                                                                                                                                          | 32 (5.3%)        | 14 (4.7%)        | 18 (6.0%)        |
| Heart rate (bpm), median (IQR)                                                                                                                                                                         | 75 (66-83)       | 75 (68-83)       | 75 (65-83)       |
| Blood pressure classification, n                                                                                                                                                                       | 594              | 297              | 297              |
| Normal, n (%)                                                                                                                                                                                          | 100 (16.8%)      | 43 (14.5%)       | 57 (19.2%)       |
| Pre-hypertension <sup>a</sup> , n (%)                                                                                                                                                                  | 297 (50.0%)      | 159 (53.5%)      | 138 (46.5%)      |
| Hypertension <sup>b</sup> or Tx, n (%)                                                                                                                                                                 | 197 (33.2%)      | 95 (32.0%)       | 102 (34.3%)      |
| Serum glucose, n                                                                                                                                                                                       | 457              | 234              | 223              |
| $\geq 7.8$ mmol/L or Tx, n (%)                                                                                                                                                                         | 38 (8.3%)        | 18 (7.7%)        | 20 (9.0%)        |
| $< 7.8$ mmol/L, n (%)                                                                                                                                                                                  | 419 (91.7%)      | 216 (92.3%)      | 203 (91.0%)      |
| Serum Creatinine                                                                                                                                                                                       | 586              | 296              | 290              |
| $\geq 110$ mmol/L, n (%)                                                                                                                                                                               | 102 (17.4%)      | 58 (19.6%)       | 44 (15.2%)       |
| $< 110$ mmol/L, n (%)                                                                                                                                                                                  | 484 (82.6%)      | 238 (80.4%)      | 246 (84.8%)      |
| eGFR <sup>c</sup>                                                                                                                                                                                      | 586              | 296              | 290              |
| $\geq 90$ ml/min/1.73m <sup>2</sup> , n (%)                                                                                                                                                            | 440 (75.1%)      | 212 (71.6%)      | 228 (78.6%)      |
| 60-90ml/min/1.73m <sup>2</sup> , n (%)                                                                                                                                                                 | 139 (23.7%)      | 80 (27.0%)       | 59 (20.3%)       |
| $< 60$ ml/min/1.73m <sup>2</sup> , n (%)                                                                                                                                                               | 7 (1.2%)         | 4 (1.4%)         | 3 (1.1%)         |
| Total cholesterol                                                                                                                                                                                      | 587              | 296              | 291              |
| $\geq 5.17$ mmol/L, n (%)                                                                                                                                                                              | 140 (23.9%)      | 77 (26.0%)       | 63 (21.6%)       |
| $< 5.17$ mmol/L, n (%)                                                                                                                                                                                 | 447 (76.1%)      | 219 (74.0%)      | 228 (78.4%)      |
| HDL cholesterol                                                                                                                                                                                        | 587              | 296              | 291              |
| $\leq 1.04$ mmol/L, n (%)                                                                                                                                                                              | 151 (25.7%)      | 79 (26.7%)       | 72 (24.7%)       |
| $> 1.04$ mmol/L, n (%)                                                                                                                                                                                 | 436 (74.3%)      | 271 (73.3%)      | 219 (75.3%)      |
| LDL cholesterol                                                                                                                                                                                        | 587              | 296              | 291              |
| $\geq 3.0$ mmol/L, n (%)                                                                                                                                                                               | 217 (37.0%)      | 113 (38.2%)      | 104 (35.7%)      |
| $< 3.0$ mmol/L, n (%)                                                                                                                                                                                  | 370 (63.0%)      | 183 (61.8%)      | 187 (64.3%)      |
| Triglycerides                                                                                                                                                                                          | 587              | 296              | 291              |
| $\geq 1.7$ mmol/L, n (%)                                                                                                                                                                               | 211 (35.9%)      | 116 (39.2%)      | 95 (32.6%)       |
| $< 1.7$ mmol/L, n (%)                                                                                                                                                                                  | 376 (64.1%)      | 180 (60.8%)      | 196 (67.4%)      |
| Abbreviations: P: p-value; IQR: Interquartile range; bpm: beats per minute; Tx: on medication; eGFR: estimated glomerular filtration rate; HDL: High-density-lipoprotein; LDL: Low-density-lipoprotein |                  |                  |                  |
| <sup>a</sup> : Systolic blood pressure $>120$ mmHg and/or diastolic blood pressure $>80$ mmHg                                                                                                          |                  |                  |                  |
| <sup>b</sup> : Systolic blood pressure $>140$ mmHg and/or diastolic blood pressure $>90$ mmHg                                                                                                          |                  |                  |                  |
| <sup>c</sup> : Calculated using: $186 \times (\text{Creatinine}/88.4)^{-1.154} \times (\text{Age})^{-0.203} \times (0.742 \text{ if female}) \times (1.210 \text{ if black African})$                  |                  |                  |                  |

Table 2. Descriptive statistics of cardiovascular risk assessments

|  | Participants<br>(n=607) | Day shifts<br>(n=305) | Day-night shifts<br>(n=302) | P |
|--|-------------------------|-----------------------|-----------------------------|---|
|  |                         |                       |                             |   |

|                                                                                                                                                                                                                                              |                  |                  |                  |             |
|----------------------------------------------------------------------------------------------------------------------------------------------------------------------------------------------------------------------------------------------|------------------|------------------|------------------|-------------|
| Framingham risk score                                                                                                                                                                                                                        |                  |                  |                  |             |
| 10-year Framingham risk percentage, n                                                                                                                                                                                                        | 585              | 295              | 290              | <b>0.05</b> |
| 10-year Framingham risk percentage, median (IQR)                                                                                                                                                                                             | 3.21 (1.66-5.99) | 3.52 (1.95-6.23) | 2.98 (1.47-5.56) |             |
| Low risk (< 10%), n (%)                                                                                                                                                                                                                      | 518 (88.5%)      | 265 (89.8%)      | 253 (87.2%)      |             |
| Intermediate risk (10-20%), n (%)                                                                                                                                                                                                            | 52 (9.0%)        | 24 (8.1%)        | 28 (9.7%)        |             |
| High risk (> 20%), n (%)                                                                                                                                                                                                                     | 15 (2.5%)        | 6 (2.0%)         | 9 (3.1%)         |             |
| ASCVD risk score                                                                                                                                                                                                                             |                  |                  |                  |             |
| 10-year ASCVD risk percentage, n                                                                                                                                                                                                             | 215              | 111              | 104              | 0.94        |
| 10-year ASCVD risk percentage, median (IQR)                                                                                                                                                                                                  | 5.13 (3.62-7.20) | 5.16 (3.64-6.66) | 5.12 (3.57-7.63) |             |
| Low risk (< 5%), n (%)                                                                                                                                                                                                                       | 103 (47.9)       | 54 (48.6%)       | 49 (47.1%)       |             |
| Intermediate risk (5-20%), n (%)                                                                                                                                                                                                             | 107 (49.8%)      | 55 (49.5%)       | 52 (50.0%)       |             |
| High risk (≥ 20%), n (%)                                                                                                                                                                                                                     | 5 (2.3%)         | 2 (1.8%)         | 3 (2.9%)         |             |
| Cornell LVH                                                                                                                                                                                                                                  |                  |                  |                  |             |
| LVH based on Criteria > 2.8mV, n (%)                                                                                                                                                                                                         | 555              | 14 (4.9%)        | 9 (3.3%)         | 0.33        |
| LVH based on Product > 244mVms, n (%)                                                                                                                                                                                                        | 547              | 18 (6.5%)        | 11 (4.1%)        | 0.21        |
| Sokolow-Lyon LVH                                                                                                                                                                                                                             |                  |                  |                  |             |
| LVH based on Criteria > 3.5mV, n (%)                                                                                                                                                                                                         | 581              | 92 (31.7%)       | 94 (32.3%)       | 0.88        |
| LVH combined, n (%)                                                                                                                                                                                                                          | 582              | 105 (36.1%)      | 104 (35.7%)      | 0.93        |
| CIMT                                                                                                                                                                                                                                         |                  |                  |                  |             |
| mean CCA IMT (mm), median (IQR)                                                                                                                                                                                                              | 217              | 0.54 (0.50-0.70) | 0.52 (0.49-0.59) | 0.10        |
| max CCA IMT (mm), median (IQR)                                                                                                                                                                                                               | 217              | 0.62 (0.57-0.70) | 0.60 (0.55-0.66) | 0.12        |
| max bulb IMT (mm), median (IQR)                                                                                                                                                                                                              | 216              | 0.70 (0.60-0.86) | 0.61 (0.51-0.75) | <b>0.01</b> |
| Carotid plaque, n (%)                                                                                                                                                                                                                        | 216              | 5 (4.1%)         | 4 (4.3%)         | 0.93        |
| <i>Abbreviations: P: p-value; IQR: Interquartile range; ASCVD: Arteriosclerotic cardiovascular disease; LVH: Left ventricular hypertrophy; CIMT: Carotid intima-media thickness; CCA: Common carotid artery; IMT: Intima media thickness</i> |                  |                  |                  |             |

### Abbreviations

AIGHD: Amsterdam Institute for Global Health and Development

ASCVD: Atherosclerotic Cardiovascular Disease

BMI: Body-Mass Index

CCA: Common Carotid Artery

CIMT: Carotid Intima-Media Thickness

CVD: Cardiovascular Disease

ECG: Electrocardiogram

eGFR: Estimated glomerular filtration rate

FRS: Framingham Risk Score

1  
2  
3 HDL: High-Density-Lipoprotein  
4

5 IMT: Intima-Media Thickness  
6

7 IQR: Interquartile Range  
8

9 LDL: Low-Density-Lipoprotein  
10

11 LVH: Left Ventricular Hypertrophy  
12

13 NSA: North-Star Alliance  
14

15 OR: Odds Ratio  
16

17 *P*: p-value  
18

19 TG: Triglycerides  
20

21 WRHI: Wits Reproductive Health and HIV Institute  
22  
23  
24  
25  
26  
27  
28  
29  
30  
31  
32  
33  
34  
35  
36  
37  
38  
39  
40  
41  
42  
43  
44  
45  
46  
47  
48  
49  
50  
51  
52  
53  
54  
55  
56  
57  
58  
59  
60



## Appendix

## Appendix 1: Uni- and multivariable analysis

| Linear regression         | Log (FRS)                                                     |          |                                                                 |                  |
|---------------------------|---------------------------------------------------------------|----------|-----------------------------------------------------------------|------------------|
|                           | Univariable<br>Unstandardized $\beta$<br>coefficient (95% CI) | <i>P</i> | Multivariable<br>Unstandardized $\beta$<br>coefficient (95% CI) | <i>P</i>         |
| Day/night shift           | -0.05 (-0.12-0.01)                                            | 0.13     | -0.02 (-0.06-0.02)                                              | 0.18             |
| Age                       | 0.04 (0.04-0.04)                                              | <0.01    | 0.04 (0.03-0.04)                                                | <b>&lt;0.01</b>  |
| Country of origin         |                                                               |          |                                                                 |                  |
| Zimbabwe                  | -0.07 (-0.14--0.00)                                           | 0.04     | -0.01 (-0.07-0.04)                                              | 0.68             |
| South Africa              | Reference                                                     |          |                                                                 |                  |
| Zambia                    | -0.03 (-0.16-0.10)                                            | 0.67     | 0.04 (-0.03-0.15)                                               | 0.28             |
| Other                     | 0.05 (-0.06-0.16)                                             | 0.38     | 0.02 (-0.06-0.08)                                               | 0.48             |
| Education level           |                                                               |          |                                                                 |                  |
| Primary school or less    | 0.13 (0.01-0.25)                                              | 0.04     | -0.09 (-0.10-0.03)                                              | <b>0.01</b>      |
| Secondary school          | Reference                                                     |          |                                                                 |                  |
| Matrix/college/university | -0.02 (-0.09-0.05)                                            | 0.65     | 0.01 (-0.01-0.07)                                               | 0.76             |
| Stable relationship       | 0.31 (0.20-0.41)                                              | <0.01    | 0.10 (-0.004-0.12)                                              | <b>&lt; 0.01</b> |

| Linear regression         | Log (ASCVD)                                                   |          |                                                                 |                  |
|---------------------------|---------------------------------------------------------------|----------|-----------------------------------------------------------------|------------------|
|                           | Univariable<br>Unstandardized $\beta$<br>coefficient (95% CI) | <i>P</i> | Multivariable<br>Unstandardized $\beta$<br>coefficient (95% CI) | <i>P</i>         |
| Day/night shift           | -0.03 (-0.08-0.02)                                            | 0.28     | -0.01 (-0.03-0.02)                                              | 0.49             |
| Age                       | 0.03 (0.03-0.03)                                              | <0.01    | 0.03 (0.03-0.03)                                                | <b>&lt;0.01</b>  |
| Country of origin         |                                                               |          |                                                                 |                  |
| Zimbabwe                  | -0.65 (-0.12--0.01)                                           | 0.02     | 0.001 (-0.03-0.03)                                              | 0.97             |
| South Africa              | Reference                                                     |          |                                                                 |                  |
| Zambia                    | -0.01 (-0.11-0.09)                                            | 0.82     | 0.04 (-0.01-0.09)                                               | 0.13             |
| Other                     | 0.04 (-0.05-0.12)                                             | 0.37     | 0.01 (-0.03-0.06)                                               | 0.58             |
| Education level           |                                                               |          |                                                                 |                  |
| Primary school or less    | 0.10 (0.01-0.19)                                              | 0.03     | -0.08 (-0.12--0.03)                                             | <b>&lt; 0.01</b> |
| Secondary school          | Reference                                                     |          |                                                                 |                  |
| Matrix/college/university | -0.02 (-0.08-0.03)                                            | 0.38     | -0.01 (-0.04-0.02)                                              | 0.55             |
| Stable relationship       | 0.22 (0.14-0.30)                                              | <0.01    | 0.06 (0.02-0.10)                                                | <b>&lt; 0.01</b> |

| Linear regression | Log (mean CCA-IMT)                                            |          |                                                                 |          |
|-------------------|---------------------------------------------------------------|----------|-----------------------------------------------------------------|----------|
|                   | Univariable<br>Unstandardized $\beta$<br>coefficient (95% CI) | <i>P</i> | Multivariable<br>Unstandardized $\beta$<br>coefficient (95% CI) | <i>P</i> |

|                           |                     |        |                     |                 |
|---------------------------|---------------------|--------|---------------------|-----------------|
| Day/night shift           | -0.01 (-0.03-0.003) | 0.12   | -0.003 (-0.02-0.02) | 0.74            |
| Age                       | 0.01 (0.004-0.01)   | <0.01  | 0.006 (0.005-0.007) | <b>&lt;0.01</b> |
| Country of origin         |                     |        |                     |                 |
| Zimbabwe                  | -0.01 (-0.04-0.03)  | 0.74   |                     |                 |
| South Africa              | Reference           |        |                     |                 |
| Zambia                    | -0.02 (-0.07-0.01)  | 0.24   |                     |                 |
| Other                     | -0.04 (-0.05-0.04)  | 0.83   |                     |                 |
| Education level           |                     |        |                     |                 |
| Primary school or less    | 0.01 (-0.01-0.04)   | 0.29   |                     |                 |
| Secondary school          | Reference           |        |                     |                 |
| Matrix/college/university | -0.01 (-0.03-0.01)  | 0.30   |                     |                 |
| Stable relationship       | 0.04 (0.01-0.06)    | < 0.01 | 0.008 (-0.02-0.04)  | 0.61            |

| Binomial logistic regression | LVH combined               |          |                              |                 |
|------------------------------|----------------------------|----------|------------------------------|-----------------|
|                              | Univariable OR<br>(95% CI) | <i>P</i> | Multivariable OR<br>(95% CI) | <i>P</i>        |
| Day/night shift              | 0.99 (0.70-1.38)           | 0.93     | 0.94 (0.67-1.33)             | 0.73            |
| Age                          | 0.98 (0.96-1.00)           | 0.03     | 0.99 (0.97-1.00)             | 0.12            |
| Country of origin            |                            |          |                              |                 |
| Zimbabwe                     | 1.34 (0.86-2.08)           | 0.21     |                              |                 |
| South Africa                 | Reference                  |          |                              |                 |
| Zambia                       | 1.18 (0.55-2.51)           | 0.67     |                              |                 |
| Other                        | 1.15 (0.59-2.24)           | 0.68     |                              |                 |
| Education level              |                            |          |                              |                 |
| Primary school or less       | 1.36 (0.73-2.52)           | 0.33     |                              |                 |
| Secondary school             | Reference                  |          |                              |                 |
| Matrix/college/university    | 1.21 (0.83-1.74)           | 0.32     |                              |                 |
| Stable relationship          | 0.37 (0.21-0.64)           | <0.01    | 0.40 (0.23-0.70)             | <b>&lt;0.01</b> |

# Reporting checklist for cross sectional study.

Based on the STROBE cross sectional guidelines.

## Instructions to authors

Complete this checklist by entering the page numbers from your manuscript where readers will find each of the items listed below.

Your article may not currently address all the items on the checklist. Please modify your text to include the missing information. If you are certain that an item does not apply, please write "n/a" and provide a short explanation.

Upload your completed checklist as an extra file when you submit to a journal.

|                           |                     |                                                                                                 | Page   |
|---------------------------|---------------------|-------------------------------------------------------------------------------------------------|--------|
|                           | Reporting Item      |                                                                                                 | Number |
| <b>Title and abstract</b> |                     |                                                                                                 |        |
| Title                     | <a href="#">#1a</a> | Indicate the study's design with a commonly used term in the title or the abstract              | 1      |
| Abstract                  | <a href="#">#1b</a> | Provide in the abstract an informative and balanced summary of what was done and what was found | 3      |
| <b>Introduction</b>       |                     |                                                                                                 |        |
| Background / rationale    | <a href="#">#2</a>  | Explain the scientific background and rationale for the investigation being reported            | 5      |

|    |                      |                     |                                                                                                                                                                                                                                                                      |     |
|----|----------------------|---------------------|----------------------------------------------------------------------------------------------------------------------------------------------------------------------------------------------------------------------------------------------------------------------|-----|
| 1  | Objectives           | <a href="#">#3</a>  | State specific objectives, including any prespecified hypotheses                                                                                                                                                                                                     | 5   |
| 2  |                      |                     |                                                                                                                                                                                                                                                                      |     |
| 3  |                      |                     |                                                                                                                                                                                                                                                                      |     |
| 4  |                      |                     |                                                                                                                                                                                                                                                                      |     |
| 5  |                      |                     |                                                                                                                                                                                                                                                                      |     |
| 6  | <b>Methods</b>       |                     |                                                                                                                                                                                                                                                                      |     |
| 7  |                      |                     |                                                                                                                                                                                                                                                                      |     |
| 8  |                      |                     |                                                                                                                                                                                                                                                                      |     |
| 9  |                      |                     |                                                                                                                                                                                                                                                                      |     |
| 10 | Study design         | <a href="#">#4</a>  | Present key elements of study design early in the paper                                                                                                                                                                                                              | 6   |
| 11 |                      |                     |                                                                                                                                                                                                                                                                      |     |
| 12 |                      |                     |                                                                                                                                                                                                                                                                      |     |
| 13 | Setting              | <a href="#">#5</a>  | Describe the setting, locations, and relevant dates, including periods of recruitment, exposure, follow-up, and data collection                                                                                                                                      | 6   |
| 14 |                      |                     |                                                                                                                                                                                                                                                                      |     |
| 15 |                      |                     |                                                                                                                                                                                                                                                                      |     |
| 16 |                      |                     |                                                                                                                                                                                                                                                                      |     |
| 17 |                      |                     |                                                                                                                                                                                                                                                                      |     |
| 18 |                      |                     |                                                                                                                                                                                                                                                                      |     |
| 19 |                      |                     |                                                                                                                                                                                                                                                                      |     |
| 20 | Eligibility criteria | <a href="#">#6a</a> | Give the eligibility criteria, and the sources and methods of selection of participants.                                                                                                                                                                             | 6   |
| 21 |                      |                     |                                                                                                                                                                                                                                                                      |     |
| 22 |                      |                     |                                                                                                                                                                                                                                                                      |     |
| 23 |                      |                     |                                                                                                                                                                                                                                                                      |     |
| 24 |                      |                     |                                                                                                                                                                                                                                                                      |     |
| 25 |                      |                     |                                                                                                                                                                                                                                                                      |     |
| 26 |                      | <a href="#">#7</a>  | Clearly define all outcomes, exposures, predictors, potential confounders, and effect modifiers. Give diagnostic criteria, if applicable                                                                                                                             | 7   |
| 27 |                      |                     |                                                                                                                                                                                                                                                                      |     |
| 28 |                      |                     |                                                                                                                                                                                                                                                                      |     |
| 29 |                      |                     |                                                                                                                                                                                                                                                                      |     |
| 30 |                      |                     |                                                                                                                                                                                                                                                                      |     |
| 31 |                      |                     |                                                                                                                                                                                                                                                                      |     |
| 32 |                      |                     |                                                                                                                                                                                                                                                                      |     |
| 33 | Data sources /       | <a href="#">#8</a>  | For each variable of interest give sources of data and details of methods of assessment (measurement). Describe comparability of assessment methods if there is more than one group. Give information separately for for exposed and unexposed groups if applicable. | 7   |
| 34 | measurement          |                     |                                                                                                                                                                                                                                                                      |     |
| 35 |                      |                     |                                                                                                                                                                                                                                                                      |     |
| 36 |                      |                     |                                                                                                                                                                                                                                                                      |     |
| 37 |                      |                     |                                                                                                                                                                                                                                                                      |     |
| 38 |                      |                     |                                                                                                                                                                                                                                                                      |     |
| 39 |                      |                     |                                                                                                                                                                                                                                                                      |     |
| 40 |                      |                     |                                                                                                                                                                                                                                                                      |     |
| 41 |                      |                     |                                                                                                                                                                                                                                                                      |     |
| 42 |                      |                     |                                                                                                                                                                                                                                                                      |     |
| 43 |                      |                     |                                                                                                                                                                                                                                                                      |     |
| 44 |                      |                     |                                                                                                                                                                                                                                                                      |     |
| 45 | Bias                 | <a href="#">#9</a>  | Describe any efforts to address potential sources of bias                                                                                                                                                                                                            | 8   |
| 46 |                      |                     |                                                                                                                                                                                                                                                                      |     |
| 47 |                      |                     |                                                                                                                                                                                                                                                                      |     |
| 48 |                      |                     |                                                                                                                                                                                                                                                                      |     |
| 49 | Study size           | <a href="#">#10</a> | Explain how the study size was arrived at                                                                                                                                                                                                                            | 6   |
| 50 |                      |                     |                                                                                                                                                                                                                                                                      |     |
| 51 |                      |                     |                                                                                                                                                                                                                                                                      |     |
| 52 | Quantitative         | <a href="#">#11</a> | Explain how quantitative variables were handled in the analyses. If applicable, describe which groupings were chosen, and why                                                                                                                                        | 8/9 |
| 53 | variables            |                     |                                                                                                                                                                                                                                                                      |     |
| 54 |                      |                     |                                                                                                                                                                                                                                                                      |     |
| 55 |                      |                     |                                                                                                                                                                                                                                                                      |     |
| 56 |                      |                     |                                                                                                                                                                                                                                                                      |     |
| 57 |                      |                     |                                                                                                                                                                                                                                                                      |     |
| 58 |                      |                     |                                                                                                                                                                                                                                                                      |     |
| 59 |                      |                     |                                                                                                                                                                                                                                                                      |     |
| 60 |                      |                     |                                                                                                                                                                                                                                                                      |     |

|    |                  |                      |                                                               |     |
|----|------------------|----------------------|---------------------------------------------------------------|-----|
| 1  | Statistical      | <a href="#">#12a</a> | Describe all statistical methods, including those used to     | 9   |
| 2  |                  |                      |                                                               |     |
| 3  | methods          |                      | control for confounding                                       |     |
| 4  |                  |                      |                                                               |     |
| 5  |                  |                      |                                                               |     |
| 6  | Statistical      | <a href="#">#12b</a> | Describe any methods used to examine subgroups and            | 8/9 |
| 7  |                  |                      |                                                               |     |
| 8  | methods          |                      | interactions                                                  |     |
| 9  |                  |                      |                                                               |     |
| 10 |                  |                      |                                                               |     |
| 11 |                  |                      |                                                               |     |
| 12 | Statistical      | <a href="#">#12c</a> | Explain how missing data were addressed                       | 8   |
| 13 |                  |                      |                                                               |     |
| 14 | methods          |                      |                                                               |     |
| 15 |                  |                      |                                                               |     |
| 16 |                  |                      |                                                               |     |
| 17 | Statistical      | <a href="#">#12d</a> | If applicable, describe analytical methods taking account of  | -   |
| 18 |                  |                      |                                                               |     |
| 19 | methods          |                      | sampling strategy                                             |     |
| 20 |                  |                      |                                                               |     |
| 21 |                  |                      |                                                               |     |
| 22 |                  |                      |                                                               |     |
| 23 | Statistical      | <a href="#">#12e</a> | Describe any sensitivity analyses                             | 9   |
| 24 |                  |                      |                                                               |     |
| 25 | methods          |                      |                                                               |     |
| 26 |                  |                      |                                                               |     |
| 27 |                  |                      |                                                               |     |
| 28 | <b>Results</b>   |                      |                                                               |     |
| 29 |                  |                      |                                                               |     |
| 30 |                  |                      |                                                               |     |
| 31 | Participants     | <a href="#">#13a</a> | Report numbers of individuals at each stage of study—eg       | 9   |
| 32 |                  |                      |                                                               |     |
| 33 |                  |                      | numbers potentially eligible, examined for eligibility,       |     |
| 34 |                  |                      |                                                               |     |
| 35 |                  |                      | confirmed eligible, included in the study, completing follow- |     |
| 36 |                  |                      |                                                               |     |
| 37 |                  |                      | up, and analysed. Give information separately for for         |     |
| 38 |                  |                      |                                                               |     |
| 39 |                  |                      | exposed and unexposed groups if applicable.                   |     |
| 40 |                  |                      |                                                               |     |
| 41 |                  |                      |                                                               |     |
| 42 |                  |                      |                                                               |     |
| 43 | Participants     | <a href="#">#13b</a> | Give reasons for non-participation at each stage              | 10  |
| 44 |                  |                      |                                                               |     |
| 45 |                  |                      |                                                               |     |
| 46 | Participants     | <a href="#">#13c</a> | Consider use of a flow diagram                                | -   |
| 47 |                  |                      |                                                               |     |
| 48 |                  |                      |                                                               |     |
| 49 | Descriptive data | <a href="#">#14a</a> | Give characteristics of study participants (eg demographic,   | 11  |
| 50 |                  |                      |                                                               |     |
| 51 |                  |                      | clinical, social) and information on exposures and potential  |     |
| 52 |                  |                      |                                                               |     |
| 53 |                  |                      | confounders. Give information separately for exposed and      |     |
| 54 |                  |                      |                                                               |     |
| 55 |                  |                      | unexposed groups if applicable.                               |     |
| 56 |                  |                      |                                                               |     |
| 57 |                  |                      |                                                               |     |
| 58 |                  |                      |                                                               |     |
| 59 |                  |                      |                                                               |     |
| 60 |                  |                      |                                                               |     |

|    |                   |                      |                                                                   |          |
|----|-------------------|----------------------|-------------------------------------------------------------------|----------|
| 1  | Descriptive data  | <a href="#">#14b</a> | Indicate number of participants with missing data for each        | 11       |
| 2  |                   |                      | variable of interest                                              |          |
| 3  |                   |                      |                                                                   |          |
| 4  |                   |                      |                                                                   |          |
| 5  |                   |                      |                                                                   |          |
| 6  | Outcome data      | <a href="#">#15</a>  | Report numbers of outcome events or summary measures.             | 11/12    |
| 7  |                   |                      | Give information separately for exposed and unexposed             |          |
| 8  |                   |                      | groups if applicable.                                             |          |
| 9  |                   |                      |                                                                   |          |
| 10 |                   |                      |                                                                   |          |
| 11 |                   |                      |                                                                   |          |
| 12 |                   |                      |                                                                   |          |
| 13 |                   |                      |                                                                   |          |
| 14 | Main results      | <a href="#">#16a</a> | Give unadjusted estimates and, if applicable, confounder-         | 11/12    |
| 15 |                   |                      | adjusted estimates and their precision (eg, 95% confidence        |          |
| 16 |                   |                      | interval). Make clear which confounders were adjusted for         |          |
| 17 |                   |                      | and why they were included                                        |          |
| 18 |                   |                      |                                                                   |          |
| 19 |                   |                      |                                                                   |          |
| 20 |                   |                      |                                                                   |          |
| 21 |                   |                      |                                                                   |          |
| 22 |                   |                      |                                                                   |          |
| 23 |                   |                      |                                                                   |          |
| 24 | Main results      | <a href="#">#16b</a> | Report category boundaries when continuous variables were         | 10/11/12 |
| 25 |                   |                      | categorized                                                       |          |
| 26 |                   |                      |                                                                   |          |
| 27 |                   |                      |                                                                   |          |
| 28 |                   |                      |                                                                   |          |
| 29 | Main results      | <a href="#">#16c</a> | If relevant, consider translating estimates of relative risk into | -        |
| 30 |                   |                      | absolute risk for a meaningful time period                        |          |
| 31 |                   |                      |                                                                   |          |
| 32 |                   |                      |                                                                   |          |
| 33 |                   |                      |                                                                   |          |
| 34 |                   |                      |                                                                   |          |
| 35 | Other analyses    | <a href="#">#17</a>  | Report other analyses done—e.g., analyses of subgroups            | 13       |
| 36 |                   |                      | and interactions, and sensitivity analyses                        |          |
| 37 |                   |                      |                                                                   |          |
| 38 |                   |                      |                                                                   |          |
| 39 |                   |                      |                                                                   |          |
| 40 | <b>Discussion</b> |                      |                                                                   |          |
| 41 |                   |                      |                                                                   |          |
| 42 |                   |                      |                                                                   |          |
| 43 | Key results       | <a href="#">#18</a>  | Summarise key results with reference to study objectives          | 13       |
| 44 |                   |                      |                                                                   |          |
| 45 |                   |                      |                                                                   |          |
| 46 | Limitations       | <a href="#">#19</a>  | Discuss limitations of the study, taking into account sources     | 14       |
| 47 |                   |                      | of potential bias or imprecision. Discuss both direction and      |          |
| 48 |                   |                      | magnitude of any potential bias.                                  |          |
| 49 |                   |                      |                                                                   |          |
| 50 |                   |                      |                                                                   |          |
| 51 |                   |                      |                                                                   |          |
| 52 |                   |                      |                                                                   |          |
| 53 |                   |                      |                                                                   |          |
| 54 |                   |                      |                                                                   |          |
| 55 |                   |                      |                                                                   |          |
| 56 |                   |                      |                                                                   |          |
| 57 |                   |                      |                                                                   |          |
| 58 |                   |                      |                                                                   |          |
| 59 |                   |                      |                                                                   |          |
| 60 |                   |                      |                                                                   |          |

1 Interpretation [#20](#) Give a cautious overall interpretation considering objectives, 13/14  
2  
3 limitations, multiplicity of analyses, results from similar  
4  
5 studies, and other relevant evidence.  
6  
7

8  
9 Generalisability [#21](#) Discuss the generalisability (external validity) of the study 14  
10  
11 results  
12  
13

## 14 Other Information

15  
16  
17 Funding [#22](#) Give the source of funding and the role of the funders for the 15  
18  
19 present study and, if applicable, for the original study on  
20  
21 which the present article is based  
22  
23  
24

25 None The STROBE checklist is distributed under the terms of the Creative Commons Attribution  
26  
27 License CC-BY. This checklist can be completed online using <https://www.goodreports.org/>, a tool  
28  
29 made by the [EQUATOR Network](#) in collaboration with [Penelope.ai](#)  
30  
31  
32  
33  
34  
35  
36  
37  
38  
39  
40  
41  
42  
43  
44  
45  
46  
47  
48  
49  
50  
51  
52  
53  
54  
55  
56  
57  
58  
59  
60

# BMJ Open

## The influence of shift work on cardiovascular disease risk in Southern African long-distance truck drivers: A cross-sectional study

|                                 |                                                                                                                                                                                                                                                                                                                                                                                                                                                                                                                                                                                                                                                                                                                                                                                                                                                                                                                                                                                                                                                                                    |
|---------------------------------|------------------------------------------------------------------------------------------------------------------------------------------------------------------------------------------------------------------------------------------------------------------------------------------------------------------------------------------------------------------------------------------------------------------------------------------------------------------------------------------------------------------------------------------------------------------------------------------------------------------------------------------------------------------------------------------------------------------------------------------------------------------------------------------------------------------------------------------------------------------------------------------------------------------------------------------------------------------------------------------------------------------------------------------------------------------------------------|
| Journal:                        | <i>BMJ Open</i>                                                                                                                                                                                                                                                                                                                                                                                                                                                                                                                                                                                                                                                                                                                                                                                                                                                                                                                                                                                                                                                                    |
| Manuscript ID                   | bmjopen-2021-050645.R1                                                                                                                                                                                                                                                                                                                                                                                                                                                                                                                                                                                                                                                                                                                                                                                                                                                                                                                                                                                                                                                             |
| Article Type:                   | Original research                                                                                                                                                                                                                                                                                                                                                                                                                                                                                                                                                                                                                                                                                                                                                                                                                                                                                                                                                                                                                                                                  |
| Date Submitted by the Author:   | 05-Oct-2021                                                                                                                                                                                                                                                                                                                                                                                                                                                                                                                                                                                                                                                                                                                                                                                                                                                                                                                                                                                                                                                                        |
| Complete List of Authors:       | <p>Draaijer, Melvin; Amsterdam UMC Locatie VUmc, Department of Global Health</p> <p>Scheuermaier, Karine; University of the Witwatersrand Faculty of Health Sciences, Wits Sleep Laboratory, Brain Function Research Group, School of Physiology</p> <p>Lalla-Edward, Samanta Tresha; University of the Witwatersrand Faculty of Health Sciences, Ezintsha, a sub-division of Wits Reproductive Health and HIV Institute</p> <p>Fischer, Alex; University of the Witwatersrand Faculty of Health Sciences, Ezintsha, a sub-division of Wits Reproductive Health and HIV Institute</p> <p>Grobbee, Diederick; Julius Center for Health Sciences and Primary Care, Global Health Unit</p> <p>Venter, Francois; University of the Witwatersrand Faculty of Health Sciences, Ezintsha, a sub-division of Wits Reproductive Health and HIV Institute</p> <p>Vos, Alinda; Julius Center for Health Sciences and Primary Care, Global Health Unit; University of the Witwatersrand Faculty of Health Sciences, Ezintsha, a sub-division of Wits Reproductive Health and HIV Institute</p> |
| <b>Primary Subject Heading</b>: | Global health                                                                                                                                                                                                                                                                                                                                                                                                                                                                                                                                                                                                                                                                                                                                                                                                                                                                                                                                                                                                                                                                      |
| Secondary Subject Heading:      | Epidemiology, Occupational and environmental medicine                                                                                                                                                                                                                                                                                                                                                                                                                                                                                                                                                                                                                                                                                                                                                                                                                                                                                                                                                                                                                              |
| Keywords:                       | Coronary heart disease < CARDIOLOGY, Risk management < HEALTH SERVICES ADMINISTRATION & MANAGEMENT, OCCUPATIONAL & INDUSTRIAL MEDICINE, PUBLIC HEALTH                                                                                                                                                                                                                                                                                                                                                                                                                                                                                                                                                                                                                                                                                                                                                                                                                                                                                                                              |
|                                 |                                                                                                                                                                                                                                                                                                                                                                                                                                                                                                                                                                                                                                                                                                                                                                                                                                                                                                                                                                                                                                                                                    |

SCHOLARONE™  
Manuscripts





I, the Submitting Author has the right to grant and does grant on behalf of all authors of the Work (as defined in the below author licence), an exclusive licence and/or a non-exclusive licence for contributions from authors who are: i) UK Crown employees; ii) where BMJ has agreed a CC-BY licence shall apply, and/or iii) in accordance with the terms applicable for US Federal Government officers or employees acting as part of their official duties; on a worldwide, perpetual, irrevocable, royalty-free basis to BMJ Publishing Group Ltd ("BMJ") its licensees and where the relevant Journal is co-owned by BMJ to the co-owners of the Journal, to publish the Work in this journal and any other BMJ products and to exploit all rights, as set out in our [licence](#).

The Submitting Author accepts and understands that any supply made under these terms is made by BMJ to the Submitting Author unless you are acting as an employee on behalf of your employer or a postgraduate student of an affiliated institution which is paying any applicable article publishing charge ("APC") for Open Access articles. Where the Submitting Author wishes to make the Work available on an Open Access basis (and intends to pay the relevant APC), the terms of reuse of such Open Access shall be governed by a Creative Commons licence – details of these licences and which [Creative Commons](#) licence will apply to this Work are set out in our licence referred to above.

Other than as permitted in any relevant BMJ Author's Self Archiving Policies, I confirm this Work has not been accepted for publication elsewhere, is not being considered for publication elsewhere and does not duplicate material already published. I confirm all authors consent to publication of this Work and authorise the granting of this licence.

1  
2  
3  
4  
5  
6  
7  
8  
9  
10  
11  
12  
13  
14  
15  
16  
17  
18  
19  
20  
21  
22  
23  
24  
25  
26  
27  
28  
29  
30  
31  
32  
33  
34  
35  
36  
37  
38  
39  
40  
41  
42  
43  
44  
45  
46  
47  
48  
49  
50  
51  
52  
53  
54  
55  
56  
57  
58  
59  
60

1 **The influence of shift work on cardiovascular disease risk in**  
2 **Southern African long-distance truck drivers: A cross-sectional**  
3 **study**

4 M. Draaijer<sup>1</sup>, MD, K. Scheuermeier<sup>2</sup>, MD, MMSc, S.T. Lalla-Edward<sup>3</sup>, PhD, A Fischer<sup>3</sup>,  
5 MPH, D.E. Grobbee<sup>4</sup>, MD, PhD, W.D.F. Venter<sup>3</sup>, MD, PhD, FCP (SA), A.G. Vos<sup>3,4</sup>, MD, PhD

6 <sup>1</sup>Amsterdam University Medical Centers, Location VU Medical Center, Department of Global  
7 Health, Vrije Universiteit, Amsterdam, The Netherlands

8 <sup>2</sup> Wits Sleep Laboratory, Brain Function Research Group, School of Physiology, Faculty of  
9 Health Sciences, University of Witwatersrand, Johannesburg, South Africa

10 <sup>3</sup> Ezintsha, a sub-division of Wits Reproductive Health and HIV Institute, University of  
11 Witwatersrand, Johannesburg, South Africa

12 <sup>4</sup>Julius Global Health, Julius Center for Health Sciences and Primary Care, University Medical  
13 Center Utrecht, Utrecht University, Utrecht, The Netherland

14 Corresponding author:

15 Alinda G. Vos

16 Address: Universiteitsweg 100, 3584 CG Utrecht. Fax: +31 88 75 68099.

17 Email: [a.g.vos-8@umcutrecht.nl](mailto:a.g.vos-8@umcutrecht.nl)

18 Phone: +31643747335

19 **Word count**

20 Manuscript excluding title page, abstract, acknowledgements, tables and references:  
21 2634 words

1  
2  
3  
4  
5  
6  
7  
8  
9  
10  
11  
12  
13  
14  
15  
16  
17  
18  
19  
20  
21  
22  
23  
24  
25  
26  
27  
28  
29  
30  
31  
32  
33  
34  
35  
36  
37  
38  
39  
40  
41  
42  
43  
44  
45  
46  
47  
48  
49  
50  
51  
52  
53  
54  
55  
56  
57  
58  
59  
60

1 **Keywords**

2 South-Africa, cardiovascular risk factors, Framingham risk score, Atherosclerotic  
3 Cardiovascular Disease risk, Left Ventricular Hypertrophy, Carotid Intima-Media  
4 Thickness

5 **Number of figures and tables**

6 Number of tables in manuscript: 2

7 Number of tables in appendix: 16

For peer review only

## 1 **Abstract**

### 2 **Objectives:**

3 Cardiovascular disease (CVD) is a major problem globally. Truck drivers have an  
4 increased risk of CVD due to a sedentary lifestyle, irregular working hours and  
5 behavioral choices. We aimed to get insight into the contribution of night shift work  
6 to CVD risk in long-distance truck drivers in South Africa.

### 7 **Design:**

8 A cross-sectional study was performed.

### 9 **Setting:**

10 Enrollment took place at three South African truck stop locations in two provinces;  
11 Bloemfontein (Free State), Pomona Road (Gauteng), and Soweto (Gauteng).

### 12 **Participants:**

13 607 males aged 18 years and older with full-time employment as a long-distance  
14 truck driver were included. The criteria for inclusion were willingness and being able  
15 to provide informed consent and to complete the study procedures.

### 16 **Primary and secondary outcome measures:**

17 Information was collected on sociodemographics, occupational and health  
18 characteristics. Physical measurements, an electrocardiogram (ECG), and carotid  
19 intima-media thickness (CIMT) measurements were taken. A night shift was defined  
20 as working at least 3 hours between 10pm and 6am once a week. CVD risk was  
21 defined with the Framingham Risk Score (FRS), the Atherosclerotic Cardiovascular  
22 Disease (ASCVD) risk algorithm, left ventricular hypertrophy (LVH), and CIMT.

### 23 **Results:**

24 In total, 607 truck drivers were included of which 305 (50.2%) worked in day shifts  
25 only and 302 (49.8%) worked day and night shifts. There was a high prevalence of  
26 CVD risk factors in both groups as 33% were hypertensive, 28% obese and 37% had  
27 abnormal lipid levels. Working day and night shifts compared to working only day

1 shifts did not result in differences in FRS, ASCVD risk, or LVH. No difference was  
2 found in CIMT measurements, except for the maximum bulb thickness which was  
3 higher in day shift workers.

#### 4 **Conclusions:**

5 CVD risk factors are considerably present in male truck drivers in South Africa. CVD  
6 risk does not differ between dayshift and day-night shift workers in this cross-  
7 sectional analysis.

#### 8 **Article summary**

##### 9 **Strengths and limitations of this study**

- 10 • This study presents the largest cohort of male truck drivers in Africa.
- 11 • Data collection was extensive and included demographics, work and life style  
12 related risk factors for diseases as well as physical measurements
- 13 • Cardiovascular disease risk was assessed with CVD risk scores, ECG and  
14 carotid intima media measurements.
- 15 • Night shift work was defined in several ways to account for the variation of  
16 definitions in literature.
- 17 • The influence of night shift work on CVD endpoints was investigated using  
18 multivariable regression models.

##### 19 **Study approval**

20 The study was approved by the Human Research Ethics Committee (Medical) of the  
21 University of Witwatersrand (reference number M160760).

## 1 Introduction

2 Cardiovascular disease (CVD) is the number one cause of death and a leading cause  
3 of disability globally. An estimated 17.9 million people died of CVD in 2016,  
4 representing 31% of all global deaths<sup>[1,2]</sup>. Over 75% of CVD events occur in low- and  
5 middle-income countries<sup>[3]</sup>. In South Africa, CVD is responsible for approximately  
6 20% of all deaths, making it the second leading cause of death after HIV/AIDS<sup>[4,5]</sup>. The  
7 cause of CVD is multifactorial and includes behavioral factors such as smoking,  
8 physical inactivity, unhealthy dietary patterns and lifestyle related conditions such as  
9 high cholesterol, high blood pressure, high body mass index (BMI) and high waist to  
10 hip ratio<sup>[6]</sup>.

11 Irregular working hours and night shifts are risk factors for CVD. In a large systematic  
12 review and meta-analysis published in 2018, which combined the results from 21  
13 cohort and case-control studies with a total of 173.010 unique participants, CVD risk  
14 increases with 7.1% for every five years of shift work exposure after the first five  
15 years <sup>[7]</sup>. A second study shows that shift work in a cocoa processing company in  
16 Ghana is associated with risk factors of CVD such as higher BMI and higher cholesterol  
17 levels<sup>[8]</sup>. A possible reason for the increase in CVD risk may be circadian  
18 misalignment. Circadian misalignment reflects a non-optimal scheduling of  
19 behavioral and environmental cycles such as sleep/wake, fasting/feeding,  
20 rest/activity, dark/light cycles, with respect to endogenous biological processes  
21 governed by the circadian system, such as blood pressure, hormones, and  
22 inflammation factors<sup>[9]</sup>.

23 Truck drivers are a high risk population for CVD by virtue of their occupation with  
24 long working hours, frequent shift work, low physical activity and high levels of  
25 sedentary behavior. There is a high prevalence of risk factors contributing to CVD in  
26 truck drivers in South Africa such as smoking, obesity, hypercholesterolemia,  
27 hypertension, and abnormal glucose levels<sup>[10,11]</sup>. This study aims to gain insight into  
28 the contribution of night shift work to CVD risk in long-distance truck drivers in South

1  
2  
3 1 Africa by comparing truck drivers who work day shifts only to truck drivers who  
4 2 work day and night shifts.

### 3 **Methods**

#### 4 **Study design and setting**

5 This analysis is a secondary data analysis of The Trucker Health Survey (THS). The  
6 THS was an initiative of the Wits Reproductive Health and HIV Institute (Wits RHI), a  
7 department of the University of the Witwatersrand, and North-Star Alliance (NSA).  
8 NSA provided health care services to truck drivers through a network of Roadside  
9 Wellness Centers located at busy truck stops and at border crossings<sup>[12]</sup>. Methods and  
10 characteristics of the THS have been described previously<sup>[13]</sup>. Enrollment took place  
11 between October 2016 and March 2017 in three South African locations in two  
12 provinces; Bloemfontein (Free State), Pomona Road (Gauteng), and Soweto  
13 (Gauteng). The truck stop in Soweto was added from January to March 2017 to reach  
14 a sufficient number of South African participants. Information was collected during a  
15 single visit.

16 The study was approved by the Research Ethics Committee of the University of the  
17 Witwatersrand (reference number M160760). Participation was voluntary, and  
18 written informed consent was obtained by a research nurse or counselor who spoke  
19 the same language as the participant.

#### 20 **Study population and inclusion criteria**

21 Males aged 18 years and older with full-time employment as a long-distance truck  
22 driver were included. The criteria for inclusion were willingness and being able to  
23 provide informed consent and to complete the study procedures. All participants with  
24 data on shift work available were eligible for this analysis.

## 1 Patient and Public involvement statement

2 Patients and the public were not involved in the study design, or in the recruitment  
3 to and conduct of the study. Results cannot be disseminated to study participants  
4 directly due to insufficient contact information.

## 5 Evaluation

6 Information on socio-demographic (i.e., age, education, country of origin, marital  
7 status), occupational (i.e., time spent working, working night shifts), behavioral (i.e.,  
8 smoking status, physical activity, sleep duration per day) and health (i.e., HIV status,  
9 diabetes treatment, hypertension treatment) characteristics were collected using  
10 validated questionnaires<sup>[14-17]</sup>. An overview of the survey and all questionnaires that  
11 have been used can be found in the previously published methodology paper<sup>[13]</sup>. The  
12 main definition for night shifts was working at least three hours once a week between  
13 10pm and 6am, the remaining was defined as dayshift workers. Night shift truck  
14 drivers worked either one night shift a week, two to three night shifts a week or more  
15 than four night shifts a week. We used those different cut-offs in a sensitivity analysis  
16 to investigate whether an increased number of nights shifts would be associated with  
17 increased CVD risk.

18 CVD risk was defined with four different outcome measures namely the Framingham  
19 Risk Score (FRS), the Atherosclerotic Cardiovascular Disease (ASCVD) risk algorithm,  
20 left ventricular hypertrophy (LVH) on electrocardiogram (ECG) and carotid intima-  
21 media thickness (CIMT)<sup>[18,19]</sup>.

22 Physical measurements included measurement of blood pressure, waist and hip  
23 circumference, height and weight. Blood was collected for measurement of total  
24 cholesterol, high-density-lipoprotein (HDL) cholesterol, low-density-lipoprotein  
25 (LDL) cholesterol, triglycerides (TG), random glucose and creatinine. Blood pressure  
26 was categorized as normal, pre-hypertension and hypertension<sup>[20]</sup>. Cut-off points for  
27 glucose and cholesterol were chosen according to international guidelines<sup>[21,22]</sup>.



1  
2  
3 1 Estimated glomerular filtration rate (eGFR) was calculated using creatinine levels and  
4 presented in stages of chronic kidney disease<sup>[23]</sup>.

5  
6  
7  
8 3 CVD risk according to the FRS was calculated and categorized in low-, intermediate-  
9 and high-CVD risk<sup>[18,24]</sup>. The ASCVD risk algorithm was calculated for participants  
10 between the age of 40 to 70 according to algorithm guidelines<sup>[19,22]</sup>.

11  
12  
13  
14 6 A standard 12 lead ECG was performed by a trained nurse with a computer-based  
15 ECG device (SE-1515 DP12, EDAN)<sup>[25]</sup> to record heart rate, rhythm and conduction  
16 time. LVH was assessed using Cornell's voltage ( $RaVL+SV_3$ ), Cornell's product  
17  $((RaVL+SV_3) \times QRS \text{ duration})$  and Sokolow-Lyon's voltage ( $SV_1+RV_5$ ). LVH was  
18 defined as Cornell's voltage  $\geq 28\text{mV}$ , Cornell's product  $> 2440 \text{ mV}\cdot\text{ms}$  or Sokolow-  
19 Lyon's voltage  $\geq 35\text{mV}$ <sup>[26-29]</sup>. The combined outcome of LVH was deemed positive if  
20 one or more criteria indicated LVH.

21  
22  
23  
24  
25  
26  
27 13 CIMT was measured in 217 (42.9%) participants, dependent on the availability of a  
28 sonographer. A Siemens Acuson p500 ultrasound (Siemens Healthcare (Pty) Ltd,  
29 South Africa) with a  $\geq 7\text{mHz}$  linear probe was used. Measurements of the near wall  
30 and the far wall of the common carotid artery (CCA) were taken at three standardized  
31 angles each side using the Meijer's Arc<sup>[30]</sup>. At bulb level, the far wall was measured at  
32 the best visible angle at both sides. The images were analyzed off-line in batch with  
33 the semi-automatically Artery Measurement System software (Chalmers University,  
34 Göteborg, Sweden). The mean of the mean common carotid artery intima-media  
35 thickness (CCA-IMT) and the max of the mean CCA-IMT were calculated by averaging  
36 the near and far wall measurements across the three angles on both sides. Mean-max  
37 bulb IMT was calculated using bilateral measurements of the bulb far wall. A mean  
38 CCA-IMT of  $> 1.0\text{mm}$  at any of the measured angles was considered a carotid  
39 plaque<sup>[31,32]</sup>.

## 26 **Statistical analysis**

27 Analyses were done using SPSS version 25.0 (SPSS Inc. Chicago, IL, USA). A  $p \leq 0.05$   
28 was considered to be statistically significant. Categorical variables were represented

1 as counts with percentages. All continuous outcomes were non-normally distributed  
2 and summarized using median with interquartile range (IQR). Non-normally  
3 distributed data was transformed using the Box-Cox technique combined with a  
4 goodness of fit test using normal, lognormal and exponential distributions. To test for  
5 differences between day and night shift workers a Chi-square test was used for  
6 categorical variables and a Mann-Whitney-U test was used for continuous variables.  
7 Linear regression for FRS, ASCVD risk and mean CCA-IMT was done after  
8 transformation to meet criteria for normal distribution. Binomial logistic regression  
9 was used to assess the influence of night shift work on the occurrence of LVH.  
10 Variables considered as confounders for all outcomes were age, country of origin,  
11 education level and relationship status<sup>[33]</sup>. We did not adjust for known CVD risk  
12 factors as our outcomes represent the cumulative effect of CVD risk factors. The aim  
13 is to investigate CVD risk differences between the groups, and not the contribution of  
14 individual CVD risk factors to our endpoints. Variables were included in multivariable  
15 analysis if the p-value was  $\leq 0.20$  in univariable analysis. Age was added to the  
16 multivariable model independent of the p-value in univariable analysis.

17 In a sensitivity analysis, above described analyses were repeated using different cut-  
18 off points for night shift work, namely one night shift a week, two to three night shifts  
19 a week or four or more night shifts a week. Finally, all analyses were repeated  
20 including only truck drivers who had been working as a truck driver for more than  
21 10 years (n = 229 out of 607).

## 22 Results

23 In total, 614 male truck drivers completed the survey, of which 607 (99%) had data  
24 on shift work available. Nearly half (n=305, 50.2%) worked in day shifts only and 302  
25 drivers (49.8%) worked both day and night shifts (Table 1).

26 There were no drivers who only worked night shifts. The median age was 37 (IQR:  
27 31-42) years. The majority of the drivers were from Zimbabwe (62.5%), followed by  
28 South Africa (20.2%). The drivers had worked for a median duration of 9 (IQR: 5-14)

1 years as a truck driver. There was a high prevalence of CVD risk factors in both groups  
2 as 28% of participants were obese, 33% hypertensive and >35% had abnormal LDL  
3 and TG levels. No significant differences were seen between the groups for most of  
4 the CVD risk factors. The day-night shift group had a higher activity score ( $p = 0.02$ ),  
5 higher neck circumference ( $p < 0.01$ ) and a lower waist to hip ratio ( $p = 0.03$ ) than  
6 the participants who worked day shifts only.

7 Shift work was borderline associated with a difference in FRS ( $p = 0.05$ ) as continuous  
8 outcome, but there was no difference between the groups when categorized in low,  
9 intermediate and high risk ( $p = 0.57$ ).

10 Shift work was not associated with ASCVD risk score ( $p = 0.94$ ), LVH occurrence (all  
11  $p > 0.20$ ) or CIMT, except for max bulb IMT, which was higher in day shift workers  
12 compared to day-night shift workers ( $p < 0.01$ ) (Table 2).

13 Factors associated with higher FRS and ASCVD in multivariable analysis were  
14 increasing age ( $p < 0.01$  for both), having finished primary school or less ( $p = 0.01$  and  
15  $p < 0.01$  respectively), and a stable relationship ( $p < 0.01$  for both). An increase in age  
16 ( $p < 0.01$ ) was associated with an increase in mean CCA-IMT. A stable relationship  
17 was positively associated with LVH ( $p < 0.01$ ) (Appendix 1).

18 Repeating the analysis using different definitions for night shift work resulted in the  
19 same findings (Appendix 2-3). Limiting the analysis to truck drivers who had been  
20 working as a truck driver for more than 10 years ( $n=229$ ) did also not show a  
21 difference in CVD outcomes between day and day/night shift workers (Appendix 4).

## 22 Discussion

23 Our study provides insight into the role of shift work on CVD risk in truck drivers in  
24 South Africa and possibly sub-Saharan Africa. We did not find an association between  
25 shift work and CVD risk according to the FRS strata, the ASCVD risk score, LVH, and  
26 CIMT.

1 Our results are in line with recent studies done in cohorts of hospital workers. A study  
2 including female hospital employees showed that shiftwork was not directly linked  
3 to CVD risk<sup>[34]</sup>. Another study on health care workers employed in hospitals found no  
4 difference in metabolic risk factors between day and night shift workers<sup>[35]</sup>. Similar  
5 results were seen in a Finnish cohort study with a 20-year follow-up period as no  
6 association between shift work and cardiovascular morbidity was observed<sup>[36]</sup>.

7 However, other studies did find an increased CVD risk for night shift workers. In a  
8 systematic review and meta-analysis, shift work for more than five years had a  
9 positive and significant dose-response relationship on CVD risk. Shift work less than  
10 five years did not have a relation with CVD risk<sup>[7]</sup>. Another study, also a systematic  
11 review and meta-analysis, demonstrated that an increase in shift work of five years  
12 was associated with a five percent increase in the risk of CVD<sup>[37]</sup>. A third single site  
13 study with nearly 2000 participants showed that in male petrochemical plant  
14 workers, exposure to night shift work for over 20 years leads to a significant higher  
15 risk of getting hypertension<sup>[38]</sup>. Our study lacked data on intensity and duration of  
16 nightshifts so a dose-response relationship could not be investigated. Secondly, the  
17 group of truck drivers in our dataset who worked longer than 20 years was too small  
18 to do additional analysis.

19 Our findings on the abundance of CVD risk factors are in line with other studies that  
20 showed that CVD risk factors are notably present in truck drivers<sup>[39,40]</sup>. In the South  
21 African Demographic and Health Survey including almost 14.000 participants with a  
22 mean age of 38.5 years, the overall prevalence of hypertension was 30% and the  
23 prevalence of obesity was 20%<sup>[41]</sup>. In a population study in the northern part of South  
24 Africa, including 3641 participants (64% males, median age <30 years), 30% of the  
25 men had hypertension, 5% were obese and up to 20% had disturbances in lipid  
26 levels<sup>[42]</sup>.

27 In our population the mean age was 37.6 years. Hypertension occurred in 33% of the  
28 participants, and 28% were obese. In our study up to 37% of the participants had  
29 abnormal lipid levels. To summarize, it seems that in our study there is a comparable

1 percentage of hypertension, but increased percentage of obesity and abnormal  
2 cholesterol levels compared to the general population.

3 Some limitations need to be mentioned. The first relates to our definition of night  
4 shifts, as only 3 hours of work between 10pm and 6am classified someone as a night  
5 shift worker. To account for this, we did additional sensitivity analyses using different  
6 cut-offs for the number of nights worked in a week. Unfortunately we did not have  
7 information on the exact number of hours worked per night nor did we have  
8 information on the time a driver had been involved in shiftwork. This limits our  
9 analysis on the dose-response relationship between shiftwork and CVD risk.

10 Another limitation is potential bias due to the healthy worker effect. Workers who  
11 are relatively fitter might do night shifts more often and will continue to do night  
12 shifts for a longer period of time. More unhealthy workers might possibly switch to  
13 day shifts only or to a different job. Although CVD risk factors did not differ between  
14 day and night shift workers there might be unmeasured risk factors leading to an  
15 underestimation of the influence of night shift work on CVD risk.

16 The combined LVH outcome may result in an overestimation of the number of  
17 participants without also conducting cardiac echocardiography which is considered  
18 the gold standard measure. CIMT data were only available for 43% of the participants.  
19 This limits the power, but as CIMT scans were omitted randomly and the number of  
20 missing scans was evenly divided over the groups, we do not expect that this would  
21 result in a bias.

22 A major strength of this study is the size of the study with 607 truck drivers, of whom  
23 half were working day-night shifts. This is the largest cohort of male truck drivers in  
24 South Africa and to the best of our knowledge, the largest in Africa. Our data  
25 represents the situation in the general truck driver community in South Africa and  
26 beyond as drivers from several African countries were included at public truck stops.  
27 Another strength is that we defined CVD risk in complementary ways using four

1 different outcome measures namely FRS, ASCVD, LVH on ECG and CIMT in  
2 combination with the wide variety of physical measurements.

### 3 **Conclusion**

4 CVD risk factors are abundantly present in male long-haul truck drivers in South  
5 Africa. CVD risk does not differ between dayshift and day-night shift workers in this  
6 cross-sectional analysis. Nevertheless, the high prevalence of CVD risk factors in this  
7 male cohort necessitates further investigation to develop and implement strategies  
8 to reduce CVD risk.

### 9 **Author contributions**

10 Designed the study: MD, AGV, WDFV, DEG. Analysed the data and interpreted results:  
11 MD, KS, AGV. Wrote the initial draft: MD, AGV. All authors critically reviewed and  
12 approved of the final draft.

### 13 **Conflict of interest statement**

14 The authors declare that there is no conflict of interest.

### 15 **Funding**

16 This work was funded by North Star Alliance through a research and implementation  
17 grant received from the Ministry of Foreign Affairs of the Netherlands, managed by  
18 the Royal Dutch Embassy of Mozambique. The Amsterdam Institute for Global Health  
19 and Development (AIGHD) and Wits RHI held separate contracts with North Star  
20 Alliance (AIGHD's grant reference: 0068 North Star – NSCDP; WRHI's grant number:  
21 D1404070).

1  
2  
3 1 The views of this study are those of the authors and do not necessarily reflect the  
4 2 views of any of the funders or the South African and Dutch governments.

### 3 **Data availability statement**

4 Deidentified participant data are available upon reasonable request by contacting  
5 the corresponding author.

### 6 **Study approval**

7 The study was approved by the Human Research Ethics Committee (Medical) of the  
8 University of Witwatersrand (reference number M160760).

### 9 **References**

- 10 1. Goff Jr DC, Lloyd-Jones DM, Bennett G, et al. 2013 ACC/AHA guideline on the  
11 assessment of cardiovascular risk: a report of the American College of  
12 Cardiology/American Heart Association Task Force on Practice Guidelines. J  
13 Am Coll Cardiol. 2014;63(25 Pt B):2935-2959.  
14 doi:10.1016/j.jacc.2013.11.005
- 15 2. Benjamin EJ, Blaha MJ, Chiuve SE, et al. Heart Disease and Stroke Statistics-  
16 2017 Update: A Report From the American Heart Association. Circulation.  
17 2017;135(10):e146-e603. doi:10.1161/CIR.0000000000000485
- 18 3. WHO. Cardiovascular diseases fact sheet. Geneva: World Health Organization,  
19 May 2017. [https://www.who.int/news-room/fact-](https://www.who.int/news-room/fact-sheets/detail/cardiovascular-diseases-(cvds))  
20 [sheets/detail/cardiovascular-diseases-\(cvds\)](https://www.who.int/news-room/fact-sheets/detail/cardiovascular-diseases-(cvds)). Accessed February 4, 2019.
- 21 4. Wyk VP, Msemburi W, Laubscher R, et al. Second National Burden of Disease  
22 Study South Africa: national and subnational mortality trends, 1997-2009.  
23 Lancet. 2013;381:S113. doi:10.1016/S0140-6736(13)61367-7
- 24 5. Mortality and causes of death in South Africa, 2016: Findings from death  
25 notification / Statistics South Africa. Pretoria: Statistics South Africa, 2016.  
26 <http://www.statssa.gov.za/publications/P03093/P030932016.pdf>. Accessed  
27 February 5, 2019.

- 1 6. Kannel WB, Dawber TR, Kagan A, Revotskie N, Stokes III J. Factors of Risk in  
2 the Development of Coronary Heart Disease—Six-Year Follow-up  
3 Experience: The Framingham Study. *Ann Intern Med.* 1961;55(1):33-50.  
4 doi:10.7326/0003-4819-55-1-33
- 5 7. Torquati L, Mielke GI, Brown WJ, Kolbe-Alexander T. Shift work and the risk  
6 of cardiovascular disease. A systematic review and meta-analysis including  
7 dose-response relationship. *Scand J Work Environ Heal.* 2018;44(3):229-238.  
8 doi:10.5271/sjweh.3700
- 9 8. Asare-Anane H, Abdul-Latif A, Ofori EK, Abdul-Rahman M, Amanquah SD.  
10 Shift work and the risk of cardiovascular disease among workers in cocoa  
11 processing company, Tema. *BMC Res Notes.* 2015. doi:10.1186/s13104-015-  
12 1750-3
- 13 9. Morris CJ, Yang JN, Scheer FAJL. The impact of the circadian timing system on  
14 cardiovascular and metabolic function. *Prog Brain Res.* 2012;199:337-358.  
15 doi:10.1016/B978-0-444-59427-3.00019-8
- 16 10. Robinson CF, Burnett CA. Truck drivers and heart disease in the United  
17 States, 1979–1990. *Am J Ind Med.* 2005;47(2):113-119.  
18 doi:10.1002/ajim.20126
- 19 11. Birdsey J, Sieber WK, Chen GX, et al. National Survey of US Long-Haul Truck  
20 Driver Health and Injury: Health Behaviors. *J Occup Environ Med.*  
21 2015;57(2).
- 22 12. Lalla-Edward ST, Ncube S, Matthew P, Hankins CA, Venter WDF, Gomez GB.  
23 Uptake of health services among truck drivers in South Africa: Analysis of  
24 routine data from nine roadside wellness centres. *BMC Health Serv Res.*  
25 2017. doi:10.1186/s12913-017-2595-3
- 26 13. Lalla-Edward ST, Fischer AE, Venter WDF, et al. Cross-sectional study of the  
27 health of southern African truck drivers. *BMJ Open.* 2019;9(10):e032025.  
28 doi:10.1136/bmjopen-2019-032025
- 29 14. Creel AH, Rimal RN. Factors related to HIV-testing behavior and interest in  
30 testing in Namibia. *AIDS Care.* 2011;23(7):901-907.  
31 doi:10.1080/09540121.2010.540227



- 1 15. Buysse DJ, Reynolds CF, Monk TH, Berman SR, Kupfer DJ. The Pittsburgh  
2 sleep quality index: A new instrument for psychiatric practice and research.  
3 Psychiatry Res. 1989;28(2):193-213. doi:[https://doi.org/10.1016/0165-  
4 1781\(89\)90047-4](https://doi.org/10.1016/0165-1781(89)90047-4)
- 5 16. Amireault S, Godin G. The Godin-Shephard leisure-time physical activity  
6 questionnaire: Validity evidence supporting its use for classifying healthy  
7 adults into active and insufficiently active categories. Percept Mot Skills.  
8 2015. doi:[10.2466/03.27.PMS.120v19x7](https://doi.org/10.2466/03.27.PMS.120v19x7)
- 9 17. World Health Organization (2005). WHO STEPS Surveillance Manual: The  
10 WHO STEPwise approach to chronic disease risk factor surveillance. Geneva,  
11 World Health Organization.
- 12 18. D'Agostino RB, Vasan RS, Pencina MJ, et al. General cardiovascular risk  
13 profile for use in primary care: The Framingham heart study. Circulation.  
14 2008. doi:[10.1161/CIRCULATIONAHA.107.699579](https://doi.org/10.1161/CIRCULATIONAHA.107.699579)
- 15 19. Lloyd-Jones DM, Huffman MD, Karmali KN, et al. Estimating Longitudinal  
16 Risks and Benefits From Cardiovascular Preventive Therapies Among  
17 Medicare Patients: The Million Hearts Longitudinal ASCVD Risk Assessment  
18 Tool: A Special Report From the American Heart Association and American  
19 College of Cardiol. J Am Coll Cardiol. 2017;69(12):1617-1636.  
20 doi:<https://doi.org/10.1016/j.jacc.2016.10.018>
- 21 20. Chobanian A V., Bakris GL, Black HR, et al. Seventh report of the Joint  
22 National Committee on Prevention, Detection, Evaluation, and Treatment of  
23 High Blood Pressure. Hypertension. 2003.  
24 doi:[10.1161/01.HYP.0000107251.49515.c2](https://doi.org/10.1161/01.HYP.0000107251.49515.c2)
- 25 21. NICE. Type 2 diabetes in adults: management. Natl Inst Heal Care Excell.  
26 2018.
- 27 22. Grundy SM, Stone NJ, Bailey AL, et al. 2018  
28 AHA/ACC/AACVPR/AAPA/ABC/ACPM/ADA/AGS/APhA/ASPC/NLA/PCNA  
29 Guideline on the Management of Blood Cholesterol: A Report of the American  
30 College of Cardiology/American Heart Association Task Force on Clinical

- 1  
2  
3 1 Practice Guidelines. *J Am Coll Cardiol*. 2018.  
4  
5 2 doi:<https://doi.org/10.1016/j.jacc.2018.11.003>  
6  
7 3 23. Levey AS, Bosch JP, Lewis JB, Greene T, Rogers N, Roth D. A more accurate  
8  
9 4 method to estimate glomerular filtration rate from serum creatinine: a new  
10  
11 5 prediction equation. Modification of Diet in Renal Disease Study Group. *Ann*  
12  
13 6 *Intern Med*. 1999.  
14  
15 7 24. Sytkowski PA, Kannel WB, D'Agostino RB. Changes in Risk Factors and the  
16  
17 8 Decline in Mortality from Cardiovascular Disease. *N Engl J Med*.  
18  
19 9 1990;322(23):1635-1641. doi:10.1056/NEJM199006073222304  
20  
21 10 25. Alfakih K, Walters K, Jones T, Ridgway J, S. HA, Mohan S. New Gender-Specific  
22  
23 11 Partition Values for ECG Criteria of Left Ventricular Hypertrophy.  
24  
25 12 *Hypertension*. 2004;44(2):175-179.  
26  
27 13 doi:10.1161/01.HYP.0000135249.66192.30  
28  
29 14 26. Casale PN, Devereux RB, Alonso DR, Campo E, Kligfield P. Improved sex-  
30  
31 15 specific criteria of left ventricular hypertrophy for clinical and computer  
32  
33 16 interpretation of electrocardiograms: Validation with autopsy findings.  
34  
35 17 *Circulation*. 1987. doi:10.1161/01.CIR.75.3.565  
36  
37 18 27. Devereux RB, Casale PN, Eisenberg RR, Miller DH, Kligfield P.  
38  
39 19 Electrocardiographic detection of left ventricular hypertrophy using  
40  
41 20 echocardiographic determination of left ventricular mass as the reference  
42  
43 21 standard: Comparison of standard criteria, computer diagnosis and physician  
44  
45 22 interpretation. *J Am Coll Cardiol*. 1984. doi:10.1016/S0735-1097(84)80433-  
46  
47 23 7  
48  
49 24 28. Sokolow M, Lyon TP. The ventricular complex in left ventricular hypertrophy  
50  
51 25 as obtained by unipolar precordial and limb leads. *Am Heart J*. 1949.  
52  
53 26 doi:10.1016/0002-8703(49)90562-1  
54  
55 27 29. Okin PM, Roman MJ, Devereux RB, Kligfield P. Electrocardiographic  
56  
57 28 identification of increased left ventricular mass by simple voltage-duration  
58  
59 29 products. *J Am Coll Cardiol*. 1995. doi:10.1016/0735-1097(94)00371-V  
60  
30 30. Bots ML, Evans GW, Tegeler CH, Meijer R. Carotid Intima-media Thickness  
31  
Measurements: Relations with Atherosclerosis, Risk of Cardiovascular

- 1  
2  
3 1 Disease and Application in Randomized Controlled Trials. *Chin Med J (Engl)*.  
4 2016;129(2):215-226. doi:10.4103/0366-6999.173500  
5 2  
6 31. Boulos NM, Gardin JM, Malik S, Postley J, Wong ND. Carotid Plaque  
7 4 Characterization, Stenosis, and Intima-Media Thickness According to Age and  
8 5 Gender in a Large Registry Cohort. *Am J Cardiol*. 2016;117(7):1185-1191.  
9 6 doi:10.1016/j.amjcard.2015.12.062  
10 7 32. Naqvi TZ, Lee M-S. Carotid Intima-Media Thickness and Plaque in  
11 8 Cardiovascular Risk Assessment. *JACC Cardiovasc Imaging*. 2014;7(10):1025-  
12 9 1038. doi:https://doi.org/10.1016/j.jcmg.2013.11.014  
13 10 33. Kiecolt-Glaser JK, Newton TL. Marriage and health: His and hers. *Psychol Bull*.  
14 11 2001. doi:10.1037/0033-2909.127.4.472  
15 12 34. Lajoie P, Aronson KJ, Day A, Tranmer J. A cross-sectional study of shift work,  
16 13 sleep quality and cardiometabolic risk in female hospital employees. *BMJ*  
17 14 *Open*. 2015. doi:10.1136/bmjopen-2014-007327  
18 15 35. Loef B, Van Baarle D, Van Der Beek AJ, Beekhof PK, Van Kerkhof LW, Proper  
19 16 KI. The association between exposure to different aspects of shift work and  
20 17 metabolic risk factors in health care workers, and the role of chronotype.  
21 18 *PLoS One*. 2019. doi:10.1371/journal.pone.0211557  
22 19 36. Wang A, Arah OA, Kauhanen J, Krause N. Shift work and 20-year incidence of  
23 20 acute myocardial infarction: Results from the Kuopio Ischemic Heart Disease  
24 21 Risk Factor Study. *Occup Environ Med*. 2016. doi:10.1136/oemed-2015-  
25 22 103245  
26 23 37. Wang D, Ruan W, Chen Z, Peng Y, Li W. Shift work and risk of cardiovascular  
27 24 disease morbidity and mortality: A dose-response meta-analysis of cohort  
28 25 studies. *Eur J Prev Cardiol*. 2018. doi:10.1177/2047487318783892  
29 26 38. Yeom JH, Sim CS, Lee J, et al. Effect of shift work on hypertension: Cross  
30 27 sectional study. *Ann Occup Environ Med*. 2017. doi:10.1186/s40557-017-  
31 28 0166-z  
32 29 39. Sieber WK, Robinson CF, Birdsey J, et al. Obesity and other risk factors: the  
33 30 national survey of U.S. long-haul truck driver health and injury. *Am J Ind Med*.  
34 31 2014;57(6):615-626. doi:10.1002/ajim.22293

Table 1. Characteristics of the study population

|                                                      | <b>Participants<br/>(n=607)</b> | <b>Day shifts<br/>(n=305)</b> | <b>Day-night shifts<br/>(n=302)</b> |
|------------------------------------------------------|---------------------------------|-------------------------------|-------------------------------------|
| Age (years), median (IQR)                            | 37 (31-42)                      | 37 (32-43)                    | 36 (30-42)                          |
| Country of origin, n                                 | 605                             | 303                           | 302                                 |
| Zimbabwe, n (%)                                      | 378 (62.5%)                     | 188 (62.0%)                   | 190 (62.9%)                         |
| South Africa, n (%)                                  | 122 (20.2%)                     | 60 (19.8%)                    | 62 (20.5%)                          |
| Zambia, n (%)                                        | 45 (7.4%)                       | 24 (7.9%)                     | 21 (7.0%)                           |
| Other, n (%)                                         | 60 (9.9%)                       | 31 (10.2%)                    | 29 (9.6%)                           |
| Working as driver (years), median (IQR)              | 9 (5-14)                        | 9 (5-14)                      | 8 (5-14)                            |
| Time spent working per month (days),<br>median (IQR) | 20 (15-24)                      | 20 (18-24)                    | 20 (15-24)                          |
| Time sleeping/day (hours), median (IQR)              | 8 (6-9)                         | 8 (6-9)                       | 7.5 (6-9)                           |
| Education level, n                                   | 585                             | 287                           | 298                                 |
| Primary school or less, n (%)                        | 51 (8.7%)                       | 32 (11.1%)                    | 19 (6.4%)                           |
| Secondary school, n (%)                              | 322 (55.0%)                     | 150 (52.3%)                   | 172 (57.7%)                         |
| Matrix/college/university, n (%)                     | 212 (36.2%)                     | 105 (36.6%)                   | 107 (35.9%)                         |
| Marital status, n                                    | 607                             | 305                           | 302                                 |
| Stable relationship, n (%)                           | 545 (89.8%)                     | 278 (91.1%)                   | 267 (88.4%)                         |

- 1 40. Korelitz JJ, Fernandez AA, Uyeda VJ, Spivey GH, Browdy BL, Schmidt RT.  
2 Health habits and risk factors among truck drivers visiting a health booth  
3 during a trucker trade show. *Am J Heal Promot.* 1993. doi:10.4278/0890-  
4 1171-8.2.117
- 5 41. Kandala NB, Tigbe W, Manda SO, Stranges S. Geographic variation of  
6 hypertension in sub-Saharan Africa: A case study of South Africa. *Am J*  
7 *Hypertens.* 2013. doi:10.1093/ajh/hps063
- 8 42. Clark SJ, Gómez-Olivé FX, Houle B, et al. Cardiometabolic disease risk and HIV  
9 status in rural South Africa: Establishing a baseline. *BMC Public Health.* 2015.  
10 doi:10.1186/s12889-015-1467-1

|                                                 |                  |                  |                  |
|-------------------------------------------------|------------------|------------------|------------------|
| No relationship, n (%)                          | 62 (10.2%)       | 27 (8.9%)        | 35 (11.6%)       |
| HIV positive, n (%)                             | 54 (8.9%)        | 24 (7.9%)        | 30 (9.9%)        |
| Weekly leisure activity score, median (IQR)     | 17 (0-27)        | 17 (0-19)        | 17 (0-31)        |
| Body mass index (kg/cm <sup>2</sup> ), n        | 597              | 298              | 299              |
| Body mass index < 30 kg/cm <sup>2</sup> , n (%) | 428 (71.7%)      | 220 (73.8%)      | 208 (69.6%)      |
| Body mass index ≥ 30 kg/cm <sup>2</sup> , n (%) | 169 (28.3%)      | 78 (26.2%)       | 91 (30.4%)       |
| Waist to hip ratio, median (IQR)                | 0.86 (0.81-0.91) | 0.87 (0.82-0.92) | 0.85 (0.80-0.91) |
| Neck circumference (cm), median (IQR)           | 37 (36-39)       | 37 (35-39)       | 38 (36-40)       |
| Smoking ever in life, n (%)                     | 90 (14.9%)       | 47 (15.6%)       | 43 (14.2%)       |
| Family history for CVD, n (%)                   | 32 (5.3%)        | 14 (4.7%)        | 18 (6.0%)        |
| Heart rate (bpm), median (IQR)                  | 75 (66-83)       | 75 (68-83)       | 75 (65-83)       |
| Blood pressure classification, n                | 594              | 297              | 297              |
| Normal, n (%)                                   | 100 (16.8%)      | 43 (14.5%)       | 57 (19.2%)       |
| Pre-hypertension <sup>a</sup> , n (%)           | 297 (50.0%)      | 159 (53.5%)      | 138 (46.5%)      |
| Hypertension <sup>b</sup> or Tx, n (%)          | 197 (33.2%)      | 95 (32.0%)       | 102 (34.3%)      |
| Serum glucose, n                                | 457              | 234              | 223              |
| ≥ 7.8mmol/L or Tx, n (%)                        | 38 (8.3%)        | 18 (7.7%)        | 20 (9.0%)        |
| < 7.8mmol/L, n (%)                              | 419 (91.7%)      | 216 (92.3%)      | 203 (91.0%)      |
| Serum Creatinine                                | 586              | 296              | 290              |
| ≥ 110 mmol/L, n (%)                             | 102 (17.4%)      | 58 (19.6%)       | 44 (15.2%)       |
| < 110 mmol/L, n (%)                             | 484 (82.6%)      | 238 (80.4%)      | 246 (84.8%)      |
| eGFR <sup>c</sup>                               | 586              | 296              | 290              |
| ≥ 90ml/min/1.73m <sup>2</sup> , n (%)           | 440 (75.1%)      | 212 (71.6%)      | 228 (78.6%)      |
| 60-90ml/min/1.73m <sup>2</sup> , n (%)          | 139 (23.7%)      | 80 (27.0%)       | 59 (20.3%)       |
| < 60ml/min/1.73m <sup>2</sup> , n (%)           | 7 (1.2%)         | 4 (1.4%)         | 3 (1.1%)         |
| Total cholesterol                               | 587              | 296              | 291              |
| ≥ 5.17 mmol/L, n (%)                            | 140 (23.9%)      | 77 (26.0%)       | 63 (21.6%)       |
| < 5.17 mmol/L, n (%)                            | 447 (76.1%)      | 219 (74.0%)      | 228 (78.4%)      |
| HDL cholesterol                                 | 587              | 296              | 291              |
| ≤ 1.04 mmol/L, n (%)                            | 151 (25.7%)      | 79 (26.7%)       | 72 (24.7%)       |
| > 1.04 mmol/L, n (%)                            | 436 (74.3%)      | 217 (73.3%)      | 219 (75.3%)      |
| LDL cholesterol                                 | 587              | 296              | 291              |

|                                                                                                                                                                                                        |                     |             |             |             |
|--------------------------------------------------------------------------------------------------------------------------------------------------------------------------------------------------------|---------------------|-------------|-------------|-------------|
|                                                                                                                                                                                                        | ≥ 3.0 mmol/L, n (%) | 217 (37.0%) | 113 (38.2%) | 104 (35.7%) |
|                                                                                                                                                                                                        | < 3.0 mmol/L, n (%) | 370 (63.0%) | 183 (61.8%) | 187 (64.3%) |
| Triglycerides                                                                                                                                                                                          |                     | 587         | 296         | 291         |
|                                                                                                                                                                                                        | ≥ 1.7 mmol/L, n (%) | 211 (35.9%) | 116 (39.2%) | 95 (32.6%)  |
|                                                                                                                                                                                                        | < 1.7 mmol/L, n (%) | 376 (64.1%) | 180 (60.8%) | 196 (67.4%) |
| Abbreviations: P: p-value; IQR: Interquartile range; bpm: beats per minute; Tx: on medication; eGFR: estimated glomerular filtration rate; HDL: High-density-lipoprotein; LDL: Low-density-lipoprotein |                     |             |             |             |
| a: Systolic blood pressure >120mmHg and/or diastolic blood pressure >80mmHg                                                                                                                            |                     |             |             |             |
| b: Systolic blood pressure >140mmHg and/or diastolic blood pressure >90mmHg                                                                                                                            |                     |             |             |             |
| c: Calculated using: $186 \times (\text{Creatinine}/88.4)^{-1.154} \times (\text{Age})^{-0.203} \times (0.742 \text{ if female}) \times (1.210 \text{ if black African})$                              |                     |             |             |             |

1

Table 2. Descriptive statistics of cardiovascular risk assessments

|                                                  | Participants<br>(n=607) | Day shifts<br>(n=305) | Day-night shifts<br>(n=302) | P           |
|--------------------------------------------------|-------------------------|-----------------------|-----------------------------|-------------|
| Framingham risk score                            |                         |                       |                             |             |
| 10-year Framingham risk percentage, n            | 585                     | 295                   | 290                         | <b>0.05</b> |
| 10-year Framingham risk percentage, median (IQR) | 3.21 (1.66-5.99)        | 3.52 (1.95-6.23)      | 2.98 (1.47-5.56)            |             |
| Low risk (< 10%), n (%)                          | 518 (88.5%)             | 265 (89.8%)           | 253 (87.2%)                 |             |
| Intermediate risk (10-20%), n (%)                | 52 (9.0%)               | 24 (8.1%)             | 28 (9.7%)                   |             |
| High risk (> 20%), n (%)                         | 15 (2.5%)               | 6 (2.0%)              | 9 (3.1%)                    |             |
| ASCVD risk score                                 |                         |                       |                             |             |
| 10-year ASCVD risk percentage, n                 | 215                     | 111                   | 104                         | 0.94        |
| 10-year ASCVD risk percentage, median (IQR)      | 5.13 (3.62-7.20)        | 5.16 (3.64-6.66)      | 5.12 (3.57-7.63)            |             |
| Low risk (< 5%), n (%)                           | 103 (47.9)              | 54 (48.6%)            | 49 (47.1%)                  |             |
| Intermediate risk (5-20%), n (%)                 | 107 (49.8%)             | 55 (49.5%)            | 52 (50.0%)                  |             |
| High risk (≥ 20%), n (%)                         | 5 (2.3%)                | 2 (1.8%)              | 3 (2.9%)                    |             |
| Cornell LVH                                      |                         |                       |                             |             |

|                                                                                                                                                                                                                                              |     |                  |                  |             |
|----------------------------------------------------------------------------------------------------------------------------------------------------------------------------------------------------------------------------------------------|-----|------------------|------------------|-------------|
| LVH based on Criteria > 2.8mV, n (%)                                                                                                                                                                                                         | 555 | 14 (4.9%)        | 9 (3.3%)         | 0.33        |
| LVH based on Product > 244mVms, n (%)                                                                                                                                                                                                        | 547 | 18 (6.5%)        | 11 (4.1%)        | 0.21        |
| Solokow-Lyon LVH                                                                                                                                                                                                                             |     |                  |                  |             |
| LVH based on Criteria > 3.5mV, n (%)                                                                                                                                                                                                         | 581 | 92 (31.7%)       | 94 (32.3%)       | 0.88        |
| LVH combined, n (%)                                                                                                                                                                                                                          | 582 | 105 (36.1%)      | 104 (35.7%)      | 0.93        |
| CIMT                                                                                                                                                                                                                                         |     |                  |                  |             |
| mean CCA IMT (mm), median (IQR)                                                                                                                                                                                                              | 217 | 0.54 (0.50-0.70) | 0.52 (0.49-0.59) | 0.10        |
| max CCA IMT (mm), median (IQR)                                                                                                                                                                                                               | 217 | 0.62 (0.57-0.70) | 0.60 (0.55-0.66) | 0.12        |
| max bulb IMT (mm), median (IQR)                                                                                                                                                                                                              | 216 | 0.70 (0.60-0.86) | 0.61 (0.51-0.75) | <b>0.01</b> |
| Carotid plaque, n (%)                                                                                                                                                                                                                        | 216 | 5 (4.1%)         | 4 (4.3%)         | 0.93        |
| <i>Abbreviations: P: p-value; IQR: Interquartile range; ASCVD: Arteriosclerotic cardiovascular disease; LVH: Left ventricular hypertrophy; CIMT: Carotid intima-media thickness; CCA: Common carotid artery; IMT: Intima media thickness</i> |     |                  |                  |             |

1

## Appendix

## Appendix 1: Uni- and multivariable analysis

| Linear regression         | Log (FRS)                                                     |          |                                                                 |                  |
|---------------------------|---------------------------------------------------------------|----------|-----------------------------------------------------------------|------------------|
|                           | Univariable<br>Unstandardized $\beta$<br>coefficient (95% CI) | <i>P</i> | Multivariable<br>Unstandardized $\beta$<br>coefficient (95% CI) | <i>P</i>         |
| Day/night shift           | -0.05 (-0.12-0.01)                                            | 0.13     | -0.02 (-0.06-0.02)                                              | 0.18             |
| Age                       | 0.04 (0.04-0.04)                                              | <0.01    | 0.04 (0.03-0.04)                                                | <b>&lt;0.01</b>  |
| Country of origin         |                                                               |          |                                                                 |                  |
| Zimbabwe                  | -0.07 (-0.14--0.00)                                           | 0.04     | -0.01 (-0.07-0.04)                                              | 0.68             |
| South Africa              | Reference                                                     |          |                                                                 |                  |
| Zambia                    | -0.03 (-0.16-0.10)                                            | 0.67     | 0.04 (-0.03-0.15)                                               | 0.28             |
| Other                     | 0.05 (-0.06-0.16)                                             | 0.38     | 0.02 (-0.06-0.08)                                               | 0.48             |
| Education level           |                                                               |          |                                                                 |                  |
| Primary school or less    | 0.13 (0.01-0.25)                                              | 0.04     | -0.09 (-0.10-0.03)                                              | <b>0.01</b>      |
| Secondary school          | Reference                                                     |          |                                                                 |                  |
| Matrix/college/university | -0.02 (-0.09-0.05)                                            | 0.65     | 0.01 (-0.01-0.07)                                               | 0.76             |
| Stable relationship       | 0.31 (0.20-0.41)                                              | <0.01    | 0.10 (-0.004-0.12)                                              | <b>&lt; 0.01</b> |

| Linear regression | Log (ASCVD)                                                   |          |                                                                 |                 |
|-------------------|---------------------------------------------------------------|----------|-----------------------------------------------------------------|-----------------|
|                   | Univariable<br>Unstandardized $\beta$<br>coefficient (95% CI) | <i>P</i> | Multivariable<br>Unstandardized $\beta$<br>coefficient (95% CI) | <i>P</i>        |
| Day/night shift   | -0.03 (-0.08-0.02)                                            | 0.28     | -0.01 (-0.03-0.02)                                              | 0.49            |
| Age               | 0.03 (0.03-0.03)                                              | <0.01    | 0.03 (0.03-0.03)                                                | <b>&lt;0.01</b> |
| Country of origin |                                                               |          |                                                                 |                 |
| Zimbabwe          | -0.65 (-0.12--0.01)                                           | 0.02     | 0.001 (-0.03-0.03)                                              | 0.97            |
| South Africa      | Reference                                                     |          |                                                                 |                 |
| Zambia            | -0.01 (-0.11-0.09)                                            | 0.82     | 0.04 (-0.01-0.09)                                               | 0.13            |



|                     |                           |                    |       |                     |                  |
|---------------------|---------------------------|--------------------|-------|---------------------|------------------|
|                     | Other                     | 0.04 (-0.05-0.12)  | 0.37  | 0.01 (-0.03-0.06)   | 0.58             |
| Education level     |                           |                    |       |                     |                  |
|                     | Primary school or less    | 0.10 (0.01-0.19)   | 0.03  | -0.08 (-0.12--0.03) | <b>&lt; 0.01</b> |
|                     | Secondary school          | Reference          |       |                     |                  |
|                     | Matrix/college/university | -0.02 (-0.08-0.03) | 0.38  | -0.01 (-0.04-0.02)  | 0.55             |
| Stable relationship |                           | 0.22 (0.14-0.30)   | <0.01 | 0.06 (0.02-0.10)    | <b>&lt; 0.01</b> |

| Linear regression   | Log (mean CCA-IMT)                             |                    |                                                |                    |      |
|---------------------|------------------------------------------------|--------------------|------------------------------------------------|--------------------|------|
|                     | Univariable                                    |                    | Multivariable                                  |                    |      |
|                     | Unstandardized $\beta$<br>coefficient (95% CI) | <i>P</i>           | Unstandardized $\beta$<br>coefficient (95% CI) | <i>P</i>           |      |
| Day/night shift     | -0.01 (-0.03-0.003)                            | 0.12               | -0.003 (-0.02-0.02)                            | 0.74               |      |
| Age                 | 0.01 (0.004-0.01)                              | <0.01              | 0.006 (0.005-0.007)                            | <b>&lt;0.01</b>    |      |
| Country of origin   |                                                |                    |                                                |                    |      |
|                     | Zimbabwe                                       | -0.01 (-0.04-0.03) | 0.74                                           |                    |      |
|                     | South Africa                                   | Reference          |                                                |                    |      |
|                     | Zambia                                         | -0.02 (-0.07-0.01) | 0.24                                           |                    |      |
|                     | Other                                          | -0.04 (-0.05-0.04) | 0.83                                           |                    |      |
| Education level     |                                                |                    |                                                |                    |      |
|                     | Primary school or less                         | 0.01 (-0.01-0.04)  | 0.29                                           |                    |      |
|                     | Secondary school                               | Reference          |                                                |                    |      |
|                     | Matrix/college/university                      | -0.01 (-0.03-0.01) | 0.30                                           |                    |      |
| Stable relationship |                                                | 0.04 (0.01-0.06)   | < 0.01                                         | 0.008 (-0.02-0.04) | 0.61 |

| Binomial logistic regression | LVH combined     |                  |                  |          |
|------------------------------|------------------|------------------|------------------|----------|
|                              | Univariable OR   |                  | Multivariable OR |          |
|                              | (95% CI)         | <i>P</i>         | (95% CI)         | <i>P</i> |
| Day/night shift              | 0.99 (0.70-1.38) | 0.93             | 0.94 (0.67-1.33) | 0.73     |
| Age                          | 0.98 (0.96-1.00) | 0.03             | 0.99 (0.97-1.00) | 0.12     |
| Country of origin            |                  |                  |                  |          |
|                              | Zimbabwe         | 1.34 (0.86-2.08) | 0.21             |          |

|                     |                           |                  |       |                                  |
|---------------------|---------------------------|------------------|-------|----------------------------------|
|                     | South Africa              | Reference        |       |                                  |
|                     | Zambia                    | 1.18 (0.55-2.51) | 0.67  |                                  |
|                     | Other                     | 1.15 (0.59-2.24) | 0.68  |                                  |
| Education level     |                           |                  |       |                                  |
|                     | Primary school or less    | 1.36 (0.73-2.52) | 0.33  |                                  |
|                     | Secondary school          | Reference        |       |                                  |
|                     | Matrix/college/university | 1.21 (0.83-1.74) | 0.32  |                                  |
| Stable relationship |                           | 0.37 (0.21-0.64) | <0.01 | 0.40 (0.23-0.70) <b>&lt;0.01</b> |

Appendix 2: Sensitivity analysis, definition night shift worker is working two to three night shift a week

| Linear regression            | Log (FRS)                                                     |                     |                                                                 |                     |                 |
|------------------------------|---------------------------------------------------------------|---------------------|-----------------------------------------------------------------|---------------------|-----------------|
|                              | Univariable<br>Unstandardized $\beta$<br>coefficient (95% CI) | <i>P</i>            | Multivariable<br>Unstandardized $\beta$<br>coefficient (95% CI) | <i>P</i>            |                 |
| Day/night shift (2-3 nights) | -0.03 (-0.10-0.04)                                            | 0.34                | -0.03 (-0.06-0.01)                                              | 0.15                |                 |
| Age                          | 0.04 (0.04-0.04)                                              | <0.01               | 0.04 (0.04-0.04)                                                | <b>&lt;0.01</b>     |                 |
| Country of origin            |                                                               |                     |                                                                 |                     |                 |
|                              | Zimbabwe                                                      | -0.07 (-0.14--0.00) | 0.04                                                            | 0.01 (-0.04-0.05)   | 0.75            |
|                              | South Africa                                                  | Reference           |                                                                 |                     |                 |
|                              | Zambia                                                        | -0.03 (-0.16-0.10)  | 0.67                                                            | 0.04 (-0.04-0.11)   | 0.31            |
|                              | Other                                                         | 0.05 (-0.06-0.16)   | 0.38                                                            | 0.02 (-0.04-0.09)   | 0.51            |
| Education level              |                                                               |                     |                                                                 |                     |                 |
|                              | Primary school or less                                        | 0.13 (0.01-0.25)    | 0.04                                                            | -0.09 (-0.15--0.02) | <b>&lt;0.01</b> |
|                              | Secondary school                                              | Reference           |                                                                 |                     |                 |
|                              | Matrix/college/university                                     | -0.02 (-0.09-0.05)  | 0.65                                                            | 0.01(-0.03-0.04)    | 0.79            |
| Stable relationship          |                                                               | 0.31 (0.20-0.41)    | <0.01                                                           | 0.10 (0.05-0.16)    | <b>&lt;0.01</b> |

|                   |             |
|-------------------|-------------|
| Linear regression | Log (ASCVD) |
|-------------------|-------------|

|                              | Univariable                                    |          | Multivariable                                  |                  |
|------------------------------|------------------------------------------------|----------|------------------------------------------------|------------------|
|                              | Unstandardized $\beta$<br>coefficient (95% CI) | <i>P</i> | Unstandardized $\beta$<br>coefficient (95% CI) | <i>P</i>         |
| Day/night shift (2-3 nights) | -0.01 (-0.07-0.04)                             | 0.63     | -0.01 (-0.03-0.02)                             | 0.48             |
| Age                          | 0.03 (0.03-0.03)                               | <0.01    | 0.03 (0.03-0.03)                               | <b>&lt;0.01</b>  |
| Country of origin            |                                                |          |                                                |                  |
| Zimbabwe                     | -0.65 (-0.12--0.01)                            | 0.02     | 0.00 (-0.03-0.03)                              | 0.99             |
| South Africa                 | Reference                                      |          |                                                |                  |
| Zambia                       | -0.01 (-0.11-0.09)                             | 0.82     | 0.04 (-0.01-0.09)                              | 0.14             |
| Other                        | 0.04 (-0.05-0.12)                              | 0.37     | 0.01 (-0.03-0.06)                              | 0.59             |
| Education level              |                                                |          |                                                |                  |
| Primary school or less       | 0.10 (0.01-0.19)                               | 0.03     | -0.08 (-0.12-0.03)                             | <b>&lt; 0.01</b> |
| Secondary school             | Reference                                      |          |                                                |                  |
| Matrix/college/university    | -0.02 (-0.08-0.03)                             | 0.38     | -0.01 (-0.04-0.02)                             | 0.53             |
| Stable relationship          | 0.22 (0.14-0.30)                               | <0.01    | 0.06 (0.02-0.10)                               | <b>&lt; 0.01</b> |

| Linear regression            | Log (mean CCA-IMT)                                            |          |                                                                 |                 |
|------------------------------|---------------------------------------------------------------|----------|-----------------------------------------------------------------|-----------------|
|                              | Univariable<br>Unstandardized $\beta$<br>coefficient (95% CI) | <i>P</i> | Multivariable<br>Unstandardized $\beta$<br>coefficient (95% CI) | <i>P</i>        |
| Day/night shift (2-3 nights) | -0.03 (-0.09-0.03)                                            | 0.36     | -0.004 (-0.04-0.03)                                             | 0.82            |
| Age                          | 0.01 (0.004-0.01)                                             | <0.01    | 0.03 (0.03-0.03)                                                | <b>&lt;0.01</b> |
| Country of origin            |                                                               |          |                                                                 |                 |
| Zimbabwe                     | -0.01 (-0.04-0.03)                                            | 0.74     |                                                                 |                 |
| South Africa                 | Reference                                                     |          |                                                                 |                 |
| Zambia                       | -0.02 (-0.07-0.01)                                            | 0.24     |                                                                 |                 |
| Other                        | -0.04 (-0.05-0.04)                                            | 0.83     |                                                                 |                 |
| Education level              |                                                               |          |                                                                 |                 |
| Primary school or less       | 0.01 (-0.01-0.04)                                             | 0.29     |                                                                 |                 |
| Secondary school             | Reference                                                     |          |                                                                 |                 |
| Matrix/college/university    | -0.01 (-0.03-0.01)                                            | 0.30     |                                                                 |                 |

|                     |                  |        |                   |      |
|---------------------|------------------|--------|-------------------|------|
| Stable relationship | 0.04 (0.01-0.06) | < 0.01 | 0.05 (-0.01-0.10) | 0.09 |
|---------------------|------------------|--------|-------------------|------|

| Binomial logistic regression | LVH combined               |          |                              |                 |
|------------------------------|----------------------------|----------|------------------------------|-----------------|
|                              | Univariable OR<br>(95% CI) | <i>P</i> | Multivariable OR<br>(95% CI) | <i>P</i>        |
| Day/night shift (2-3 nights) | 0.99 (0.68-1.45)           | 0.91     | 0.92 (0.69-1.42)             | 0.79            |
| Age                          | 0.98 (0.96-1.00)           | 0.03     | 0.98 (0.97-1.00)             | 0.11            |
| Country of origin            |                            |          |                              |                 |
| Zimbabwe                     | 1.34 (0.86-2.08)           | 0.21     |                              |                 |
| South Africa                 | Reference                  |          |                              |                 |
| Zambia                       | 1.18 (0.55-2.51)           | 0.67     |                              |                 |
| Other                        | 1.15 (0.59-2.24)           | 0.68     |                              |                 |
| Education level              |                            |          |                              |                 |
| Primary school or less       | 1.36 (0.73-2.52)           | 0.33     |                              |                 |
| Secondary school             | Reference                  |          |                              |                 |
| Matrix/college/university    | 1.21 (0.83-1.74)           | 0.32     |                              |                 |
| Stable relationship          | 0.37 (0.21-0.64)           | <0.01    | 0.45 (0.25-0.78)             | <b>&lt;0.01</b> |

### Appendix 3: Sensitivity analysis, definition night shift worker is working four or more night shift a week

| Linear regression                  | Log (FRS)                                                     |          |                                                                 |                 |
|------------------------------------|---------------------------------------------------------------|----------|-----------------------------------------------------------------|-----------------|
|                                    | Univariable<br>Unstandardized $\beta$<br>coefficient (95% CI) | <i>P</i> | Multivariable<br>Unstandardized $\beta$<br>coefficient (95% CI) | <i>P</i>        |
| Day/night shift (4 or more nights) | -0.05 (-0.15-0.05)                                            | 0.37     | 0.002 (-0.05-0.05)                                              | 0.93            |
| Age                                | 0.04 (0.04-0.04)                                              | <0.01    | 0.04 (0.04-0.04)                                                | <b>&lt;0.01</b> |
| Country of origin                  |                                                               |          |                                                                 |                 |
| Zimbabwe                           | -0.07 (-0.14--0.00)                                           | 0.04     | 0.01 (-0.04-0.06)                                               | 0.70            |
| South Africa                       | Reference                                                     |          |                                                                 |                 |

|                     |                           |                    |       |                     |                 |
|---------------------|---------------------------|--------------------|-------|---------------------|-----------------|
|                     | Zambia                    | -0.03 (-0.16-0.10) | 0.67  | 0.04 (-0.03-0.12)   | 0.28            |
|                     | Other                     | 0.05 (-0.06-0.16)  | 0.38  | 0.02 (-0.04-0.09)   | 0.47            |
| Education level     |                           |                    |       |                     |                 |
|                     | Primary school or less    | 0.13 (0.01-0.25)   | 0.04  | -0.09 (-0.15--0.02) | <b>&lt;0.01</b> |
|                     | Secondary school          | Reference          |       |                     |                 |
|                     | Matrix/college/university | -0.02 (-0.09-0.05) | 0.65  | 0.01 (-0.03-0.04)   | 0.73            |
| Stable relationship |                           |                    |       |                     |                 |
|                     |                           | 0.31 (0.20-0.41)   | <0.01 | 0.10 (0.05-0.16)    | <b>&lt;0.01</b> |

|                                    |                           | Log (ASCVD)                                    |          |                                                |                  |
|------------------------------------|---------------------------|------------------------------------------------|----------|------------------------------------------------|------------------|
| Linear regression                  |                           | Univariable                                    | <i>P</i> | Multivariable                                  | <i>P</i>         |
|                                    |                           | Unstandardized $\beta$<br>coefficient (95% CI) |          | Unstandardized $\beta$<br>coefficient (95% CI) |                  |
| Day/night shift (4 or more nights) |                           | -0.04 (-0.11-0.04)                             | 0.35     | 0.00 (-0.04-0.04)                              | 0.99             |
| Age                                |                           | 0.03 (0.03-0.03)                               | <0.01    | 0.03 (0.03-0.03)                               | <b>&lt;0.01</b>  |
| Country of origin                  |                           |                                                |          |                                                |                  |
|                                    | Zimbabwe                  | -0.65 (-0.12--0.01)                            | 0.02     | 0.00 (-0.03-0.03)                              | 0.98             |
|                                    | South Africa              | Reference                                      |          |                                                |                  |
|                                    | Zambia                    | -0.01 (-0.11-0.09)                             | 0.82     | 0.04 (-0.01-0.09)                              | 0.13             |
|                                    | Other                     | 0.04 (-0.05-0.12)                              | 0.37     | 0.01 (-0.03-0.06)                              | 0.57             |
| Education level                    |                           |                                                |          |                                                |                  |
|                                    | Primary school or less    | 0.10 (0.01-0.19)                               | 0.03     | -0.07 (-0.12--0.03)                            | <b>&lt; 0.01</b> |
|                                    | Secondary school          | Reference                                      |          |                                                |                  |
|                                    | Matrix/college/university | -0.02 (-0.08-0.03)                             | 0.38     | -0.01 (-0.03-0.02)                             | 0.56             |
| Stable relationship                |                           | 0.22 (0.14-0.30)                               | <0.01    | 0.06 (0.02-0.10)                               | <b>&lt; 0.01</b> |

|                   |  | Log (mean CCA-IMT)                             |          |                                                |          |
|-------------------|--|------------------------------------------------|----------|------------------------------------------------|----------|
| Linear regression |  | Univariable                                    | <i>P</i> | Multivariable                                  | <i>P</i> |
|                   |  | Unstandardized $\beta$<br>coefficient (95% CI) |          | Unstandardized $\beta$<br>coefficient (95% CI) |          |

|                                    |                    |        |                    |                 |
|------------------------------------|--------------------|--------|--------------------|-----------------|
| Day/night shift (4 or more nights) | -0.05 (-0.14-0.03) | 0.21   | -0.02 (-0.07-0.03) | 0.39            |
| Age                                | 0.01 (0.004-0.01)  | <0.01  | 0.03 (0.03-0.03)   | <b>&lt;0.01</b> |
| Country of origin                  |                    |        |                    |                 |
| Zimbabwe                           | -0.01 (-0.04-0.03) | 0.74   |                    |                 |
| South Africa                       | Reference          |        |                    |                 |
| Zambia                             | -0.02 (-0.07-0.01) | 0.24   |                    |                 |
| Other                              | -0.04 (-0.05-0.04) | 0.83   |                    |                 |
| Education level                    |                    |        |                    |                 |
| Primary school or less             | 0.01 (-0.01-0.04)  | 0.29   |                    |                 |
| Secondary school                   | Reference          |        |                    |                 |
| Matrix/college/university          | -0.01 (-0.03-0.01) | 0.30   |                    |                 |
| Stable relationship                | 0.04 (0.01-0.06)   | < 0.01 | 0.05 (-0.01-0.10)  | 0.10            |

| Binomial logistic regression       | LVH combined               |          |                              |                 |
|------------------------------------|----------------------------|----------|------------------------------|-----------------|
|                                    | Univariable OR<br>(95% CI) | <i>P</i> | Multivariable OR<br>(95% CI) | <i>P</i>        |
| Day/night shift (4 or more nights) | 0.99 (0.81-1.18)           | 0.95     | 0.93 (0.73-1.28)             | 0.79            |
| Age                                | 0.98 (0.96-1.00)           | 0.03     | 0.99 (0.98-1.00)             | 0.10            |
| Country of origin                  |                            |          |                              |                 |
| Zimbabwe                           | 1.34 (0.86-2.08)           | 0.21     |                              |                 |
| South Africa                       | Reference                  |          |                              |                 |
| Zambia                             | 1.18 (0.55-2.51)           | 0.67     |                              |                 |
| Other                              | 1.15 (0.59-2.24)           | 0.68     |                              |                 |
| Education level                    |                            |          |                              |                 |
| Primary school or less             | 1.36 (0.73-2.52)           | 0.33     |                              |                 |
| Secondary school                   | Reference                  |          |                              |                 |
| Matrix/college/university          | 1.21 (0.83-1.74)           | 0.32     |                              |                 |
| Stable relationship                | 0.37 (0.21-0.64)           | <0.01    | 0.41 (0.28-0.65)             | <b>&lt;0.01</b> |

#### Appendix 4: Sensitivity analysis including only truck drivers working more than 10 years as a truck driver

| Linear regression         | Log (FRS)                                                     |          |                                                                 |                 |
|---------------------------|---------------------------------------------------------------|----------|-----------------------------------------------------------------|-----------------|
|                           | Univariable<br>Unstandardized $\beta$<br>coefficient (95% CI) | <i>P</i> | Multivariable<br>Unstandardized $\beta$<br>coefficient (95% CI) | <i>P</i>        |
| Day/night shift           | 0.12 (-0.08-0.33)                                             | 0.24     | 0.06 (-0.06-0.19)                                               | 0.32            |
| Age                       | 0.08 (0.07- 0.09)                                             | <0.01    | 0.08 (0.07-0.08)                                                | <b>&lt;0.01</b> |
| Country of origin         |                                                               |          |                                                                 |                 |
| Zimbabwe                  | -0.42 (-0.69--0.16)                                           | 0.36     |                                                                 |                 |
| South Africa              | Reference                                                     |          |                                                                 |                 |
| Zambia                    | -0.12 (-0.54-0.31)                                            | 0.59     |                                                                 |                 |
| Other                     | 0.15 (-0.51-0.21)                                             | 0.41     |                                                                 |                 |
| Education level           |                                                               |          |                                                                 |                 |
| Primary school or less    | 0.17 (-0.14-0.47)                                             | 0.28     |                                                                 |                 |
| Secondary school          | Reference                                                     |          |                                                                 |                 |
| Matrix/college/university | 0.18 (-0.05-0.42)                                             | 0.24     |                                                                 |                 |
| Stable relationship       | 0.59 (0.16-0.1.02)                                            | 0.07     | 0.27 (0.01-0.54)                                                | <b>0.04</b>     |

| Linear regression | Log (ASCVD)                                                   |          |                                                                 |                  |
|-------------------|---------------------------------------------------------------|----------|-----------------------------------------------------------------|------------------|
|                   | Univariable<br>Unstandardized $\beta$<br>coefficient (95% CI) | <i>P</i> | Multivariable<br>Unstandardized $\beta$<br>coefficient (95% CI) | <i>P</i>         |
| Day/night shift   | 0.04 (-0.03-0.11)                                             | 0.27     | 0.02 (-0.02-0.06)                                               | 0.38             |
| Age               | 0.03 (0.03-0.03)                                              | <0.01    | 0.03 (0.02-0.03)                                                | <b>&lt; 0.01</b> |
| Country of origin |                                                               |          |                                                                 |                  |
| Zimbabwe          | -0.03 (-0.12--0.01)                                           | 0.26     |                                                                 |                  |
| South Africa      | Reference                                                     |          |                                                                 |                  |
| Zambia            | -0.01 (-0.15-0.12)                                            | 0.75     |                                                                 |                  |
| Other             | 0.03 (-0.04-0.14)                                             | 0.37     |                                                                 |                  |

|                           |                    |       |                   |      |
|---------------------------|--------------------|-------|-------------------|------|
| Education level           |                    |       |                   |      |
| Primary school or less    | 0.08 (0.01-0.11)   | 0.56  |                   |      |
| Secondary school          | Reference          |       |                   |      |
| Matrix/college/university | -0.03 (-0.07-0.04) | 0.34  |                   |      |
| Stable relationship       | 0.28 (0.19-0.33)   | <0.01 | 0.07 (-0.01-0.15) | 0.08 |

| Linear regression         | Log (mean CCA-IMT)                             |          |                                                |                 |
|---------------------------|------------------------------------------------|----------|------------------------------------------------|-----------------|
|                           | Univariable                                    |          | Multivariable                                  |                 |
|                           | Unstandardized $\beta$<br>coefficient (95% CI) | <i>P</i> | Unstandardized $\beta$<br>coefficient (95% CI) | <i>P</i>        |
| Day/night shift           | -0.01 (-0.01-0.003)                            | 0.15     | -0.03 (-0.08-0.001)                            | 0.05            |
| Age                       | 0.01 (0.005-0.01)                              | <0.01    | 0.008 (0.005-0.01)                             | <b>&lt;0.01</b> |
| Country of origin         |                                                |          |                                                |                 |
| Zimbabwe                  | -0.02 (-0.05-0.04)                             | 0.72     |                                                |                 |
| South Africa              | Reference                                      |          |                                                |                 |
| Zambia                    | -0.03 (-0.08-0.02)                             | 0.35     |                                                |                 |
| Other                     | -0.05 (-0.06-0.05)                             | 0.77     |                                                |                 |
| Education level           |                                                |          |                                                |                 |
| Primary school or less    | 0.01 (-0.01-0.05)                              | 0.28     |                                                |                 |
| Secondary school          | Reference                                      |          |                                                |                 |
| Matrix/college/university | -0.01 (-0.04-0.01)                             | 0.38     |                                                |                 |
| Stable relationship       | 0.04 (0.01-0.05)                               | < 0.01   | 0.018 (-0.1-0.13)                              | 0.75            |

| Binomial logistic regression | LVH combined     |          |                  |          |
|------------------------------|------------------|----------|------------------|----------|
|                              | Univariable OR   |          | Multivariable OR |          |
|                              | (95% CI)         | <i>P</i> | (95% CI)         | <i>P</i> |
| Day/night shift              | 0.98 (0.73-1.45) | 0.91     | 0.92 (0.65-1.31) | 0.78     |
| Age                          | 0.99 (0.97-1.00) | 0.04     | 0.99 (0.96-1.00) | 0.08     |
| Country of origin            |                  |          |                  |          |
| Zimbabwe                     | 1.62 (0.96-2.25) | 0.25     |                  |          |
| South Africa                 | Reference        |          |                  |          |



|                     |                           |                  |       |                                  |
|---------------------|---------------------------|------------------|-------|----------------------------------|
|                     | Zambia                    | 1.21 (0.53-2.66) | 0.75  |                                  |
|                     | Other                     | 1.12 (0.54-2.22) | 0.58  |                                  |
| Education level     |                           |                  |       |                                  |
|                     | Primary school or less    | 1.36 (0.73-2.52) | 0.33  |                                  |
|                     | Secondary school          | Reference        |       |                                  |
|                     | Matrix/college/university | 1.21 (0.83-1.74) | 0.32  |                                  |
| Stable relationship |                           | 0.34 (0.23-0.69) | <0.01 | 0.51 (0.33-0.84) <b>&lt;0.01</b> |

For peer review only

# Reporting checklist for cross sectional study.

Based on the STROBE cross sectional guidelines.

## Instructions to authors

Complete this checklist by entering the page numbers from your manuscript where readers will find each of the items listed below.

Your article may not currently address all the items on the checklist. Please modify your text to include the missing information. If you are certain that an item does not apply, please write "n/a" and provide a short explanation.

Upload your completed checklist as an extra file when you submit to a journal.

|                           |                                                                                                                     |  | Page   |
|---------------------------|---------------------------------------------------------------------------------------------------------------------|--|--------|
|                           | Reporting Item                                                                                                      |  | Number |
| <b>Title and abstract</b> |                                                                                                                     |  |        |
| Title                     | <a href="#">#1a</a> Indicate the study's design with a commonly used term in the title or the abstract              |  | 1      |
| Abstract                  | <a href="#">#1b</a> Provide in the abstract an informative and balanced summary of what was done and what was found |  | 3      |
| <b>Introduction</b>       |                                                                                                                     |  |        |
| Background / rationale    | <a href="#">#2</a> Explain the scientific background and rationale for the investigation being reported             |  | 5      |

|    |                      |                     |                                                                                                                                                                                                                                                                      |     |
|----|----------------------|---------------------|----------------------------------------------------------------------------------------------------------------------------------------------------------------------------------------------------------------------------------------------------------------------|-----|
| 1  | Objectives           | <a href="#">#3</a>  | State specific objectives, including any prespecified hypotheses                                                                                                                                                                                                     | 5   |
| 2  |                      |                     |                                                                                                                                                                                                                                                                      |     |
| 3  |                      |                     |                                                                                                                                                                                                                                                                      |     |
| 4  |                      |                     |                                                                                                                                                                                                                                                                      |     |
| 5  |                      |                     |                                                                                                                                                                                                                                                                      |     |
| 6  | <b>Methods</b>       |                     |                                                                                                                                                                                                                                                                      |     |
| 7  |                      |                     |                                                                                                                                                                                                                                                                      |     |
| 8  |                      |                     |                                                                                                                                                                                                                                                                      |     |
| 9  |                      |                     |                                                                                                                                                                                                                                                                      |     |
| 10 | Study design         | <a href="#">#4</a>  | Present key elements of study design early in the paper                                                                                                                                                                                                              | 6   |
| 11 |                      |                     |                                                                                                                                                                                                                                                                      |     |
| 12 |                      |                     |                                                                                                                                                                                                                                                                      |     |
| 13 | Setting              | <a href="#">#5</a>  | Describe the setting, locations, and relevant dates, including periods of recruitment, exposure, follow-up, and data collection                                                                                                                                      | 6   |
| 14 |                      |                     |                                                                                                                                                                                                                                                                      |     |
| 15 |                      |                     |                                                                                                                                                                                                                                                                      |     |
| 16 |                      |                     |                                                                                                                                                                                                                                                                      |     |
| 17 |                      |                     |                                                                                                                                                                                                                                                                      |     |
| 18 |                      |                     |                                                                                                                                                                                                                                                                      |     |
| 19 |                      |                     |                                                                                                                                                                                                                                                                      |     |
| 20 | Eligibility criteria | <a href="#">#6a</a> | Give the eligibility criteria, and the sources and methods of selection of participants.                                                                                                                                                                             | 6   |
| 21 |                      |                     |                                                                                                                                                                                                                                                                      |     |
| 22 |                      |                     |                                                                                                                                                                                                                                                                      |     |
| 23 |                      |                     |                                                                                                                                                                                                                                                                      |     |
| 24 |                      |                     |                                                                                                                                                                                                                                                                      |     |
| 25 |                      |                     |                                                                                                                                                                                                                                                                      |     |
| 26 |                      | <a href="#">#7</a>  | Clearly define all outcomes, exposures, predictors, potential confounders, and effect modifiers. Give diagnostic criteria, if applicable                                                                                                                             | 7   |
| 27 |                      |                     |                                                                                                                                                                                                                                                                      |     |
| 28 |                      |                     |                                                                                                                                                                                                                                                                      |     |
| 29 |                      |                     |                                                                                                                                                                                                                                                                      |     |
| 30 |                      |                     |                                                                                                                                                                                                                                                                      |     |
| 31 |                      |                     |                                                                                                                                                                                                                                                                      |     |
| 32 |                      |                     |                                                                                                                                                                                                                                                                      |     |
| 33 | Data sources /       | <a href="#">#8</a>  | For each variable of interest give sources of data and details of methods of assessment (measurement). Describe comparability of assessment methods if there is more than one group. Give information separately for for exposed and unexposed groups if applicable. | 7   |
| 34 | measurement          |                     |                                                                                                                                                                                                                                                                      |     |
| 35 |                      |                     |                                                                                                                                                                                                                                                                      |     |
| 36 |                      |                     |                                                                                                                                                                                                                                                                      |     |
| 37 |                      |                     |                                                                                                                                                                                                                                                                      |     |
| 38 |                      |                     |                                                                                                                                                                                                                                                                      |     |
| 39 |                      |                     |                                                                                                                                                                                                                                                                      |     |
| 40 |                      |                     |                                                                                                                                                                                                                                                                      |     |
| 41 |                      |                     |                                                                                                                                                                                                                                                                      |     |
| 42 |                      |                     |                                                                                                                                                                                                                                                                      |     |
| 43 |                      |                     |                                                                                                                                                                                                                                                                      |     |
| 44 |                      |                     |                                                                                                                                                                                                                                                                      |     |
| 45 | Bias                 | <a href="#">#9</a>  | Describe any efforts to address potential sources of bias                                                                                                                                                                                                            | 8   |
| 46 |                      |                     |                                                                                                                                                                                                                                                                      |     |
| 47 |                      |                     |                                                                                                                                                                                                                                                                      |     |
| 48 |                      |                     |                                                                                                                                                                                                                                                                      |     |
| 49 | Study size           | <a href="#">#10</a> | Explain how the study size was arrived at                                                                                                                                                                                                                            | 6   |
| 50 |                      |                     |                                                                                                                                                                                                                                                                      |     |
| 51 |                      |                     |                                                                                                                                                                                                                                                                      |     |
| 52 | Quantitative         | <a href="#">#11</a> | Explain how quantitative variables were handled in the analyses. If applicable, describe which groupings were chosen, and why                                                                                                                                        | 8/9 |
| 53 | variables            |                     |                                                                                                                                                                                                                                                                      |     |
| 54 |                      |                     |                                                                                                                                                                                                                                                                      |     |
| 55 |                      |                     |                                                                                                                                                                                                                                                                      |     |
| 56 |                      |                     |                                                                                                                                                                                                                                                                      |     |
| 57 |                      |                     |                                                                                                                                                                                                                                                                      |     |
| 58 |                      |                     |                                                                                                                                                                                                                                                                      |     |
| 59 |                      |                     |                                                                                                                                                                                                                                                                      |     |
| 60 |                      |                     |                                                                                                                                                                                                                                                                      |     |

|    |                  |                      |                                                               |     |
|----|------------------|----------------------|---------------------------------------------------------------|-----|
| 1  | Statistical      | <a href="#">#12a</a> | Describe all statistical methods, including those used to     | 9   |
| 2  |                  |                      |                                                               |     |
| 3  | methods          |                      | control for confounding                                       |     |
| 4  |                  |                      |                                                               |     |
| 5  |                  |                      |                                                               |     |
| 6  | Statistical      | <a href="#">#12b</a> | Describe any methods used to examine subgroups and            | 8/9 |
| 7  |                  |                      |                                                               |     |
| 8  | methods          |                      | interactions                                                  |     |
| 9  |                  |                      |                                                               |     |
| 10 |                  |                      |                                                               |     |
| 11 |                  |                      |                                                               |     |
| 12 | Statistical      | <a href="#">#12c</a> | Explain how missing data were addressed                       | 8   |
| 13 |                  |                      |                                                               |     |
| 14 | methods          |                      |                                                               |     |
| 15 |                  |                      |                                                               |     |
| 16 |                  |                      |                                                               |     |
| 17 | Statistical      | <a href="#">#12d</a> | If applicable, describe analytical methods taking account of  | -   |
| 18 |                  |                      |                                                               |     |
| 19 | methods          |                      | sampling strategy                                             |     |
| 20 |                  |                      |                                                               |     |
| 21 |                  |                      |                                                               |     |
| 22 |                  |                      |                                                               |     |
| 23 | Statistical      | <a href="#">#12e</a> | Describe any sensitivity analyses                             | 9   |
| 24 |                  |                      |                                                               |     |
| 25 | methods          |                      |                                                               |     |
| 26 |                  |                      |                                                               |     |
| 27 |                  |                      |                                                               |     |
| 28 | <b>Results</b>   |                      |                                                               |     |
| 29 |                  |                      |                                                               |     |
| 30 |                  |                      |                                                               |     |
| 31 | Participants     | <a href="#">#13a</a> | Report numbers of individuals at each stage of study—eg       | 9   |
| 32 |                  |                      |                                                               |     |
| 33 |                  |                      | numbers potentially eligible, examined for eligibility,       |     |
| 34 |                  |                      |                                                               |     |
| 35 |                  |                      | confirmed eligible, included in the study, completing follow- |     |
| 36 |                  |                      |                                                               |     |
| 37 |                  |                      | up, and analysed. Give information separately for for         |     |
| 38 |                  |                      |                                                               |     |
| 39 |                  |                      | exposed and unexposed groups if applicable.                   |     |
| 40 |                  |                      |                                                               |     |
| 41 |                  |                      |                                                               |     |
| 42 |                  |                      |                                                               |     |
| 43 | Participants     | <a href="#">#13b</a> | Give reasons for non-participation at each stage              | 10  |
| 44 |                  |                      |                                                               |     |
| 45 |                  |                      |                                                               |     |
| 46 | Participants     | <a href="#">#13c</a> | Consider use of a flow diagram                                | -   |
| 47 |                  |                      |                                                               |     |
| 48 |                  |                      |                                                               |     |
| 49 | Descriptive data | <a href="#">#14a</a> | Give characteristics of study participants (eg demographic,   | 11  |
| 50 |                  |                      |                                                               |     |
| 51 |                  |                      | clinical, social) and information on exposures and potential  |     |
| 52 |                  |                      |                                                               |     |
| 53 |                  |                      | confounders. Give information separately for exposed and      |     |
| 54 |                  |                      |                                                               |     |
| 55 |                  |                      | unexposed groups if applicable.                               |     |
| 56 |                  |                      |                                                               |     |
| 57 |                  |                      |                                                               |     |
| 58 |                  |                      |                                                               |     |
| 59 |                  |                      |                                                               |     |
| 60 |                  |                      |                                                               |     |

|    |                   |                      |                                                                   |          |
|----|-------------------|----------------------|-------------------------------------------------------------------|----------|
| 1  | Descriptive data  | <a href="#">#14b</a> | Indicate number of participants with missing data for each        | 11       |
| 2  |                   |                      | variable of interest                                              |          |
| 3  |                   |                      |                                                                   |          |
| 4  |                   |                      |                                                                   |          |
| 5  |                   |                      |                                                                   |          |
| 6  | Outcome data      | <a href="#">#15</a>  | Report numbers of outcome events or summary measures.             | 11/12    |
| 7  |                   |                      | Give information separately for exposed and unexposed             |          |
| 8  |                   |                      | groups if applicable.                                             |          |
| 9  |                   |                      |                                                                   |          |
| 10 |                   |                      |                                                                   |          |
| 11 |                   |                      |                                                                   |          |
| 12 |                   |                      |                                                                   |          |
| 13 |                   |                      |                                                                   |          |
| 14 | Main results      | <a href="#">#16a</a> | Give unadjusted estimates and, if applicable, confounder-         | 11/12    |
| 15 |                   |                      | adjusted estimates and their precision (eg, 95% confidence        |          |
| 16 |                   |                      | interval). Make clear which confounders were adjusted for         |          |
| 17 |                   |                      | and why they were included                                        |          |
| 18 |                   |                      |                                                                   |          |
| 19 |                   |                      |                                                                   |          |
| 20 |                   |                      |                                                                   |          |
| 21 |                   |                      |                                                                   |          |
| 22 |                   |                      |                                                                   |          |
| 23 |                   |                      |                                                                   |          |
| 24 | Main results      | <a href="#">#16b</a> | Report category boundaries when continuous variables were         | 10/11/12 |
| 25 |                   |                      | categorized                                                       |          |
| 26 |                   |                      |                                                                   |          |
| 27 |                   |                      |                                                                   |          |
| 28 |                   |                      |                                                                   |          |
| 29 | Main results      | <a href="#">#16c</a> | If relevant, consider translating estimates of relative risk into | -        |
| 30 |                   |                      | absolute risk for a meaningful time period                        |          |
| 31 |                   |                      |                                                                   |          |
| 32 |                   |                      |                                                                   |          |
| 33 |                   |                      |                                                                   |          |
| 34 |                   |                      |                                                                   |          |
| 35 | Other analyses    | <a href="#">#17</a>  | Report other analyses done—e.g., analyses of subgroups            | 13       |
| 36 |                   |                      | and interactions, and sensitivity analyses                        |          |
| 37 |                   |                      |                                                                   |          |
| 38 |                   |                      |                                                                   |          |
| 39 |                   |                      |                                                                   |          |
| 40 | <b>Discussion</b> |                      |                                                                   |          |
| 41 |                   |                      |                                                                   |          |
| 42 |                   |                      |                                                                   |          |
| 43 | Key results       | <a href="#">#18</a>  | Summarise key results with reference to study objectives          | 13       |
| 44 |                   |                      |                                                                   |          |
| 45 |                   |                      |                                                                   |          |
| 46 | Limitations       | <a href="#">#19</a>  | Discuss limitations of the study, taking into account sources     | 14       |
| 47 |                   |                      | of potential bias or imprecision. Discuss both direction and      |          |
| 48 |                   |                      | magnitude of any potential bias.                                  |          |
| 49 |                   |                      |                                                                   |          |
| 50 |                   |                      |                                                                   |          |
| 51 |                   |                      |                                                                   |          |
| 52 |                   |                      |                                                                   |          |
| 53 |                   |                      |                                                                   |          |
| 54 |                   |                      |                                                                   |          |
| 55 |                   |                      |                                                                   |          |
| 56 |                   |                      |                                                                   |          |
| 57 |                   |                      |                                                                   |          |
| 58 |                   |                      |                                                                   |          |
| 59 |                   |                      |                                                                   |          |
| 60 |                   |                      |                                                                   |          |

1 Interpretation [#20](#) Give a cautious overall interpretation considering objectives, 13/14  
2  
3 limitations, multiplicity of analyses, results from similar  
4  
5 studies, and other relevant evidence.  
6  
7

8  
9 Generalisability [#21](#) Discuss the generalisability (external validity) of the study 14  
10  
11 results  
12  
13

## 14 Other Information

15

16  
17 Funding [#22](#) Give the source of funding and the role of the funders for the 15  
18  
19 present study and, if applicable, for the original study on  
20  
21 which the present article is based  
22  
23

24  
25 None The STROBE checklist is distributed under the terms of the Creative Commons Attribution  
26  
27 License CC-BY. This checklist can be completed online using <https://www.goodreports.org/>, a tool  
28  
29 made by the [EQUATOR Network](#) in collaboration with [Penelope.ai](#)  
30  
31

# BMJ Open

## The influence of shift work on cardiovascular disease risk in Southern African long-distance truck drivers: A cross-sectional study

|                                 |                                                                                                                                                                                                                                                                                                                                                                                                                                                                                                                                                                                                                                                                                                                                                                                                                                                                                                                                                                                                                                                                                    |
|---------------------------------|------------------------------------------------------------------------------------------------------------------------------------------------------------------------------------------------------------------------------------------------------------------------------------------------------------------------------------------------------------------------------------------------------------------------------------------------------------------------------------------------------------------------------------------------------------------------------------------------------------------------------------------------------------------------------------------------------------------------------------------------------------------------------------------------------------------------------------------------------------------------------------------------------------------------------------------------------------------------------------------------------------------------------------------------------------------------------------|
| Journal:                        | <i>BMJ Open</i>                                                                                                                                                                                                                                                                                                                                                                                                                                                                                                                                                                                                                                                                                                                                                                                                                                                                                                                                                                                                                                                                    |
| Manuscript ID                   | bmjopen-2021-050645.R2                                                                                                                                                                                                                                                                                                                                                                                                                                                                                                                                                                                                                                                                                                                                                                                                                                                                                                                                                                                                                                                             |
| Article Type:                   | Original research                                                                                                                                                                                                                                                                                                                                                                                                                                                                                                                                                                                                                                                                                                                                                                                                                                                                                                                                                                                                                                                                  |
| Date Submitted by the Author:   | 04-Jan-2022                                                                                                                                                                                                                                                                                                                                                                                                                                                                                                                                                                                                                                                                                                                                                                                                                                                                                                                                                                                                                                                                        |
| Complete List of Authors:       | <p>Draaijer, Melvin; Amsterdam UMC Locatie VUmc, Department of Global Health</p> <p>Scheuermaier, Karine; University of the Witwatersrand Faculty of Health Sciences, Wits Sleep Laboratory, Brain Function Research Group, School of Physiology</p> <p>Lalla-Edward, Samanta Tresha; University of the Witwatersrand Faculty of Health Sciences, Ezintsha, a sub-division of Wits Reproductive Health and HIV Institute</p> <p>Fischer, Alex; University of the Witwatersrand Faculty of Health Sciences, Ezintsha, a sub-division of Wits Reproductive Health and HIV Institute</p> <p>Grobbee, Diederick; Julius Center for Health Sciences and Primary Care, Global Health Unit</p> <p>Venter, Francois; University of the Witwatersrand Faculty of Health Sciences, Ezintsha, a sub-division of Wits Reproductive Health and HIV Institute</p> <p>Vos, Alinda; Julius Center for Health Sciences and Primary Care, Global Health Unit; University of the Witwatersrand Faculty of Health Sciences, Ezintsha, a sub-division of Wits Reproductive Health and HIV Institute</p> |
| <b>Primary Subject Heading</b>: | Global health                                                                                                                                                                                                                                                                                                                                                                                                                                                                                                                                                                                                                                                                                                                                                                                                                                                                                                                                                                                                                                                                      |
| Secondary Subject Heading:      | Epidemiology, Occupational and environmental medicine                                                                                                                                                                                                                                                                                                                                                                                                                                                                                                                                                                                                                                                                                                                                                                                                                                                                                                                                                                                                                              |
| Keywords:                       | Coronary heart disease < CARDIOLOGY, Risk management < HEALTH SERVICES ADMINISTRATION & MANAGEMENT, OCCUPATIONAL & INDUSTRIAL MEDICINE, PUBLIC HEALTH                                                                                                                                                                                                                                                                                                                                                                                                                                                                                                                                                                                                                                                                                                                                                                                                                                                                                                                              |
|                                 |                                                                                                                                                                                                                                                                                                                                                                                                                                                                                                                                                                                                                                                                                                                                                                                                                                                                                                                                                                                                                                                                                    |

SCHOLARONE™  
Manuscripts



I, the Submitting Author has the right to grant and does grant on behalf of all authors of the Work (as defined in the below author licence), an exclusive licence and/or a non-exclusive licence for contributions from authors who are: i) UK Crown employees; ii) where BMJ has agreed a CC-BY licence shall apply, and/or iii) in accordance with the terms applicable for US Federal Government officers or employees acting as part of their official duties; on a worldwide, perpetual, irrevocable, royalty-free basis to BMJ Publishing Group Ltd ("BMJ") its licensees and where the relevant Journal is co-owned by BMJ to the co-owners of the Journal, to publish the Work in this journal and any other BMJ products and to exploit all rights, as set out in our [licence](#).

The Submitting Author accepts and understands that any supply made under these terms is made by BMJ to the Submitting Author unless you are acting as an employee on behalf of your employer or a postgraduate student of an affiliated institution which is paying any applicable article publishing charge ("APC") for Open Access articles. Where the Submitting Author wishes to make the Work available on an Open Access basis (and intends to pay the relevant APC), the terms of reuse of such Open Access shall be governed by a Creative Commons licence – details of these licences and which [Creative Commons](#) licence will apply to this Work are set out in our licence referred to above.

Other than as permitted in any relevant BMJ Author's Self Archiving Policies, I confirm this Work has not been accepted for publication elsewhere, is not being considered for publication elsewhere and does not duplicate material already published. I confirm all authors consent to publication of this Work and authorise the granting of this licence.



1  
2  
3  
4  
5  
6  
7  
8  
9  
10  
11  
12  
13  
14  
15  
16  
17  
18  
19  
20  
21  
22  
23  
24  
25  
26  
27  
28  
29  
30  
31  
32  
33  
34  
35  
36  
37  
38  
39  
40  
41  
42  
43  
44  
45  
46  
47  
48  
49  
50  
51  
52  
53  
54  
55  
56  
57  
58  
59  
60

1 **The influence of shift work on cardiovascular disease risk in**  
2 **Southern African long-distance truck drivers: A cross-sectional**  
3 **study**

4 M. Draaijer<sup>1</sup>, MD, K. Scheuermeier<sup>2</sup>, MD, MMSc, S.T. Lalla-Edward<sup>3</sup>, PhD, A Fischer<sup>3</sup>,  
5 MPH, D.E. Grobbee<sup>4</sup>, MD, PhD, W.D.F. Venter<sup>3</sup>, MD, PhD, FCP (SA), A.G. Vos<sup>3,4</sup>, MD, PhD

6 <sup>1</sup>Amsterdam University Medical Centers, Location VU Medical Center, Department of Global  
7 Health, Vrije Universiteit, Amsterdam, The Netherlands

8 <sup>2</sup> Wits Sleep Laboratory, Brain Function Research Group, School of Physiology, Faculty of  
9 Health Sciences, University of Witwatersrand, Johannesburg, South Africa

10 <sup>3</sup> Ezintsha, a sub-division of Wits Reproductive Health and HIV Institute, University of  
11 Witwatersrand, Johannesburg, South Africa

12 <sup>4</sup>Julius Global Health, Julius Center for Health Sciences and Primary Care, University Medical  
13 Center Utrecht, Utrecht University, Utrecht, The Netherland

14 Corresponding author:

15 Alinda G. Vos

16 Address: Universiteitsweg 100, 3584 CG Utrecht. Fax: +31 88 75 68099.

17 Email: [a.g.vos-8@umcutrecht.nl](mailto:a.g.vos-8@umcutrecht.nl)

18 Phone: +31643747335

19 **Word count**

20 Manuscript excluding title page, abstract, acknowledgements, tables and references:  
21 2634 words

1  
2  
3  
4  
5  
6  
7  
8  
9  
10  
11  
12  
13  
14  
15  
16  
17  
18  
19  
20  
21  
22  
23  
24  
25  
26  
27  
28  
29  
30  
31  
32  
33  
34  
35  
36  
37  
38  
39  
40  
41  
42  
43  
44  
45  
46  
47  
48  
49  
50  
51  
52  
53  
54  
55  
56  
57  
58  
59  
60

1 **Keywords**

2 South-Africa, cardiovascular risk factors, Framingham risk score, Atherosclerotic  
3 Cardiovascular Disease risk, Left Ventricular Hypertrophy, Carotid Intima-Media  
4 Thickness

5 **Number of figures and tables**

6 Number of tables in manuscript: 2  
7 Number of tables in appendix: 16

For peer review only

## 1 **Abstract**

### 2 **Objectives:**

3 Cardiovascular disease (CVD) is a major problem globally. Truck drivers have an  
4 increased risk of CVD due to a sedentary lifestyle, irregular working hours and  
5 behavioral choices. We aimed to get insight into the contribution of night shift work  
6 to CVD risk in long-distance truck drivers in South Africa.

### 7 **Design:**

8 A cross-sectional study.

### 9 **Setting:**

10 Enrollment took place at three South African truck stop locations in two provinces;  
11 Bloemfontein (Free State), Pomona Road (Gauteng), and Soweto (Gauteng).

### 12 **Participants:**

13 607 males aged  $\geq 18$  years with full-time employment as a long-distance truck driver  
14 were included. The criteria for inclusion were willingness and being able to provide  
15 informed consent and to complete the study procedures.

### 16 **Primary and secondary outcome measures:**

17 Information was collected on sociodemographics, occupational and health  
18 characteristics. Physical measurements, an electrocardiogram (ECG), and carotid  
19 intima-media thickness (CIMT) measurements were taken. A night shift was defined  
20 as working at least 3 hours between 10pm and 6am once a week. CVD risk was  
21 defined with the Framingham Risk Score (FRS), the Atherosclerotic Cardiovascular  
22 Disease (ASCVD) risk algorithm, left ventricular hypertrophy (LVH), and CIMT.

### 23 **Results:**

24 In total, 607 truck drivers were included of which 305 (50.2%) worked in day shifts  
25 only and 302 (49.8%) worked day and night shifts. There was a high prevalence of  
26 CVD risk factors in both groups as 33% were hypertensive, 28% obese and 37% had  
27 abnormal lipid levels. Working day and night shifts compared to working only day

1 shifts did not result in differences in FRS, ASCVD risk, or LVH. No difference was  
2 found in CIMT measurements, except for the maximum bulb thickness which was  
3 higher in day shift workers.

#### 4 **Conclusions:**

5 CVD risk factors are considerably present in male truck drivers in South Africa. CVD  
6 risk does not differ between dayshift and day-night shift workers in this cross-  
7 sectional analysis.

#### 8 **Article summary**

##### 9 **Strengths and limitations of this study**

- 10 • This study presents the largest cohort of male truck drivers in Africa.
- 11 • Data collection was extensive and included demographics, work and life style  
12 related risk factors for diseases as well as physical measurements
- 13 • Cardiovascular disease risk was assessed with CVD risk scores, ECG and  
14 carotid intima media measurements.
- 15 • Night shift work was defined in several ways to account for the variation of  
16 definitions in literature.
- 17 • The influence of night shift work on CVD endpoints was investigated using  
18 multivariable regression models.

##### 19 **Study approval**

20 The study was approved by the Human Research Ethics Committee (Medical) of the  
21 University of Witwatersrand (reference number M160760).

## 1 Introduction

2 Cardiovascular disease (CVD) is the number one cause of death and a leading cause  
3 of disability globally. An estimated 17.9 million people died of CVD in 2016,  
4 representing 31% of all global deaths<sup>[1,2]</sup>. Over 75% of CVD events occur in low- and  
5 middle-income countries<sup>[3]</sup>. In South Africa, CVD is responsible for approximately  
6 20% of all deaths, making it the second leading cause of death after HIV/AIDS<sup>[4,5]</sup>. The  
7 cause of CVD is multifactorial and includes behavioral factors such as smoking,  
8 physical inactivity, unhealthy dietary patterns and lifestyle related conditions such as  
9 high cholesterol, high blood pressure, high body mass index (BMI) and high waist to  
10 hip ratio<sup>[6]</sup>.

11 Irregular working hours and night shifts are risk factors for CVD. In a large systematic  
12 review and meta-analysis published in 2018, which combined the results from 21  
13 cohort and case-control studies with a total of 173.010 unique participants, CVD risk  
14 increases with 7.1% for every five years of shift work exposure after the first five  
15 years <sup>[7]</sup>. A second study shows that shift work in a cocoa processing company in  
16 Ghana is associated with risk factors of CVD such as higher BMI and higher cholesterol  
17 levels<sup>[8]</sup>. A possible reason for the increase in CVD risk may be circadian  
18 misalignment. Circadian misalignment reflects a non-optimal scheduling of  
19 behavioral and environmental cycles such as sleep/wake, fasting/feeding,  
20 rest/activity, dark/light cycles, with respect to endogenous biological processes  
21 governed by the circadian system, such as blood pressure, hormones, and  
22 inflammation factors<sup>[9]</sup>.

23 Truck drivers are a high risk population for CVD by virtue of their occupation with  
24 long working hours, frequent shift work, low physical activity and high levels of  
25 sedentary behavior. There is a high prevalence of risk factors contributing to CVD in  
26 truck drivers in South Africa such as smoking, obesity, hypercholesterolemia,  
27 hypertension, and abnormal glucose levels<sup>[10,11]</sup>. This study aims to gain insight into  
28 the contribution of night shift work to CVD risk in long-distance truck drivers in South

1  
2  
3 1 Africa by comparing truck drivers who work day shifts only to truck drivers who  
4 2 work day and night shifts.

### 3 **Methods**

#### 4 **Study design and setting**

5 This analysis is a secondary data analysis of The Trucker Health Survey (THS). The  
6 THS was an initiative of the Wits Reproductive Health and HIV Institute (Wits RHI), a  
7 department of the University of the Witwatersrand, and North-Star Alliance (NSA).  
8 NSA provided health care services to truck drivers through a network of Roadside  
9 Wellness Centers located at busy truck stops and at border crossings<sup>[12]</sup>. Methods and  
10 characteristics of the THS have been described previously<sup>[13]</sup>. Enrollment took place  
11 between October 2016 and March 2017 in three South African locations in two  
12 provinces; Bloemfontein (Free State), Pomona Road (Gauteng), and Soweto  
13 (Gauteng). The truck stop in Soweto was added from January to March 2017 to reach  
14 a sufficient number of South African participants. Information was collected during a  
15 single visit.

16 The study was approved by the Research Ethics Committee of the University of the  
17 Witwatersrand (reference number M160760). Participation was voluntary, and  
18 written informed consent was obtained by a research nurse or counselor who spoke  
19 the same language as the participant.

#### 20 **Study population and inclusion criteria**

21 Males aged 18 years and older with full-time employment as a long-distance truck  
22 driver were included. The criteria for inclusion were willingness and being able to  
23 provide informed consent and to complete the study procedures. All participants with  
24 data on shift work available were eligible for this analysis.

## 1 Patient and Public involvement statement

2 Patients and the public were not involved in the study design, or in the recruitment  
3 to and conduct of the study. Results cannot be disseminated to study participants  
4 directly due to insufficient contact information.

## 5 Evaluation

6 Information on socio-demographic (i.e., age, education, country of origin, marital  
7 status), occupational (i.e., time spent working, working night shifts), behavioral (i.e.,  
8 smoking status, physical activity, sleep duration per day) and health (i.e., HIV status,  
9 diabetes treatment, hypertension treatment) characteristics were collected using  
10 validated questionnaires<sup>[14-17]</sup>. An overview of the survey and all questionnaires that  
11 have been used can be found in the previously published methodology paper<sup>[13]</sup>. The  
12 main definition for night shifts was working at least three hours once a week between  
13 10pm and 6am, the remaining was defined as dayshift workers. Night shift truck  
14 drivers worked either one night shift a week, two to three night shifts a week or more  
15 than four night shifts a week. We used those different cut-offs in a sensitivity analysis  
16 to investigate whether an increased number of nights shifts would be associated with  
17 increased CVD risk.

18 CVD risk was defined with four different outcome measures namely the Framingham  
19 Risk Score (FRS), the Atherosclerotic Cardiovascular Disease (ASCVD) risk algorithm,  
20 left ventricular hypertrophy (LVH) on electrocardiogram (ECG) and carotid intima-  
21 media thickness (CIMT)<sup>[18,19]</sup>.

22 Physical measurements included measurement of blood pressure, waist and hip  
23 circumference, height and weight. Blood was collected for measurement of total  
24 cholesterol, high-density-lipoprotein (HDL) cholesterol, low-density-lipoprotein  
25 (LDL) cholesterol, triglycerides (TG), random glucose and creatinine. Blood pressure  
26 was categorized as normal, pre-hypertension and hypertension<sup>[20]</sup>. Cut-off points for  
27 glucose and cholesterol were chosen according to international guidelines<sup>[21,22]</sup>.

1  
2  
3 1 Estimated glomerular filtration rate (eGFR) was calculated using creatinine levels and  
4 presented in stages of chronic kidney disease<sup>[23]</sup>.

5  
6  
7  
8 3 CVD risk according to the FRS was calculated and categorized in low-, intermediate-  
9 and high-CVD risk<sup>[18,24]</sup>. The ASCVD risk algorithm was calculated for participants  
10 between the age of 40 to 70 according to algorithm guidelines<sup>[19,22]</sup>.

11  
12  
13  
14 6 A standard 12 lead ECG was performed by a trained nurse with a computer-based  
15 ECG device (SE-1515 DP12, EDAN)<sup>[25]</sup> to record heart rate, rhythm and conduction  
16 time. LVH was assessed using Cornell's voltage (RaVL+SV<sub>3</sub>), Cornell's product  
17 ((RaVL+SV<sub>3</sub>) x QRS duration) and Sokolow-Lyon's voltage (SV<sub>1</sub>+RV<sub>5</sub>). LVH was  
18 defined as Cornell's voltage ≥ 28mV, Cornell's product > 2440 mV·ms or Sokolow-  
19 Lyon's voltage ≥ 35mV<sup>[26-29]</sup>. The combined outcome of LVH was deemed positive if  
20 one or more criteria indicated LVH.

21  
22  
23  
24  
25  
26  
27 13 CIMT was measured in 217 (42.9%) participants, dependent on the availability of a  
28 sonographer. A Siemens Acuson p500 ultrasound (Siemens Healthcare (Pty) Ltd,  
29 South Africa) with a ≥ 7MHz linear probe was used. Measurements of the near wall  
30 and the far wall of the common carotid artery (CCA) were taken at three standardized  
31 angles each side using the Meijer's Arc<sup>[30]</sup>. At bulb level, the far wall was measured at  
32 the best visible angle at both sides. The images were analyzed off-line in batch with  
33 the semi-automatically Artery Measurement System software (Chalmers University,  
34 Göteborg, Sweden). The mean of the mean common carotid artery intima-media  
35 thickness (CCA-IMT) and the max of the mean CCA-IMT were calculated by averaging  
36 the near and far wall measurements across the three angles on both sides. Mean-max  
37 bulb IMT was calculated using bilateral measurements of the bulb far wall. A mean  
38 CCA-IMT of > 1.0mm at any of the measured angles was considered a carotid  
39 plaque<sup>[31,32]</sup>.

## 26 **Statistical analysis**

27 Analyses were done using SPSS version 25.0 (SPSS Inc. Chicago, IL, USA). A  $p \leq 0.05$   
28 was considered to be statistically significant. Categorical variables were represented



1 as counts with percentages. All continuous outcomes were non-normally distributed  
2 and summarized using median with interquartile range (IQR). Non-normally  
3 distributed data was transformed using the Box-Cox technique combined with a  
4 goodness of fit test using normal, lognormal and exponential distributions. To test  
5 how cardiovascular measures differed between day and night shift workers a Chi-  
6 square test was used for categorical outcomes and a Mann-Whitney-U test was used  
7 for continuous outcomes. Next, regression analysis was used to assess the influence  
8 of shift work on FRS, ASCVD risk, mean CCA-IMT and LVH while adjusting for  
9 confounders. Variables considered as confounders were age, country of origin,  
10 education level and relationship status<sup>[33]</sup>. We did not adjust for known CVD risk  
11 factors as outcomes represent the cumulative effect of CVD risk factors. Variables  
12 were included in multivariable analysis if the p-value was  $\leq 0.20$  in univariable  
13 analysis. Age was added to the multivariable model independent of the p-value in  
14 univariable analysis. FRS, ASCVD and mean CCA-IMT were log transformed to meet  
15 criteria for normal distribution.

16 In a sensitivity analysis, above described analyses were repeated using different cut-  
17 off points for night shift work, namely zero to one night shift a week, two to three  
18 night shifts a week or four or more night shifts a week. Finally, all analyses were  
19 repeated including only truck drivers who had been working as a truck driver for  
20 more than 10 years (n = 229 out of 607).

## 21 Results

22 In total, 614 male truck drivers completed the survey, of which 607 (99%) had data  
23 on shift work available. Nearly half (n=305, 50.2%) worked in day shifts only and 302  
24 drivers (49.8%) worked both day and night shifts (Table 1).

25 There were no drivers who only worked night shifts. The median age was 37 (IQR:  
26 31-42) years. The majority of the drivers were from Zimbabwe (62.5%), followed by  
27 South Africa (20.2%). The drivers had worked for a median duration of 9 (IQR: 5-14)  
28 years as a truck driver. There was a high prevalence of CVD risk factors in both groups

1 as 28% of participants were obese, 33% hypertensive and >35% had abnormal LDL  
2 and TG levels. No significant differences were seen between the groups for most of  
3 the CVD risk factors. The day-night shift group had a higher activity score ( $p = 0.02$ ),  
4 higher neck circumference ( $p < 0.01$ ) and a lower waist to hip ratio ( $p = 0.03$ ) than  
5 the participants who worked day shifts only.

6 Shift work was borderline associated with a difference in FRS ( $p = 0.05$ ) as continuous  
7 outcome, but there was no difference between the groups when categorized in low,  
8 intermediate and high risk ( $p = 0.57$ ). Shift work was not associated with ASCVD risk  
9 score ( $p = 0.94$ ), LVH occurrence (all  $p > 0.20$ ) or CIMT, except for max bulb IMT,  
10 which was higher in day shift workers compared to day-night shift workers ( $p < 0.01$ )  
11 (Table 2).

12 Following multivariable regression analysis shift work was not associated with any  
13 of the cardiovascular outcomes. Factors associated with higher FRS and ASCVD were  
14 increasing age ( $p < 0.01$  for both), having finished primary school or less ( $p = 0.01$  and  
15  $p < 0.01$  respectively), and a stable relationship ( $p < 0.01$  for both). An increase in age  
16 ( $p < 0.01$ ) was associated with an increase in mean CCA-IMT. A stable relationship  
17 was positively associated with LVH ( $p < 0.01$ ) (Appendix 1).

18 Repeating the analysis using different definitions for night shift work resulted in the  
19 same findings (Appendix 2-3). Limiting the analysis to truck drivers who had been  
20 working as a truck driver for more than 10 years ( $n=229$ ) did also not show a  
21 difference in CVD outcomes between day and day-night shift workers (Appendix 4).

## 22 Discussion

23 Our study provides insight into the role of shift work on CVD risk in truck drivers in  
24 South Africa and possibly sub-Saharan Africa. We did not find an association between  
25 shift work and CVD risk according to the FRS strata, the ASCVD risk score, LVH, and  
26 CIMT.

1  
2  
3  
4  
5  
6  
7  
8  
9  
10  
11  
12  
13  
14  
15  
16  
17  
18  
19  
20  
21  
22  
23  
24  
25  
26  
27  
28  
29  
30  
31  
32  
33  
34  
35  
36  
37  
38  
39  
40  
41  
42  
43  
44  
45  
46  
47  
48  
49  
50  
51  
52  
53  
54  
55  
56  
57  
58  
59  
60

1 Our results are in line with recent studies done in cohorts of hospital workers. A study  
2 including female hospital employees showed that shiftwork was not directly linked  
3 to CVD risk<sup>[34]</sup>. Another study on health care workers employed in hospitals found no  
4 difference in metabolic risk factors between day and night shift workers<sup>[35]</sup>. Similar  
5 results were seen in a Finnish cohort study with a 20-year follow-up period as no  
6 association between shift work and cardiovascular morbidity was observed<sup>[36]</sup>.

7 However, other studies did find an increased CVD risk for night shift workers. In a  
8 systematic review and meta-analysis, shift work for more than five years had a  
9 positive and significant dose-response relationship on CVD risk. Shift work less than  
10 five years did not have a relation with CVD risk<sup>[7]</sup>. Another study, also a systematic  
11 review and meta-analysis, demonstrated that an increase in shift work of five years  
12 was associated with a five percent increase in the risk of CVD<sup>[37]</sup>. A third single site  
13 study with nearly 2000 participants showed that in male petrochemical plant  
14 workers, exposure to night shift work for over 20 years leads to a significant higher  
15 risk of getting hypertension<sup>[38]</sup>. Our study lacked data on intensity and duration of  
16 nightshifts so a dose-response relationship could not be investigated. Secondly, the  
17 group of truck drivers in our dataset who worked longer than 20 years was too small  
18 to do additional analysis.

19 Our findings on the abundance of CVD risk factors are in line with other studies that  
20 showed that CVD risk factors are notably present in truck drivers<sup>[39,40]</sup>. In the South  
21 African Demographic and Health Survey including almost 14.000 participants with a  
22 mean age of 38.5 years, the overall prevalence of hypertension was 30% and the  
23 prevalence of obesity was 20%<sup>[41]</sup>. In a population study in the northern part of South  
24 Africa, including 3641 participants (64% males, median age <30 years), 30% of the  
25 men had hypertension, 5% were obese and up to 20% had disturbances in lipid  
26 levels<sup>[42]</sup>.

27 In our population the mean age was 37.6 years. Hypertension occurred in 33% of the  
28 participants, and 28% were obese. In our study up to 37% of the participants had  
29 abnormal lipid levels. To summarize, it seems that in our study there is a comparable

1 percentage of hypertension, but increased percentage of obesity and abnormal  
2 cholesterol levels compared to the general population.

3 Some limitations need to be mentioned. The first relates to our definition of night  
4 shifts, as only 3 hours of work between 10pm and 6am classified someone as a night  
5 shift worker. To account for this, we did additional sensitivity analyses using different  
6 cut-offs for the number of nights worked in a week. Unfortunately we did not have  
7 information on the exact number of hours worked per night nor did we have  
8 information on the time a driver had been involved in shiftwork. This limits our  
9 analysis on the dose-response relationship between shiftwork and CVD risk.

10 Another limitation is potential bias due to the healthy worker effect. Workers who  
11 are relatively fitter might do night shifts more often and will continue to do night  
12 shifts for a longer period of time. More unhealthy workers might possibly switch to  
13 day shifts only or to a different job. Although CVD risk factors did not differ between  
14 day and night shift workers there might be unmeasured risk factors leading to an  
15 underestimation of the influence of night shift work on CVD risk.

16 The combined LVH outcome may result in an overestimation of the number of  
17 participants without also conducting cardiac echocardiography which is considered  
18 the gold standard measure. CIMT data were only available for 43% of the participants.  
19 This limits the power, but as CIMT scans were omitted randomly and the number of  
20 missing scans was evenly divided over the groups, we do not expect that this would  
21 result in a bias.

22 A major strength of this study is the size of the study with 607 truck drivers, of whom  
23 half were working day-night shifts. This is the largest cohort of male truck drivers in  
24 South Africa and to the best of our knowledge, the largest in Africa. Our data  
25 represents the situation in the general truck driver community in South Africa and  
26 beyond as drivers from several African countries were included at public truck stops.  
27 Another strength is that we defined CVD risk in complementary ways using four

1 different outcome measures namely FRS, ASCVD, LVH on ECG and CIMT in  
2 combination with the wide variety of physical measurements.

### 3 **Conclusion**

4 CVD risk factors are abundantly present in male long-haul truck drivers in South  
5 Africa. CVD risk does not differ between dayshift and day-night shift workers in this  
6 cross-sectional analysis. Nevertheless, the high prevalence of CVD risk factors in this  
7 male cohort necessitates further investigation to develop and implement strategies  
8 to reduce CVD risk.

### 9 **Author contributions**

10 Designed the study: MD, AGV, WDFV, DEG. Acquisition of data: SLE, WDFV, AGV.  
11 Analysed the data and interpreted results: MD, KS, STLE, AF, AGV. Wrote the initial  
12 draft: MD, AGV. All authors critically reviewed and approved of the final draft.

### 13 **Conflict of interest statement**

14 The authors declare that there is no conflict of interest.

### 15 **Funding**

16 This work was funded by North Star Alliance through a research and implementation  
17 grant received from the Ministry of Foreign Affairs of the Netherlands, managed by  
18 the Royal Dutch Embassy of Mozambique. The Amsterdam Institute for Global Health  
19 and Development (AIGHD) and Wits RHI held separate contracts with North Star  
20 Alliance (AIGHD's grant reference: 0068 North Star – NSCDP; WRHI's grant number:  
21 D1404070).

1  
2  
3 1 The views of this study are those of the authors and do not necessarily reflect the  
4 2 views of any of the funders or the South African and Dutch governments.

### 3 **Data availability statement**

4 Deidentified participant data are available upon reasonable request by contacting  
5 the corresponding author.

### 6 **Study approval**

7 The study was approved by the Human Research Ethics Committee (Medical) of the  
8 University of Witwatersrand (reference number M160760).

### 9 **References**

- 10 1. Goff Jr DC, Lloyd-Jones DM, Bennett G, et al. 2013 ACC/AHA guideline on the  
11 assessment of cardiovascular risk: a report of the American College of  
12 Cardiology/American Heart Association Task Force on Practice Guidelines. J  
13 Am Coll Cardiol. 2014;63(25 Pt B):2935-2959.  
14 doi:10.1016/j.jacc.2013.11.005
- 15 2. Benjamin EJ, Blaha MJ, Chiuve SE, et al. Heart Disease and Stroke Statistics-  
16 2017 Update: A Report From the American Heart Association. Circulation.  
17 2017;135(10):e146-e603. doi:10.1161/CIR.0000000000000485
- 18 3. WHO. Cardiovascular diseases fact sheet. Geneva: World Health Organization,  
19 May 2017. [https://www.who.int/news-room/fact-](https://www.who.int/news-room/fact-sheets/detail/cardiovascular-diseases-(cvds))  
20 [sheets/detail/cardiovascular-diseases-\(cvds\)](https://www.who.int/news-room/fact-sheets/detail/cardiovascular-diseases-(cvds)). Accessed February 4, 2019.
- 21 4. Wyk VP, Msemburi W, Laubscher R, et al. Second National Burden of Disease  
22 Study South Africa: national and subnational mortality trends, 1997-2009.  
23 Lancet. 2013;381:S113. doi:10.1016/S0140-6736(13)61367-7
- 24 5. Mortality and causes of death in South Africa, 2016: Findings from death  
25 notification / Statistics South Africa. Pretoria: Statistics South Africa, 2016.  
26 <http://www.statssa.gov.za/publications/P03093/P030932016.pdf>. Accessed  
27 February 5, 2019.

- 1 6. Kannel WB, Dawber TR, Kagan A, Revotskie N, Stokes III J. Factors of Risk in  
2 the Development of Coronary Heart Disease—Six-Year Follow-up  
3 Experience: The Framingham Study. *Ann Intern Med.* 1961;55(1):33-50.  
4 doi:10.7326/0003-4819-55-1-33
- 5 7. Torquati L, Mielke GI, Brown WJ, Kolbe-Alexander T. Shift work and the risk  
6 of cardiovascular disease. A systematic review and meta-analysis including  
7 dose-response relationship. *Scand J Work Environ Heal.* 2018;44(3):229-238.  
8 doi:10.5271/sjweh.3700
- 9 8. Asare-Anane H, Abdul-Latif A, Ofori EK, Abdul-Rahman M, Amanquah SD.  
10 Shift work and the risk of cardiovascular disease among workers in cocoa  
11 processing company, Tema. *BMC Res Notes.* 2015. doi:10.1186/s13104-015-  
12 1750-3
- 13 9. Morris CJ, Yang JN, Scheer FAJL. The impact of the circadian timing system on  
14 cardiovascular and metabolic function. *Prog Brain Res.* 2012;199:337-358.  
15 doi:10.1016/B978-0-444-59427-3.00019-8
- 16 10. Robinson CF, Burnett CA. Truck drivers and heart disease in the United  
17 States, 1979–1990. *Am J Ind Med.* 2005;47(2):113-119.  
18 doi:10.1002/ajim.20126
- 19 11. Birdsey J, Sieber WK, Chen GX, et al. National Survey of US Long-Haul Truck  
20 Driver Health and Injury: Health Behaviors. *J Occup Environ Med.*  
21 2015;57(2).
- 22 12. Lalla-Edward ST, Ncube S, Matthew P, Hankins CA, Venter WDF, Gomez GB.  
23 Uptake of health services among truck drivers in South Africa: Analysis of  
24 routine data from nine roadside wellness centres. *BMC Health Serv Res.*  
25 2017. doi:10.1186/s12913-017-2595-3
- 26 13. Lalla-Edward ST, Fischer AE, Venter WDF, et al. Cross-sectional study of the  
27 health of southern African truck drivers. *BMJ Open.* 2019;9(10):e032025.  
28 doi:10.1136/bmjopen-2019-032025
- 29 14. Creel AH, Rimal RN. Factors related to HIV-testing behavior and interest in  
30 testing in Namibia. *AIDS Care.* 2011;23(7):901-907.  
31 doi:10.1080/09540121.2010.540227

- 1 15. Buysse DJ, Reynolds CF, Monk TH, Berman SR, Kupfer DJ. The Pittsburgh  
2 sleep quality index: A new instrument for psychiatric practice and research.  
3 Psychiatry Res. 1989;28(2):193-213. doi:[https://doi.org/10.1016/0165-  
4 1781\(89\)90047-4](https://doi.org/10.1016/0165-1781(89)90047-4)
- 5 16. Amireault S, Godin G. The Godin-Shephard leisure-time physical activity  
6 questionnaire: Validity evidence supporting its use for classifying healthy  
7 adults into active and insufficiently active categories. Percept Mot Skills.  
8 2015. doi:[10.2466/03.27.PMS.120v19x7](https://doi.org/10.2466/03.27.PMS.120v19x7)
- 9 17. World Health Organization (2005). WHO STEPS Surveillance Manual: The  
10 WHO STEPwise approach to chronic disease risk factor surveillance. Geneva,  
11 World Health Organization.
- 12 18. D'Agostino RB, Vasan RS, Pencina MJ, et al. General cardiovascular risk  
13 profile for use in primary care: The Framingham heart study. Circulation.  
14 2008. doi:[10.1161/CIRCULATIONAHA.107.699579](https://doi.org/10.1161/CIRCULATIONAHA.107.699579)
- 15 19. Lloyd-Jones DM, Huffman MD, Karmali KN, et al. Estimating Longitudinal  
16 Risks and Benefits From Cardiovascular Preventive Therapies Among  
17 Medicare Patients: The Million Hearts Longitudinal ASCVD Risk Assessment  
18 Tool: A Special Report From the American Heart Association and American  
19 College of Cardiol. J Am Coll Cardiol. 2017;69(12):1617-1636.  
20 doi:<https://doi.org/10.1016/j.jacc.2016.10.018>
- 21 20. Chobanian A V., Bakris GL, Black HR, et al. Seventh report of the Joint  
22 National Committee on Prevention, Detection, Evaluation, and Treatment of  
23 High Blood Pressure. Hypertension. 2003.  
24 doi:[10.1161/01.HYP.0000107251.49515.c2](https://doi.org/10.1161/01.HYP.0000107251.49515.c2)
- 25 21. NICE. Type 2 diabetes in adults: management. Natl Inst Heal Care Excell.  
26 2018.
- 27 22. Grundy SM, Stone NJ, Bailey AL, et al. 2018  
28 AHA/ACC/AACVPR/AAPA/ABC/ACPM/ADA/AGS/APhA/ASPC/NLA/PCNA  
29 Guideline on the Management of Blood Cholesterol: A Report of the American  
30 College of Cardiology/American Heart Association Task Force on Clinical



- 1  
2  
3 1 Practice Guidelines. *J Am Coll Cardiol*. 2018.  
4  
5 2 doi:<https://doi.org/10.1016/j.jacc.2018.11.003>  
6  
7 3 23. Levey AS, Bosch JP, Lewis JB, Greene T, Rogers N, Roth D. A more accurate  
8  
9 4 method to estimate glomerular filtration rate from serum creatinine: a new  
10  
11 5 prediction equation. Modification of Diet in Renal Disease Study Group. *Ann*  
12  
13 6 *Intern Med*. 1999.  
14  
15 7 24. Sytkowski PA, Kannel WB, D'Agostino RB. Changes in Risk Factors and the  
16  
17 8 Decline in Mortality from Cardiovascular Disease. *N Engl J Med*.  
18  
19 9 1990;322(23):1635-1641. doi:10.1056/NEJM199006073222304  
20  
21 10 25. Alfakih K, Walters K, Jones T, Ridgway J, S. HA, Mohan S. New Gender-Specific  
22  
23 11 Partition Values for ECG Criteria of Left Ventricular Hypertrophy.  
24  
25 12 *Hypertension*. 2004;44(2):175-179.  
26  
27 13 doi:10.1161/01.HYP.0000135249.66192.30  
28  
29 14 26. Casale PN, Devereux RB, Alonso DR, Campo E, Kligfield P. Improved sex-  
30  
31 15 specific criteria of left ventricular hypertrophy for clinical and computer  
32  
33 16 interpretation of electrocardiograms: Validation with autopsy findings.  
34  
35 17 *Circulation*. 1987. doi:10.1161/01.CIR.75.3.565  
36  
37 18 27. Devereux RB, Casale PN, Eisenberg RR, Miller DH, Kligfield P.  
38  
39 19 Electrocardiographic detection of left ventricular hypertrophy using  
40  
41 20 echocardiographic determination of left ventricular mass as the reference  
42  
43 21 standard: Comparison of standard criteria, computer diagnosis and physician  
44  
45 22 interpretation. *J Am Coll Cardiol*. 1984. doi:10.1016/S0735-1097(84)80433-  
46  
47 23 7  
48  
49 24 28. Sokolow M, Lyon TP. The ventricular complex in left ventricular hypertrophy  
50  
51 25 as obtained by unipolar precordial and limb leads. *Am Heart J*. 1949.  
52  
53 26 doi:10.1016/0002-8703(49)90562-1  
54  
55 27 29. Okin PM, Roman MJ, Devereux RB, Kligfield P. Electrocardiographic  
56  
57 28 identification of increased left ventricular mass by simple voltage-duration  
58  
59 29 products. *J Am Coll Cardiol*. 1995. doi:10.1016/0735-1097(94)00371-V  
60  
30 30. Bots ML, Evans GW, Tegeler CH, Meijer R. Carotid Intima-media Thickness  
31  
Measurements: Relations with Atherosclerosis, Risk of Cardiovascular

- 1  
2  
3 1 Disease and Application in Randomized Controlled Trials. *Chin Med J (Engl)*.  
4 2016;129(2):215-226. doi:10.4103/0366-6999.173500  
5 2  
6 31. Boulos NM, Gardin JM, Malik S, Postley J, Wong ND. Carotid Plaque  
7 4 Characterization, Stenosis, and Intima-Media Thickness According to Age and  
8 5 Gender in a Large Registry Cohort. *Am J Cardiol*. 2016;117(7):1185-1191.  
9 6 doi:10.1016/j.amjcard.2015.12.062  
10 7 32. Naqvi TZ, Lee M-S. Carotid Intima-Media Thickness and Plaque in  
11 8 Cardiovascular Risk Assessment. *JACC Cardiovasc Imaging*. 2014;7(10):1025-  
12 9 1038. doi:https://doi.org/10.1016/j.jcmg.2013.11.014  
13 10 33. Kiecolt-Glaser JK, Newton TL. Marriage and health: His and hers. *Psychol Bull*.  
14 11 2001. doi:10.1037/0033-2909.127.4.472  
15 12 34. Lajoie P, Aronson KJ, Day A, Tranmer J. A cross-sectional study of shift work,  
16 13 sleep quality and cardiometabolic risk in female hospital employees. *BMJ*  
17 14 *Open*. 2015. doi:10.1136/bmjopen-2014-007327  
18 15 35. Loef B, Van Baarle D, Van Der Beek AJ, Beekhof PK, Van Kerkhof LW, Proper  
19 16 KI. The association between exposure to different aspects of shift work and  
20 17 metabolic risk factors in health care workers, and the role of chronotype.  
21 18 *PLoS One*. 2019. doi:10.1371/journal.pone.0211557  
22 19 36. Wang A, Arah OA, Kauhanen J, Krause N. Shift work and 20-year incidence of  
23 20 acute myocardial infarction: Results from the Kuopio Ischemic Heart Disease  
24 21 Risk Factor Study. *Occup Environ Med*. 2016. doi:10.1136/oemed-2015-  
25 22 103245  
26 23 37. Wang D, Ruan W, Chen Z, Peng Y, Li W. Shift work and risk of cardiovascular  
27 24 disease morbidity and mortality: A dose-response meta-analysis of cohort  
28 25 studies. *Eur J Prev Cardiol*. 2018. doi:10.1177/2047487318783892  
29 26 38. Yeom JH, Sim CS, Lee J, et al. Effect of shift work on hypertension: Cross  
30 27 sectional study. *Ann Occup Environ Med*. 2017. doi:10.1186/s40557-017-  
31 28 0166-z  
32 29 39. Sieber WK, Robinson CF, Birdsey J, et al. Obesity and other risk factors: the  
33 30 national survey of U.S. long-haul truck driver health and injury. *Am J Ind Med*.  
34 31 2014;57(6):615-626. doi:10.1002/ajim.22293

Table 1. Characteristics of the study population

|                                                      | <b>Participants<br/>(n=607)</b> | <b>Day shifts<br/>(n=305)</b> | <b>Day-night shifts<br/>(n=302)</b> |
|------------------------------------------------------|---------------------------------|-------------------------------|-------------------------------------|
| Age (years), median (IQR)                            | 37 (31-42)                      | 37 (32-43)                    | 36 (30-42)                          |
| Country of origin, n                                 | 605                             | 303                           | 302                                 |
| Zimbabwe, n (%)                                      | 378 (62.5%)                     | 188 (62.0%)                   | 190 (62.9%)                         |
| South Africa, n (%)                                  | 122 (20.2%)                     | 60 (19.8%)                    | 62 (20.5%)                          |
| Zambia, n (%)                                        | 45 (7.4%)                       | 24 (7.9%)                     | 21 (7.0%)                           |
| Other, n (%)                                         | 60 (9.9%)                       | 31 (10.2%)                    | 29 (9.6%)                           |
| Working as driver (years), median (IQR)              | 9 (5-14)                        | 9 (5-14)                      | 8 (5-14)                            |
| Time spent working per month (days),<br>median (IQR) | 20 (15-24)                      | 20 (18-24)                    | 20 (15-24)                          |
| Time sleeping/day (hours), median (IQR)              | 8 (6-9)                         | 8 (6-9)                       | 7.5 (6-9)                           |
| Education level, n                                   | 585                             | 287                           | 298                                 |
| Primary school or less, n (%)                        | 51 (8.7%)                       | 32 (11.1%)                    | 19 (6.4%)                           |
| Secondary school, n (%)                              | 322 (55.0%)                     | 150 (52.3%)                   | 172 (57.7%)                         |
| Matrix/college/university, n (%)                     | 212 (36.2%)                     | 105 (36.6%)                   | 107 (35.9%)                         |
| Marital status, n                                    | 607                             | 305                           | 302                                 |
| Stable relationship, n (%)                           | 545 (89.8%)                     | 278 (91.1%)                   | 267 (88.4%)                         |

- 1 40. Korelitz JJ, Fernandez AA, Uyeda VJ, Spivey GH, Browdy BL, Schmidt RT.  
2 Health habits and risk factors among truck drivers visiting a health booth  
3 during a trucker trade show. *Am J Heal Promot.* 1993. doi:10.4278/0890-  
4 1171-8.2.117
- 5 41. Kandala NB, Tigbe W, Manda SO, Stranges S. Geographic variation of  
6 hypertension in sub-Saharan Africa: A case study of South Africa. *Am J*  
7 *Hypertens.* 2013. doi:10.1093/ajh/hps063
- 8 42. Clark SJ, Gómez-Olivé FX, Houle B, et al. Cardiometabolic disease risk and HIV  
9 status in rural South Africa: Establishing a baseline. *BMC Public Health.* 2015.  
10 doi:10.1186/s12889-015-1467-1

|                                                 |                  |                  |                  |
|-------------------------------------------------|------------------|------------------|------------------|
| No relationship, n (%)                          | 62 (10.2%)       | 27 (8.9%)        | 35 (11.6%)       |
| HIV positive, n (%)                             | 54 (8.9%)        | 24 (7.9%)        | 30 (9.9%)        |
| Weekly leisure activity score, median (IQR)     | 17 (0-27)        | 17 (0-19)        | 17 (0-31)        |
| Body mass index (kg/cm <sup>2</sup> ), n        | 597              | 298              | 299              |
| Body mass index < 30 kg/cm <sup>2</sup> , n (%) | 428 (71.7%)      | 220 (73.8%)      | 208 (69.6%)      |
| Body mass index ≥ 30 kg/cm <sup>2</sup> , n (%) | 169 (28.3%)      | 78 (26.2%)       | 91 (30.4%)       |
| Waist to hip ratio, median (IQR)                | 0.86 (0.81-0.91) | 0.87 (0.82-0.92) | 0.85 (0.80-0.91) |
| Neck circumference (cm), median (IQR)           | 37 (36-39)       | 37 (35-39)       | 38 (36-40)       |
| Smoking ever in life, n (%)                     | 90 (14.9%)       | 47 (15.6%)       | 43 (14.2%)       |
| Family history for CVD, n (%)                   | 32 (5.3%)        | 14 (4.7%)        | 18 (6.0%)        |
| Heart rate (bpm), median (IQR)                  | 75 (66-83)       | 75 (68-83)       | 75 (65-83)       |
| Blood pressure classification, n                | 594              | 297              | 297              |
| Normal, n (%)                                   | 100 (16.8%)      | 43 (14.5%)       | 57 (19.2%)       |
| Pre-hypertension <sup>a</sup> , n (%)           | 297 (50.0%)      | 159 (53.5%)      | 138 (46.5%)      |
| Hypertension <sup>b</sup> or Tx, n (%)          | 197 (33.2%)      | 95 (32.0%)       | 102 (34.3%)      |
| Serum glucose, n                                | 457              | 234              | 223              |
| ≥ 7.8mmol/L or Tx, n (%)                        | 38 (8.3%)        | 18 (7.7%)        | 20 (9.0%)        |
| < 7.8mmol/L, n (%)                              | 419 (91.7%)      | 216 (92.3%)      | 203 (91.0%)      |
| Serum Creatinine                                | 586              | 296              | 290              |
| ≥ 110 mmol/L, n (%)                             | 102 (17.4%)      | 58 (19.6%)       | 44 (15.2%)       |
| < 110 mmol/L, n (%)                             | 484 (82.6%)      | 238 (80.4%)      | 246 (84.8%)      |
| eGFR <sup>c</sup>                               | 586              | 296              | 290              |
| ≥ 90ml/min/1.73m <sup>2</sup> , n (%)           | 440 (75.1%)      | 212 (71.6%)      | 228 (78.6%)      |
| 60-90ml/min/1.73m <sup>2</sup> , n (%)          | 139 (23.7%)      | 80 (27.0%)       | 59 (20.3%)       |
| < 60ml/min/1.73m <sup>2</sup> , n (%)           | 7 (1.2%)         | 4 (1.4%)         | 3 (1.1%)         |
| Total cholesterol                               | 587              | 296              | 291              |
| ≥ 5.17 mmol/L, n (%)                            | 140 (23.9%)      | 77 (26.0%)       | 63 (21.6%)       |
| < 5.17 mmol/L, n (%)                            | 447 (76.1%)      | 219 (74.0%)      | 228 (78.4%)      |
| HDL cholesterol                                 | 587              | 296              | 291              |
| ≤ 1.04 mmol/L, n (%)                            | 151 (25.7%)      | 79 (26.7%)       | 72 (24.7%)       |
| > 1.04 mmol/L, n (%)                            | 436 (74.3%)      | 217 (73.3%)      | 219 (75.3%)      |
| LDL cholesterol                                 | 587              | 296              | 291              |

|                                                                                                                                                                                                                |                     |             |             |             |
|----------------------------------------------------------------------------------------------------------------------------------------------------------------------------------------------------------------|---------------------|-------------|-------------|-------------|
|                                                                                                                                                                                                                | ≥ 3.0 mmol/L, n (%) | 217 (37.0%) | 113 (38.2%) | 104 (35.7%) |
|                                                                                                                                                                                                                | < 3.0 mmol/L, n (%) | 370 (63.0%) | 183 (61.8%) | 187 (64.3%) |
| Triglycerides                                                                                                                                                                                                  |                     | 587         | 296         | 291         |
|                                                                                                                                                                                                                | ≥ 1.7 mmol/L, n (%) | 211 (35.9%) | 116 (39.2%) | 95 (32.6%)  |
|                                                                                                                                                                                                                | < 1.7 mmol/L, n (%) | 376 (64.1%) | 180 (60.8%) | 196 (67.4%) |
| Abbreviations: <i>P</i> : p-value; IQR: Interquartile range; bpm: beats per minute; Tx: on medication; eGFR: estimated glomerular filtration rate; HDL: High-density-lipoprotein; LDL: Low-density-lipoprotein |                     |             |             |             |
| a: Systolic blood pressure >120mmHg and/or diastolic blood pressure >80mmHg                                                                                                                                    |                     |             |             |             |
| b: Systolic blood pressure >140mmHg and/or diastolic blood pressure >90mmHg                                                                                                                                    |                     |             |             |             |
| c: Calculated using: $186 \times (\text{Creatinine}/88.4)^{-1.154} \times (\text{Age})^{-0.203} \times (0.742 \text{ if female}) \times (1.210 \text{ if black African})$                                      |                     |             |             |             |

1

Table 2. Cardiovascular risk assessments between dayshift only and day-night shift drivers.

|                                                  | Participants<br>(n=607) | Day shifts<br>(n=305) | Day-night shifts<br>(n=302) | <i>P</i>    |
|--------------------------------------------------|-------------------------|-----------------------|-----------------------------|-------------|
| Framingham risk score                            |                         |                       |                             |             |
| 10-year Framingham risk percentage, n            | 585                     | 295                   | 290                         | <b>0.05</b> |
| 10-year Framingham risk percentage, median (IQR) | 3.21 (1.66-5.99)        | 3.52 (1.95-6.23)      | 2.98 (1.47-5.56)            |             |
| Low risk (< 10%), n (%)                          | 518 (88.5%)             | 265 (89.8%)           | 253 (87.2%)                 |             |
| Intermediate risk (10-20%), n (%)                | 52 (9.0%)               | 24 (8.1%)             | 28 (9.7%)                   |             |
| High risk (> 20%), n (%)                         | 15 (2.5%)               | 6 (2.0%)              | 9 (3.1%)                    |             |
| ASCVD risk score                                 |                         |                       |                             |             |
| 10-year ASCVD risk percentage, n                 | 215                     | 111                   | 104                         | 0.94        |
| 10-year ASCVD risk percentage, median (IQR)      | 5.13 (3.62-7.20)        | 5.16 (3.64-6.66)      | 5.12 (3.57-7.63)            |             |
| Low risk (< 5%), n (%)                           | 103 (47.9)              | 54 (48.6%)            | 49 (47.1%)                  |             |
| Intermediate risk (5-20%), n (%)                 | 107 (49.8%)             | 55 (49.5%)            | 52 (50.0%)                  |             |
| High risk (≥ 20%), n (%)                         | 5 (2.3%)                | 2 (1.8%)              | 3 (2.9%)                    |             |
| Cornell LVH                                      |                         |                       |                             |             |

|                                       |     |                  |                  |             |
|---------------------------------------|-----|------------------|------------------|-------------|
| LVH based on Criteria > 2.8mV, n (%)  | 555 | 14 (4.9%)        | 9 (3.3%)         | 0.33        |
| LVH based on Product > 244mVms, n (%) | 547 | 18 (6.5%)        | 11 (4.1%)        | 0.21        |
| Solokow-Lyon LVH                      |     |                  |                  |             |
| LVH based on Criteria > 3.5mV, n (%)  | 581 | 92 (31.7%)       | 94 (32.3%)       | 0.88        |
| LVH combined, n (%)                   | 582 | 105 (36.1%)      | 104 (35.7%)      | 0.93        |
| CIMT                                  |     |                  |                  |             |
| mean CCA IMT (mm), median (IQR)       | 217 | 0.54 (0.50-0.70) | 0.52 (0.49-0.59) | 0.10        |
| max CCA IMT (mm), median (IQR)        | 217 | 0.62 (0.57-0.70) | 0.60 (0.55-0.66) | 0.12        |
| max bulb IMT (mm), median (IQR)       | 216 | 0.70 (0.60-0.86) | 0.61 (0.51-0.75) | <b>0.01</b> |
| Carotid plaque, n (%)                 | 216 | 5 (4.1%)         | 4 (4.3%)         | 0.93        |

*Abbreviations: P: p-value; IQR: Interquartile range; ASCVD: Arteriosclerotic cardiovascular disease; LVH: Left ventricular hypertrophy; CIMT: Carotid intima-media thickness; CCA: Common carotid artery; IMT: Intima media thickness*

## 1 Abbreviations

2 AIGHD: Amsterdam Institute for Global Health and Development

3 ASCVD: Atherosclerotic Cardiovascular Disease

4 BMI: Body-Mass Index

5 CCA: Common Carotid Artery

6 CIMT: Carotid Intima-Media Thickness

7 CVD: Cardiovascular Disease

8 ECG: Electrocardiogram

9 eGFR: Estimated glomerular filtration rate

10 FRS: Framingham Risk Score

11 HDL: High-Density-Lipoprotein

12 IMT: Intima-Media Thickness

13 IQR: Interquartile Range

14 LDL: Low-Density-Lipoprotein

15 LVH: Left Ventricular Hypertrophy

- 1 NSA: North-Star Alliance
- 2 OR: Odds Ratio
- 3 *P*: p-value
- 4 TG: Triglycerides
- 5 THS: Trucker Health Survey
- 6 WRHI: Wits Reproductive Health and HIV Institute

For peer review only

## Appendix

## Appendix 1: Uni- and multivariable analysis

| Linear regression         | Log (FRS)                                      |          |                                                |                  |
|---------------------------|------------------------------------------------|----------|------------------------------------------------|------------------|
|                           | Univariable                                    |          | Multivariable                                  |                  |
|                           | Unstandardized $\beta$<br>coefficient (95% CI) | <i>P</i> | Unstandardized $\beta$<br>coefficient (95% CI) | <i>P</i>         |
| Day/night shift           | -0.05 (-0.12-0.01)                             | 0.13     | -0.02 (-0.06-0.02)                             | 0.18             |
| Age                       | 0.04 (0.04-0.04)                               | <0.01    | 0.04 (0.03-0.04)                               | <b>&lt;0.01</b>  |
| Country of origin         |                                                |          |                                                |                  |
| Zimbabwe                  | -0.07 (-0.14--0.00)                            | 0.04     | -0.01 (-0.07-0.04)                             | 0.68             |
| South Africa              | Reference                                      |          |                                                |                  |
| Zambia                    | -0.03 (-0.16-0.10)                             | 0.67     | 0.04 (-0.03-0.15)                              | 0.28             |
| Other                     | 0.05 (-0.06-0.16)                              | 0.38     | 0.02 (-0.06-0.08)                              | 0.48             |
| Education level           |                                                |          |                                                |                  |
| Primary school or less    | 0.13 (0.01-0.25)                               | 0.04     | -0.09 (-0.10-0.03)                             | <b>0.01</b>      |
| Secondary school          | Reference                                      |          |                                                |                  |
| Matrix/college/university | -0.02 (-0.09-0.05)                             | 0.65     | 0.01 (-0.01-0.07)                              | 0.76             |
| Stable relationship       | 0.31 (0.20-0.41)                               | <0.01    | 0.10 (-0.004-0.12)                             | <b>&lt; 0.01</b> |

| Linear regression | Log (ASCVD)                                    |          |                                                |                 |
|-------------------|------------------------------------------------|----------|------------------------------------------------|-----------------|
|                   | Univariable                                    |          | Multivariable                                  |                 |
|                   | Unstandardized $\beta$<br>coefficient (95% CI) | <i>P</i> | Unstandardized $\beta$<br>coefficient (95% CI) | <i>P</i>        |
| Day/night shift   | -0.03 (-0.08-0.02)                             | 0.28     | -0.01 (-0.03-0.02)                             | 0.49            |
| Age               | 0.03 (0.03-0.03)                               | <0.01    | 0.03 (0.03-0.03)                               | <b>&lt;0.01</b> |
| Country of origin |                                                |          |                                                |                 |
| Zimbabwe          | -0.65 (-0.12--0.01)                            | 0.02     | 0.001 (-0.03-0.03)                             | 0.97            |
| South Africa      | Reference                                      |          |                                                |                 |
| Zambia            | -0.01 (-0.11-0.09)                             | 0.82     | 0.04 (-0.01-0.09)                              | 0.13            |
| Other             | 0.04 (-0.05-0.12)                              | 0.37     | 0.01 (-0.03-0.06)                              | 0.58            |



|                           |                    |       |                     |                  |
|---------------------------|--------------------|-------|---------------------|------------------|
| Education level           |                    |       |                     |                  |
| Primary school or less    | 0.10 (0.01-0.19)   | 0.03  | -0.08 (-0.12--0.03) | <b>&lt; 0.01</b> |
| Secondary school          | Reference          |       |                     |                  |
| Matrix/college/university | -0.02 (-0.08-0.03) | 0.38  | -0.01 (-0.04-0.02)  | 0.55             |
| Stable relationship       | 0.22 (0.14-0.30)   | <0.01 | 0.06 (0.02-0.10)    | <b>&lt; 0.01</b> |

| Linear regression         | Log (mean CCA-IMT)                             |          |                                                |                 |
|---------------------------|------------------------------------------------|----------|------------------------------------------------|-----------------|
|                           | Univariable                                    |          | Multivariable                                  |                 |
|                           | Unstandardized $\beta$<br>coefficient (95% CI) | <i>P</i> | Unstandardized $\beta$<br>coefficient (95% CI) | <i>P</i>        |
| Day/night shift           | -0.01 (-0.03-0.003)                            | 0.12     | -0.003 (-0.02-0.02)                            | 0.74            |
| Age                       | 0.01 (0.004-0.01)                              | <0.01    | 0.006 (0.005-0.007)                            | <b>&lt;0.01</b> |
| Country of origin         |                                                |          |                                                |                 |
| Zimbabwe                  | -0.01 (-0.04-0.03)                             | 0.74     |                                                |                 |
| South Africa              | Reference                                      |          |                                                |                 |
| Zambia                    | -0.02 (-0.07-0.01)                             | 0.24     |                                                |                 |
| Other                     | -0.04 (-0.05-0.04)                             | 0.83     |                                                |                 |
| Education level           |                                                |          |                                                |                 |
| Primary school or less    | 0.01 (-0.01-0.04)                              | 0.29     |                                                |                 |
| Secondary school          | Reference                                      |          |                                                |                 |
| Matrix/college/university | -0.01 (-0.03-0.01)                             | 0.30     |                                                |                 |
| Stable relationship       | 0.04 (0.01-0.06)                               | < 0.01   | 0.008 (-0.02-0.04)                             | 0.61            |

| Binomial logistic regression | LVH combined     |          |                  |          |
|------------------------------|------------------|----------|------------------|----------|
|                              | Univariable OR   |          | Multivariable OR |          |
|                              | (95% CI)         | <i>P</i> | (95% CI)         | <i>P</i> |
| Day/night shift              | 0.99 (0.70-1.38) | 0.93     | 0.94 (0.67-1.33) | 0.73     |
| Age                          | 0.98 (0.96-1.00) | 0.03     | 0.99 (0.97-1.00) | 0.12     |
| Country of origin            |                  |          |                  |          |
| Zimbabwe                     | 1.34 (0.86-2.08) | 0.21     |                  |          |
| South Africa                 | Reference        |          |                  |          |

|                     |                           |                  |       |                                  |
|---------------------|---------------------------|------------------|-------|----------------------------------|
|                     | Zambia                    | 1.18 (0.55-2.51) | 0.67  |                                  |
|                     | Other                     | 1.15 (0.59-2.24) | 0.68  |                                  |
| Education level     |                           |                  |       |                                  |
|                     | Primary school or less    | 1.36 (0.73-2.52) | 0.33  |                                  |
|                     | Secondary school          | Reference        |       |                                  |
|                     | Matrix/college/university | 1.21 (0.83-1.74) | 0.32  |                                  |
| Stable relationship |                           | 0.37 (0.21-0.64) | <0.01 | 0.40 (0.23-0.70) <b>&lt;0.01</b> |

Appendix 2: Sensitivity analysis. Working 2-3 night shifts a week compared to 0-1 night shifts a week (n=228)

| Linear regression            | Log (FRS)                                      |                     |                                                |                     |                 |
|------------------------------|------------------------------------------------|---------------------|------------------------------------------------|---------------------|-----------------|
|                              | Univariable                                    |                     | Multivariable                                  |                     |                 |
|                              | Unstandardized $\beta$<br>coefficient (95% CI) | <i>P</i>            | Unstandardized $\beta$<br>coefficient (95% CI) | <i>P</i>            |                 |
| Day/night shift (2-3 nights) | -0.03 (-0.10-0.04)                             | 0.34                | -0.03 (-0.06-0.01)                             | 0.15                |                 |
| Age                          | 0.04 (0.04-0.04)                               | <0.01               | 0.04 (0.04-0.04)                               | <b>&lt;0.01</b>     |                 |
| Country of origin            |                                                |                     |                                                |                     |                 |
|                              | Zimbabwe                                       | -0.07 (-0.14--0.00) | 0.04                                           | 0.01 (-0.04-0.05)   | 0.75            |
|                              | South Africa                                   | Reference           |                                                |                     |                 |
|                              | Zambia                                         | -0.03 (-0.16-0.10)  | 0.67                                           | 0.04 (-0.04-0.11)   | 0.31            |
|                              | Other                                          | 0.05 (-0.06-0.16)   | 0.38                                           | 0.02 (-0.04-0.09)   | 0.51            |
| Education level              |                                                |                     |                                                |                     |                 |
|                              | Primary school or less                         | 0.13 (0.01-0.25)    | 0.04                                           | -0.09 (-0.15--0.02) | <b>&lt;0.01</b> |
|                              | Secondary school                               | Reference           |                                                |                     |                 |
|                              | Matrix/college/university                      | -0.02 (-0.09-0.05)  | 0.65                                           | 0.01(-0.03-0.04)    | 0.79            |
| Stable relationship          |                                                | 0.31 (0.20-0.41)    | <0.01                                          | 0.10 (0.05-0.16)    | <b>&lt;0.01</b> |

| Linear regression | Log (ASCVD)                                    |          |                                                |          |
|-------------------|------------------------------------------------|----------|------------------------------------------------|----------|
|                   | Univariable                                    |          | Multivariable                                  |          |
|                   | Unstandardized $\beta$<br>coefficient (95% CI) | <i>P</i> | Unstandardized $\beta$<br>coefficient (95% CI) | <i>P</i> |

|                              |                     |       |                    |                  |
|------------------------------|---------------------|-------|--------------------|------------------|
| Day/night shift (2-3 nights) | -0.01 (-0.07-0.04)  | 0.63  | -0.01 (-0.03-0.02) | 0.48             |
| Age                          | 0.03 (0.03-0.03)    | <0.01 | 0.03 (0.03-0.03)   | <b>&lt;0.01</b>  |
| Country of origin            |                     |       |                    |                  |
| Zimbabwe                     | -0.65 (-0.12--0.01) | 0.02  | 0.00 (-0.03-0.03)  | 0.99             |
| South Africa                 | Reference           |       |                    |                  |
| Zambia                       | -0.01 (-0.11-0.09)  | 0.82  | 0.04 (-0.01-0.09)  | 0.14             |
| Other                        | 0.04 (-0.05-0.12)   | 0.37  | 0.01 (-0.03-0.06)  | 0.59             |
| Education level              |                     |       |                    |                  |
| Primary school or less       | 0.10 (0.01-0.19)    | 0.03  | -0.08 (-0.12-0.03) | <b>&lt; 0.01</b> |
| Secondary school             | Reference           |       |                    |                  |
| Matrix/college/university    | -0.02 (-0.08-0.03)  | 0.38  | -0.01 (-0.04-0.02) | 0.53             |
| Stable relationship          | 0.22 (0.14-0.30)    | <0.01 | 0.06 (0.02-0.10)   | <b>&lt; 0.01</b> |

| Linear regression            | Log (mean CCA-IMT)                             |          |                                                |                 |
|------------------------------|------------------------------------------------|----------|------------------------------------------------|-----------------|
|                              | Univariable                                    |          | Multivariable                                  |                 |
|                              | Unstandardized $\beta$<br>coefficient (95% CI) | <i>P</i> | Unstandardized $\beta$<br>coefficient (95% CI) | <i>P</i>        |
| Day/night shift (2-3 nights) | -0.03 (-0.09-0.03)                             | 0.36     | -0.004 (-0.04-0.03)                            | 0.82            |
| Age                          | 0.01 (0.004-0.01)                              | <0.01    | 0.03 (0.03-0.03)                               | <b>&lt;0.01</b> |
| Country of origin            |                                                |          |                                                |                 |
| Zimbabwe                     | -0.01 (-0.04-0.03)                             | 0.74     |                                                |                 |
| South Africa                 | Reference                                      |          |                                                |                 |
| Zambia                       | -0.02 (-0.07-0.01)                             | 0.24     |                                                |                 |
| Other                        | -0.04 (-0.05-0.04)                             | 0.83     |                                                |                 |
| Education level              |                                                |          |                                                |                 |
| Primary school or less       | 0.01 (-0.01-0.04)                              | 0.29     |                                                |                 |
| Secondary school             | Reference                                      |          |                                                |                 |
| Matrix/college/university    | -0.01 (-0.03-0.01)                             | 0.30     |                                                |                 |
| Stable relationship          | 0.04 (0.01-0.06)                               | < 0.01   | 0.05 (-0.01-0.10)                              | 0.09            |

|                              |                     |
|------------------------------|---------------------|
| Binomial logistic regression | <b>LVH combined</b> |
|------------------------------|---------------------|

|                              | Univariable OR<br>(95% CI) | <i>P</i> | Multivariable OR<br>(95% CI) | <i>P</i>        |
|------------------------------|----------------------------|----------|------------------------------|-----------------|
| Day/night shift (2-3 nights) | 0.99 (0.68-1.45)           | 0.91     | 0.92 (0.69-1.42)             | 0.79            |
| Age                          | 0.98 (0.96-1.00)           | 0.03     | 0.98 (0.97-1.00)             | 0.11            |
| Country of origin            |                            |          |                              |                 |
| Zimbabwe                     | 1.34 (0.86-2.08)           | 0.21     |                              |                 |
| South Africa                 | Reference                  |          |                              |                 |
| Zambia                       | 1.18 (0.55-2.51)           | 0.67     |                              |                 |
| Other                        | 1.15 (0.59-2.24)           | 0.68     |                              |                 |
| Education level              |                            |          |                              |                 |
| Primary school or less       | 1.36 (0.73-2.52)           | 0.33     |                              |                 |
| Secondary school             | Reference                  |          |                              |                 |
| Matrix/college/university    | 1.21 (0.83-1.74)           | 0.32     |                              |                 |
| Stable relationship          | 0.37 (0.21-0.64)           | <0.01    | 0.45 (0.25-0.78)             | <b>&lt;0.01</b> |

Appendix 3: Sensitivity analysis. Working  $\geq 4$  night shifts a week compared to 0-1 night shifts a week (n=74)

| Linear regression                  | Log (FRS)                                      |          |                                                |                 |
|------------------------------------|------------------------------------------------|----------|------------------------------------------------|-----------------|
|                                    | Univariable                                    |          | Multivariable                                  |                 |
|                                    | Unstandardized $\beta$<br>coefficient (95% CI) | <i>P</i> | Unstandardized $\beta$<br>coefficient (95% CI) | <i>P</i>        |
| Day/night shift (4 or more nights) | -0.05 (-0.15-0.05)                             | 0.37     | 0.002 (-0.05-0.05)                             | 0.93            |
| Age                                | 0.04 (0.04-0.04)                               | <0.01    | 0.04 (0.04-0.04)                               | <b>&lt;0.01</b> |
| Country of origin                  |                                                |          |                                                |                 |
| Zimbabwe                           | -0.07 (-0.14--0.00)                            | 0.04     | 0.01 (-0.04-0.06)                              | 0.70            |
| South Africa                       | Reference                                      |          |                                                |                 |
| Zambia                             | -0.03 (-0.16-0.10)                             | 0.67     | 0.04 (-0.03-0.12)                              | 0.28            |
| Other                              | 0.05 (-0.06-0.16)                              | 0.38     | 0.02 (-0.04-0.09)                              | 0.47            |
| Education level                    |                                                |          |                                                |                 |
| Primary school or less             | 0.13 (0.01-0.25)                               | 0.04     | -0.09 (-0.15--0.02)                            | <b>&lt;0.01</b> |

|                           |                    |       |                   |                 |
|---------------------------|--------------------|-------|-------------------|-----------------|
| Secondary school          | Reference          |       |                   |                 |
| Matrix/college/university | -0.02 (-0.09-0.05) | 0.65  | 0.01 (-0.03-0.04) | 0.73            |
| Stable relationship       | 0.31 (0.20-0.41)   | <0.01 | 0.10 (0.05-0.16)  | <b>&lt;0.01</b> |

| Linear regression                  | Log (ASCVD)                                    |          |                                                |                  |
|------------------------------------|------------------------------------------------|----------|------------------------------------------------|------------------|
|                                    | Univariable                                    |          | Multivariable                                  |                  |
|                                    | Unstandardized $\beta$<br>coefficient (95% CI) | <i>P</i> | Unstandardized $\beta$<br>coefficient (95% CI) | <i>P</i>         |
| Day/night shift (4 or more nights) | -0.04 (-0.11-0.04)                             | 0.35     | 0.00 (-0.04-0.04)                              | 0.99             |
| Age                                | 0.03 (0.03-0.03)                               | <0.01    | 0.03 (0.03-0.03)                               | <b>&lt;0.01</b>  |
| Country of origin                  |                                                |          |                                                |                  |
| Zimbabwe                           | -0.65 (-0.12--0.01)                            | 0.02     | 0.00 (-0.03-0.03)                              | 0.98             |
| South Africa                       | Reference                                      |          |                                                |                  |
| Zambia                             | -0.01 (-0.11-0.09)                             | 0.82     | 0.04 (-0.01-0.09)                              | 0.13             |
| Other                              | 0.04 (-0.05-0.12)                              | 0.37     | 0.01 (-0.03-0.06)                              | 0.57             |
| Education level                    |                                                |          |                                                |                  |
| Primary school or less             | 0.10 (0.01-0.19)                               | 0.03     | -0.07 (-0.12--0.03)                            | <b>&lt; 0.01</b> |
| Secondary school                   | Reference                                      |          |                                                |                  |
| Matrix/college/university          | -0.02 (-0.08-0.03)                             | 0.38     | -0.01 (-0.03-0.02)                             | 0.56             |
| Stable relationship                | 0.22 (0.14-0.30)                               | <0.01    | 0.06 (0.02-0.10)                               | <b>&lt; 0.01</b> |

| Linear regression                  | Log (mean CCA-IMT)                             |          |                                                |                 |
|------------------------------------|------------------------------------------------|----------|------------------------------------------------|-----------------|
|                                    | Univariable                                    |          | Multivariable                                  |                 |
|                                    | Unstandardized $\beta$<br>coefficient (95% CI) | <i>P</i> | Unstandardized $\beta$<br>coefficient (95% CI) | <i>P</i>        |
| Day/night shift (4 or more nights) | -0.05 (-0.14-0.03)                             | 0.21     | -0.02 (-0.07-0.03)                             | 0.39            |
| Age                                | 0.01 (0.004-0.01)                              | <0.01    | 0.03 (0.03-0.03)                               | <b>&lt;0.01</b> |
| Country of origin                  |                                                |          |                                                |                 |
| Zimbabwe                           | -0.01 (-0.04-0.03)                             | 0.74     |                                                |                 |

|                     |                           |                    |        |                        |
|---------------------|---------------------------|--------------------|--------|------------------------|
|                     | South Africa              | Reference          |        |                        |
|                     | Zambia                    | -0.02 (-0.07-0.01) | 0.24   |                        |
|                     | Other                     | -0.04 (-0.05-0.04) | 0.83   |                        |
| Education level     |                           |                    |        |                        |
|                     | Primary school or less    | 0.01 (-0.01-0.04)  | 0.29   |                        |
|                     | Secondary school          | Reference          |        |                        |
|                     | Matrix/college/university | -0.01 (-0.03-0.01) | 0.30   |                        |
| Stable relationship |                           | 0.04 (0.01-0.06)   | < 0.01 | 0.05 (-0.01-0.10) 0.10 |

| Binomial logistic regression       | LVH combined               |                  |                              |                 |
|------------------------------------|----------------------------|------------------|------------------------------|-----------------|
|                                    | Univariable OR<br>(95% CI) | <i>P</i>         | Multivariable OR<br>(95% CI) | <i>P</i>        |
| Day/night shift (4 or more nights) | 0.99 (0.81-1.18)           | 0.95             | 0.93 (0.73-1.28)             | 0.79            |
| Age                                | 0.98 (0.96-1.00)           | 0.03             | 0.99 (0.98-1.00)             | 0.10            |
| Country of origin                  |                            |                  |                              |                 |
|                                    | Zimbabwe                   | 1.34 (0.86-2.08) | 0.21                         |                 |
|                                    | South Africa               | Reference        |                              |                 |
|                                    | Zambia                     | 1.18 (0.55-2.51) | 0.67                         |                 |
|                                    | Other                      | 1.15 (0.59-2.24) | 0.68                         |                 |
| Education level                    |                            |                  |                              |                 |
|                                    | Primary school or less     | 1.36 (0.73-2.52) | 0.33                         |                 |
|                                    | Secondary school           | Reference        |                              |                 |
|                                    | Matrix/college/university  | 1.21 (0.83-1.74) | 0.32                         |                 |
| Stable relationship                | 0.37 (0.21-0.64)           | <0.01            | 0.41 (0.28-0.65)             | <b>&lt;0.01</b> |

Appendix 4: Sensitivity analysis. Including only truck drivers working more than 10 years as a truck driver (n=229)

| Linear regression | Log (FRS)                                                     |          |                                                                 |          |
|-------------------|---------------------------------------------------------------|----------|-----------------------------------------------------------------|----------|
|                   | Univariable<br>Unstandardized $\beta$<br>coefficient (95% CI) | <i>P</i> | Multivariable<br>Unstandardized $\beta$<br>coefficient (95% CI) | <i>P</i> |
|                   |                                                               |          |                                                                 |          |

|                           |                     |       |                   |                 |
|---------------------------|---------------------|-------|-------------------|-----------------|
| Day/night shift           | 0.12 (-0.08-0.33)   | 0.24  | 0.06 (-0.06-0.19) | 0.32            |
| Age                       | 0.08 (0.07- 0.09)   | <0.01 | 0.08 (0.07-0.08)  | <b>&lt;0.01</b> |
| Country of origin         |                     |       |                   |                 |
| Zimbabwe                  | -0.42 (-0.69--0.16) | 0.36  |                   |                 |
| South Africa              | Reference           |       |                   |                 |
| Zambia                    | -0.12 (-0.54-0.31)  | 0.59  |                   |                 |
| Other                     | 0.15 (-0.51-0.21)   | 0.41  |                   |                 |
| Education level           |                     |       |                   |                 |
| Primary school or less    | 0.17 (-0.14-0.47)   | 0.28  |                   |                 |
| Secondary school          | Reference           |       |                   |                 |
| Matrix/college/university | 0.18 (-0.05-0.42)   | 0.24  |                   |                 |
| Stable relationship       | 0.59 (0.16-0.1.02)  | 0.07  | 0.27 (0.01-0.54)  | <b>0.04</b>     |

| Linear regression         | Log (ASCVD)                                    |          |                                                |                  |
|---------------------------|------------------------------------------------|----------|------------------------------------------------|------------------|
|                           | Univariable                                    |          | Multivariable                                  |                  |
|                           | Unstandardized $\beta$<br>coefficient (95% CI) | <i>P</i> | Unstandardized $\beta$<br>coefficient (95% CI) | <i>P</i>         |
| Day/night shift           | 0.04 (-0.03-0.11)                              | 0.27     | 0.02 (-0.02-0.06)                              | 0.38             |
| Age                       | 0.03 (0.03-0.03)                               | <0.01    | 0.03 (0.02-0.03)                               | <b>&lt; 0.01</b> |
| Country of origin         |                                                |          |                                                |                  |
| Zimbabwe                  | -0.03 (-0.12--0.01)                            | 0.26     |                                                |                  |
| South Africa              | Reference                                      |          |                                                |                  |
| Zambia                    | -0.01 (-0.15-0.12)                             | 0.75     |                                                |                  |
| Other                     | 0.03 (-0.04-0.14)                              | 0.37     |                                                |                  |
| Education level           |                                                |          |                                                |                  |
| Primary school or less    | 0.08 (0.01-0.11)                               | 0.56     |                                                |                  |
| Secondary school          | Reference                                      |          |                                                |                  |
| Matrix/college/university | -0.03 (-0.07-0.04)                             | 0.34     |                                                |                  |
| Stable relationship       | 0.28 (0.19-0.33)                               | <0.01    | 0.07 (-0.01-0.15)                              | 0.08             |

|                   |                           |
|-------------------|---------------------------|
| Linear regression | <b>Log (mean CCA-IMT)</b> |
|-------------------|---------------------------|

|                           | Univariable                                    |          | Multivariable                                  |                 |
|---------------------------|------------------------------------------------|----------|------------------------------------------------|-----------------|
|                           | Unstandardized $\beta$<br>coefficient (95% CI) | <i>P</i> | Unstandardized $\beta$<br>coefficient (95% CI) | <i>P</i>        |
| Day/night shift           | -0.01 (-0.01-0.003)                            | 0.15     | -0.03 (-0.08-0.001)                            | 0.05            |
| Age                       | 0.01 (0.005-0.01)                              | <0.01    | 0.008 (0.005-0.01)                             | <b>&lt;0.01</b> |
| Country of origin         |                                                |          |                                                |                 |
| Zimbabwe                  | -0.02 (-0.05-0.04)                             | 0.72     |                                                |                 |
| South Africa              | Reference                                      |          |                                                |                 |
| Zambia                    | -0.03 (-0.08-0.02)                             | 0.35     |                                                |                 |
| Other                     | -0.05 (-0.06-0.05)                             | 0.77     |                                                |                 |
| Education level           |                                                |          |                                                |                 |
| Primary school or less    | 0.01 (-0.01-0.05)                              | 0.28     |                                                |                 |
| Secondary school          | Reference                                      |          |                                                |                 |
| Matrix/college/university | -0.01 (-0.04-0.01)                             | 0.38     |                                                |                 |
| Stable relationship       | 0.04 (0.01-0.05)                               | < 0.01   | 0.018 (-0.1-0.13)                              | 0.75            |

| Binomial logistic regression | LVH combined               |          |                              |                 |
|------------------------------|----------------------------|----------|------------------------------|-----------------|
|                              | Univariable OR<br>(95% CI) | <i>P</i> | Multivariable OR<br>(95% CI) | <i>P</i>        |
| Day/night shift              | 0.98 (0.73-1.45)           | 0.91     | 0.92 (0.65-1.31)             | 0.78            |
| Age                          | 0.99 (0.97-1.00)           | 0.04     | 0.99 (0.96-1.00)             | 0.08            |
| Country of origin            |                            |          |                              |                 |
| Zimbabwe                     | 1.62 (0.96-2.25)           | 0.25     |                              |                 |
| South Africa                 | Reference                  |          |                              |                 |
| Zambia                       | 1.21 (0.53-2.66)           | 0.75     |                              |                 |
| Other                        | 1.12 (0.54-2.22)           | 0.58     |                              |                 |
| Education level              |                            |          |                              |                 |
| Primary school or less       | 1.36 (0.73-2.52)           | 0.33     |                              |                 |
| Secondary school             | Reference                  |          |                              |                 |
| Matrix/college/university    | 1.21 (0.83-1.74)           | 0.32     |                              |                 |
| Stable relationship          | 0.34 (0.23-0.69)           | <0.01    | 0.51 (0.33-0.84)             | <b>&lt;0.01</b> |



1  
2  
3  
4  
5  
6  
7  
8  
9  
10  
11  
12  
13  
14  
15  
16  
17  
18  
19  
20  
21  
22  
23  
24  
25  
26  
27  
28  
29  
30  
31  
32  
33  
34  
35  
36  
37  
38  
39  
40  
41  
42  
43  
44  
45  
46  
47  
48  
49  
50  
51  
52  
53  
54  
55  
56  
57  
58  
59  
60

For peer review only

# Reporting checklist for cross sectional study.

Based on the STROBE cross sectional guidelines.

## Instructions to authors

Complete this checklist by entering the page numbers from your manuscript where readers will find each of the items listed below.

Your article may not currently address all the items on the checklist. Please modify your text to include the missing information. If you are certain that an item does not apply, please write "n/a" and provide a short explanation.

Upload your completed checklist as an extra file when you submit to a journal.

|                           |                     |                                                                                                 | Page   |
|---------------------------|---------------------|-------------------------------------------------------------------------------------------------|--------|
|                           | Reporting Item      |                                                                                                 | Number |
| <b>Title and abstract</b> |                     |                                                                                                 |        |
| Title                     | <a href="#">#1a</a> | Indicate the study's design with a commonly used term in the title or the abstract              | 1      |
| Abstract                  | <a href="#">#1b</a> | Provide in the abstract an informative and balanced summary of what was done and what was found | 3      |
| <b>Introduction</b>       |                     |                                                                                                 |        |
| Background / rationale    | <a href="#">#2</a>  | Explain the scientific background and rationale for the investigation being reported            | 5      |

|    |                      |                     |                                                                                                                                                                                                                                                                      |     |
|----|----------------------|---------------------|----------------------------------------------------------------------------------------------------------------------------------------------------------------------------------------------------------------------------------------------------------------------|-----|
| 1  | Objectives           | <a href="#">#3</a>  | State specific objectives, including any prespecified hypotheses                                                                                                                                                                                                     | 5   |
| 2  |                      |                     |                                                                                                                                                                                                                                                                      |     |
| 3  |                      |                     |                                                                                                                                                                                                                                                                      |     |
| 4  |                      |                     |                                                                                                                                                                                                                                                                      |     |
| 5  |                      |                     |                                                                                                                                                                                                                                                                      |     |
| 6  | <b>Methods</b>       |                     |                                                                                                                                                                                                                                                                      |     |
| 7  |                      |                     |                                                                                                                                                                                                                                                                      |     |
| 8  |                      |                     |                                                                                                                                                                                                                                                                      |     |
| 9  |                      |                     |                                                                                                                                                                                                                                                                      |     |
| 10 | Study design         | <a href="#">#4</a>  | Present key elements of study design early in the paper                                                                                                                                                                                                              | 6   |
| 11 |                      |                     |                                                                                                                                                                                                                                                                      |     |
| 12 |                      |                     |                                                                                                                                                                                                                                                                      |     |
| 13 | Setting              | <a href="#">#5</a>  | Describe the setting, locations, and relevant dates, including periods of recruitment, exposure, follow-up, and data collection                                                                                                                                      | 6   |
| 14 |                      |                     |                                                                                                                                                                                                                                                                      |     |
| 15 |                      |                     |                                                                                                                                                                                                                                                                      |     |
| 16 |                      |                     |                                                                                                                                                                                                                                                                      |     |
| 17 |                      |                     |                                                                                                                                                                                                                                                                      |     |
| 18 |                      |                     |                                                                                                                                                                                                                                                                      |     |
| 19 |                      |                     |                                                                                                                                                                                                                                                                      |     |
| 20 | Eligibility criteria | <a href="#">#6a</a> | Give the eligibility criteria, and the sources and methods of selection of participants.                                                                                                                                                                             | 6   |
| 21 |                      |                     |                                                                                                                                                                                                                                                                      |     |
| 22 |                      |                     |                                                                                                                                                                                                                                                                      |     |
| 23 |                      |                     |                                                                                                                                                                                                                                                                      |     |
| 24 |                      |                     |                                                                                                                                                                                                                                                                      |     |
| 25 |                      |                     |                                                                                                                                                                                                                                                                      |     |
| 26 |                      | <a href="#">#7</a>  | Clearly define all outcomes, exposures, predictors, potential confounders, and effect modifiers. Give diagnostic criteria, if applicable                                                                                                                             | 7   |
| 27 |                      |                     |                                                                                                                                                                                                                                                                      |     |
| 28 |                      |                     |                                                                                                                                                                                                                                                                      |     |
| 29 |                      |                     |                                                                                                                                                                                                                                                                      |     |
| 30 |                      |                     |                                                                                                                                                                                                                                                                      |     |
| 31 |                      |                     |                                                                                                                                                                                                                                                                      |     |
| 32 |                      |                     |                                                                                                                                                                                                                                                                      |     |
| 33 | Data sources /       | <a href="#">#8</a>  | For each variable of interest give sources of data and details of methods of assessment (measurement). Describe comparability of assessment methods if there is more than one group. Give information separately for for exposed and unexposed groups if applicable. | 7   |
| 34 | measurement          |                     |                                                                                                                                                                                                                                                                      |     |
| 35 |                      |                     |                                                                                                                                                                                                                                                                      |     |
| 36 |                      |                     |                                                                                                                                                                                                                                                                      |     |
| 37 |                      |                     |                                                                                                                                                                                                                                                                      |     |
| 38 |                      |                     |                                                                                                                                                                                                                                                                      |     |
| 39 |                      |                     |                                                                                                                                                                                                                                                                      |     |
| 40 |                      |                     |                                                                                                                                                                                                                                                                      |     |
| 41 |                      |                     |                                                                                                                                                                                                                                                                      |     |
| 42 |                      |                     |                                                                                                                                                                                                                                                                      |     |
| 43 |                      |                     |                                                                                                                                                                                                                                                                      |     |
| 44 |                      |                     |                                                                                                                                                                                                                                                                      |     |
| 45 | Bias                 | <a href="#">#9</a>  | Describe any efforts to address potential sources of bias                                                                                                                                                                                                            | 8   |
| 46 |                      |                     |                                                                                                                                                                                                                                                                      |     |
| 47 |                      |                     |                                                                                                                                                                                                                                                                      |     |
| 48 |                      |                     |                                                                                                                                                                                                                                                                      |     |
| 49 | Study size           | <a href="#">#10</a> | Explain how the study size was arrived at                                                                                                                                                                                                                            | 6   |
| 50 |                      |                     |                                                                                                                                                                                                                                                                      |     |
| 51 |                      |                     |                                                                                                                                                                                                                                                                      |     |
| 52 | Quantitative         | <a href="#">#11</a> | Explain how quantitative variables were handled in the analyses. If applicable, describe which groupings were chosen, and why                                                                                                                                        | 8/9 |
| 53 | variables            |                     |                                                                                                                                                                                                                                                                      |     |
| 54 |                      |                     |                                                                                                                                                                                                                                                                      |     |
| 55 |                      |                     |                                                                                                                                                                                                                                                                      |     |
| 56 |                      |                     |                                                                                                                                                                                                                                                                      |     |
| 57 |                      |                     |                                                                                                                                                                                                                                                                      |     |
| 58 |                      |                     |                                                                                                                                                                                                                                                                      |     |
| 59 |                      |                     |                                                                                                                                                                                                                                                                      |     |
| 60 |                      |                     |                                                                                                                                                                                                                                                                      |     |

|    |                  |                      |                                                               |     |
|----|------------------|----------------------|---------------------------------------------------------------|-----|
| 1  | Statistical      | <a href="#">#12a</a> | Describe all statistical methods, including those used to     | 9   |
| 2  |                  |                      |                                                               |     |
| 3  | methods          |                      | control for confounding                                       |     |
| 4  |                  |                      |                                                               |     |
| 5  |                  |                      |                                                               |     |
| 6  | Statistical      | <a href="#">#12b</a> | Describe any methods used to examine subgroups and            | 8/9 |
| 7  |                  |                      |                                                               |     |
| 8  | methods          |                      | interactions                                                  |     |
| 9  |                  |                      |                                                               |     |
| 10 |                  |                      |                                                               |     |
| 11 |                  |                      |                                                               |     |
| 12 | Statistical      | <a href="#">#12c</a> | Explain how missing data were addressed                       | 8   |
| 13 |                  |                      |                                                               |     |
| 14 | methods          |                      |                                                               |     |
| 15 |                  |                      |                                                               |     |
| 16 |                  |                      |                                                               |     |
| 17 | Statistical      | <a href="#">#12d</a> | If applicable, describe analytical methods taking account of  | -   |
| 18 |                  |                      |                                                               |     |
| 19 | methods          |                      | sampling strategy                                             |     |
| 20 |                  |                      |                                                               |     |
| 21 |                  |                      |                                                               |     |
| 22 |                  |                      |                                                               |     |
| 23 | Statistical      | <a href="#">#12e</a> | Describe any sensitivity analyses                             | 9   |
| 24 |                  |                      |                                                               |     |
| 25 | methods          |                      |                                                               |     |
| 26 |                  |                      |                                                               |     |
| 27 |                  |                      |                                                               |     |
| 28 | <b>Results</b>   |                      |                                                               |     |
| 29 |                  |                      |                                                               |     |
| 30 |                  |                      |                                                               |     |
| 31 | Participants     | <a href="#">#13a</a> | Report numbers of individuals at each stage of study—eg       | 9   |
| 32 |                  |                      |                                                               |     |
| 33 |                  |                      | numbers potentially eligible, examined for eligibility,       |     |
| 34 |                  |                      |                                                               |     |
| 35 |                  |                      | confirmed eligible, included in the study, completing follow- |     |
| 36 |                  |                      |                                                               |     |
| 37 |                  |                      | up, and analysed. Give information separately for for         |     |
| 38 |                  |                      |                                                               |     |
| 39 |                  |                      | exposed and unexposed groups if applicable.                   |     |
| 40 |                  |                      |                                                               |     |
| 41 |                  |                      |                                                               |     |
| 42 |                  |                      |                                                               |     |
| 43 | Participants     | <a href="#">#13b</a> | Give reasons for non-participation at each stage              | 10  |
| 44 |                  |                      |                                                               |     |
| 45 |                  |                      |                                                               |     |
| 46 | Participants     | <a href="#">#13c</a> | Consider use of a flow diagram                                | -   |
| 47 |                  |                      |                                                               |     |
| 48 |                  |                      |                                                               |     |
| 49 | Descriptive data | <a href="#">#14a</a> | Give characteristics of study participants (eg demographic,   | 11  |
| 50 |                  |                      |                                                               |     |
| 51 |                  |                      | clinical, social) and information on exposures and potential  |     |
| 52 |                  |                      |                                                               |     |
| 53 |                  |                      | confounders. Give information separately for exposed and      |     |
| 54 |                  |                      |                                                               |     |
| 55 |                  |                      | unexposed groups if applicable.                               |     |
| 56 |                  |                      |                                                               |     |
| 57 |                  |                      |                                                               |     |
| 58 |                  |                      |                                                               |     |
| 59 |                  |                      |                                                               |     |
| 60 |                  |                      |                                                               |     |

|    |                   |                      |                                                                   |          |
|----|-------------------|----------------------|-------------------------------------------------------------------|----------|
| 1  | Descriptive data  | <a href="#">#14b</a> | Indicate number of participants with missing data for each        | 11       |
| 2  |                   |                      | variable of interest                                              |          |
| 3  |                   |                      |                                                                   |          |
| 4  |                   |                      |                                                                   |          |
| 5  |                   |                      |                                                                   |          |
| 6  | Outcome data      | <a href="#">#15</a>  | Report numbers of outcome events or summary measures.             | 11/12    |
| 7  |                   |                      | Give information separately for exposed and unexposed             |          |
| 8  |                   |                      | groups if applicable.                                             |          |
| 9  |                   |                      |                                                                   |          |
| 10 |                   |                      |                                                                   |          |
| 11 |                   |                      |                                                                   |          |
| 12 |                   |                      |                                                                   |          |
| 13 |                   |                      |                                                                   |          |
| 14 | Main results      | <a href="#">#16a</a> | Give unadjusted estimates and, if applicable, confounder-         | 11/12    |
| 15 |                   |                      | adjusted estimates and their precision (eg, 95% confidence        |          |
| 16 |                   |                      | interval). Make clear which confounders were adjusted for         |          |
| 17 |                   |                      | and why they were included                                        |          |
| 18 |                   |                      |                                                                   |          |
| 19 |                   |                      |                                                                   |          |
| 20 |                   |                      |                                                                   |          |
| 21 |                   |                      |                                                                   |          |
| 22 |                   |                      |                                                                   |          |
| 23 |                   |                      |                                                                   |          |
| 24 | Main results      | <a href="#">#16b</a> | Report category boundaries when continuous variables were         | 10/11/12 |
| 25 |                   |                      | categorized                                                       |          |
| 26 |                   |                      |                                                                   |          |
| 27 |                   |                      |                                                                   |          |
| 28 |                   |                      |                                                                   |          |
| 29 | Main results      | <a href="#">#16c</a> | If relevant, consider translating estimates of relative risk into | -        |
| 30 |                   |                      | absolute risk for a meaningful time period                        |          |
| 31 |                   |                      |                                                                   |          |
| 32 |                   |                      |                                                                   |          |
| 33 |                   |                      |                                                                   |          |
| 34 |                   |                      |                                                                   |          |
| 35 | Other analyses    | <a href="#">#17</a>  | Report other analyses done—e.g., analyses of subgroups            | 13       |
| 36 |                   |                      | and interactions, and sensitivity analyses                        |          |
| 37 |                   |                      |                                                                   |          |
| 38 |                   |                      |                                                                   |          |
| 39 |                   |                      |                                                                   |          |
| 40 | <b>Discussion</b> |                      |                                                                   |          |
| 41 |                   |                      |                                                                   |          |
| 42 |                   |                      |                                                                   |          |
| 43 | Key results       | <a href="#">#18</a>  | Summarise key results with reference to study objectives          | 13       |
| 44 |                   |                      |                                                                   |          |
| 45 |                   |                      |                                                                   |          |
| 46 | Limitations       | <a href="#">#19</a>  | Discuss limitations of the study, taking into account sources     | 14       |
| 47 |                   |                      | of potential bias or imprecision. Discuss both direction and      |          |
| 48 |                   |                      | magnitude of any potential bias.                                  |          |
| 49 |                   |                      |                                                                   |          |
| 50 |                   |                      |                                                                   |          |
| 51 |                   |                      |                                                                   |          |
| 52 |                   |                      |                                                                   |          |
| 53 |                   |                      |                                                                   |          |
| 54 |                   |                      |                                                                   |          |
| 55 |                   |                      |                                                                   |          |
| 56 |                   |                      |                                                                   |          |
| 57 |                   |                      |                                                                   |          |
| 58 |                   |                      |                                                                   |          |
| 59 |                   |                      |                                                                   |          |
| 60 |                   |                      |                                                                   |          |

1 Interpretation [#20](#) Give a cautious overall interpretation considering objectives, 13/14  
2  
3 limitations, multiplicity of analyses, results from similar  
4  
5 studies, and other relevant evidence.  
6  
7

8  
9 Generalisability [#21](#) Discuss the generalisability (external validity) of the study 14  
10  
11 results  
12  
13

## 14 Other Information

15  
16  
17 Funding [#22](#) Give the source of funding and the role of the funders for the 15  
18  
19 present study and, if applicable, for the original study on  
20  
21 which the present article is based  
22  
23  
24

25 None The STROBE checklist is distributed under the terms of the Creative Commons Attribution  
26  
27 License CC-BY. This checklist can be completed online using <https://www.goodreports.org/>, a tool  
28  
29 made by the [EQUATOR Network](#) in collaboration with [Penelope.ai](#)  
30  
31  
32  
33  
34  
35  
36  
37  
38  
39  
40  
41  
42  
43  
44  
45  
46  
47  
48  
49  
50  
51  
52  
53  
54  
55  
56  
57  
58  
59  
60
