# Supplementary material for: Influence of shift work on cardiovascular disease risk in Southern African long-distance truck drivers: a cross-sectional study
Source: HighWire-hosted journal article supplement (doi:10.1136/bmjopen-2021-050645), 2022-04-01
Supplement: bmjopen-2021-050645supp001_data_supplement.pdf [file bmjopen-2021-050645supp001_data_supplement.pdf]

## Appendix

## Appendix 1: Uni- and multivariable analysis

| Linear regression         | Log (FRS)                                      |          |                                                |                  |
|---------------------------|------------------------------------------------|----------|------------------------------------------------|------------------|
|                           | Univariable                                    |          | Multivariable                                  |                  |
|                           | Unstandardized $\beta$<br>coefficient (95% CI) | <i>P</i> | Unstandardized $\beta$<br>coefficient (95% CI) | <i>P</i>         |
| Day/night shift           | -0.05 (-0.12-0.01)                             | 0.13     | -0.02 (-0.06-0.02)                             | 0.18             |
| Age                       | 0.04 (0.04-0.04)                               | <0.01    | 0.04 (0.03-0.04)                               | <b>&lt;0.01</b>  |
| Country of origin         |                                                |          |                                                |                  |
| Zimbabwe                  | -0.07 (-0.14--0.00)                            | 0.04     | -0.01 (-0.07-0.04)                             | 0.68             |
| South Africa              | Reference                                      |          |                                                |                  |
| Zambia                    | -0.03 (-0.16-0.10)                             | 0.67     | 0.04 (-0.03-0.15)                              | 0.28             |
| Other                     | 0.05 (-0.06-0.16)                              | 0.38     | 0.02 (-0.06-0.08)                              | 0.48             |
| Education level           |                                                |          |                                                |                  |
| Primary school or less    | 0.13 (0.01-0.25)                               | 0.04     | -0.09 (-0.10-0.03)                             | <b>0.01</b>      |
| Secondary school          | Reference                                      |          |                                                |                  |
| Matrix/college/university | -0.02 (-0.09-0.05)                             | 0.65     | 0.01 (-0.01-0.07)                              | 0.76             |
| Stable relationship       | 0.31 (0.20-0.41)                               | <0.01    | 0.10 (-0.004-0.12)                             | <b>&lt; 0.01</b> |

| Linear regression | Log (ASCVD)                                    |          |                                                |                 |
|-------------------|------------------------------------------------|----------|------------------------------------------------|-----------------|
|                   | Univariable                                    |          | Multivariable                                  |                 |
|                   | Unstandardized $\beta$<br>coefficient (95% CI) | <i>P</i> | Unstandardized $\beta$<br>coefficient (95% CI) | <i>P</i>        |
| Day/night shift   | -0.03 (-0.08-0.02)                             | 0.28     | -0.01 (-0.03-0.02)                             | 0.49            |
| Age               | 0.03 (0.03-0.03)                               | <0.01    | 0.03 (0.03-0.03)                               | <b>&lt;0.01</b> |
| Country of origin |                                                |          |                                                |                 |
| Zimbabwe          | -0.65 (-0.12--0.01)                            | 0.02     | 0.001 (-0.03-0.03)                             | 0.97            |
| South Africa      | Reference                                      |          |                                                |                 |
| Zambia            | -0.01 (-0.11-0.09)                             | 0.82     | 0.04 (-0.01-0.09)                              | 0.13            |
| Other             | 0.04 (-0.05-0.12)                              | 0.37     | 0.01 (-0.03-0.06)                              | 0.58            |

|                           |                    |       |                     |                  |
|---------------------------|--------------------|-------|---------------------|------------------|
| Education level           |                    |       |                     |                  |
| Primary school or less    | 0.10 (0.01-0.19)   | 0.03  | -0.08 (-0.12--0.03) | <b>&lt; 0.01</b> |
| Secondary school          | Reference          |       |                     |                  |
| Matrix/college/university | -0.02 (-0.08-0.03) | 0.38  | -0.01 (-0.04-0.02)  | 0.55             |
| Stable relationship       | 0.22 (0.14-0.30)   | <0.01 | 0.06 (0.02-0.10)    | <b>&lt; 0.01</b> |

| Linear regression         | Log (mean CCA-IMT)                             |          |                                                |                 |
|---------------------------|------------------------------------------------|----------|------------------------------------------------|-----------------|
|                           | Univariable                                    |          | Multivariable                                  |                 |
|                           | Unstandardized $\beta$<br>coefficient (95% CI) | <i>P</i> | Unstandardized $\beta$<br>coefficient (95% CI) | <i>P</i>        |
| Day/night shift           | -0.01 (-0.03-0.003)                            | 0.12     | -0.003 (-0.02-0.02)                            | 0.74            |
| Age                       | 0.01 (0.004-0.01)                              | <0.01    | 0.006 (0.005-0.007)                            | <b>&lt;0.01</b> |
| Country of origin         |                                                |          |                                                |                 |
| Zimbabwe                  | -0.01 (-0.04-0.03)                             | 0.74     |                                                |                 |
| South Africa              | Reference                                      |          |                                                |                 |
| Zambia                    | -0.02 (-0.07-0.01)                             | 0.24     |                                                |                 |
| Other                     | -0.04 (-0.05-0.04)                             | 0.83     |                                                |                 |
| Education level           |                                                |          |                                                |                 |
| Primary school or less    | 0.01 (-0.01-0.04)                              | 0.29     |                                                |                 |
| Secondary school          | Reference                                      |          |                                                |                 |
| Matrix/college/university | -0.01 (-0.03-0.01)                             | 0.30     |                                                |                 |
| Stable relationship       | 0.04 (0.01-0.06)                               | < 0.01   | 0.008 (-0.02-0.04)                             | 0.61            |

| Binomial logistic regression | LVH combined               |          |                              |          |
|------------------------------|----------------------------|----------|------------------------------|----------|
|                              | Univariable OR<br>(95% CI) | <i>P</i> | Multivariable OR<br>(95% CI) | <i>P</i> |
| Day/night shift              | 0.99 (0.70-1.38)           | 0.93     | 0.94 (0.67-1.33)             | 0.73     |
| Age                          | 0.98 (0.96-1.00)           | 0.03     | 0.99 (0.97-1.00)             | 0.12     |
| Country of origin            |                            |          |                              |          |
| Zimbabwe                     | 1.34 (0.86-2.08)           | 0.21     |                              |          |
| South Africa                 | Reference                  |          |                              |          |

|                     |                           |                  |       |                                  |
|---------------------|---------------------------|------------------|-------|----------------------------------|
|                     | Zambia                    | 1.18 (0.55-2.51) | 0.67  |                                  |
|                     | Other                     | 1.15 (0.59-2.24) | 0.68  |                                  |
| Education level     |                           |                  |       |                                  |
|                     | Primary school or less    | 1.36 (0.73-2.52) | 0.33  |                                  |
|                     | Secondary school          | Reference        |       |                                  |
|                     | Matrix/college/university | 1.21 (0.83-1.74) | 0.32  |                                  |
| Stable relationship |                           | 0.37 (0.21-0.64) | <0.01 | 0.40 (0.23-0.70) <b>&lt;0.01</b> |

Appendix 2: Sensitivity analysis. Working 2-3 night shifts a week compared to 0-1 night shifts a week (n=228)

| Linear regression            | Log (FRS)                                      |                     |                                                |                     |                 |
|------------------------------|------------------------------------------------|---------------------|------------------------------------------------|---------------------|-----------------|
|                              | Univariable                                    |                     | Multivariable                                  |                     |                 |
|                              | Unstandardized $\beta$<br>coefficient (95% CI) | <i>P</i>            | Unstandardized $\beta$<br>coefficient (95% CI) | <i>P</i>            |                 |
| Day/night shift (2-3 nights) | -0.03 (-0.10-0.04)                             | 0.34                | -0.03 (-0.06-0.01)                             | 0.15                |                 |
| Age                          | 0.04 (0.04-0.04)                               | <0.01               | 0.04 (0.04-0.04)                               | <b>&lt;0.01</b>     |                 |
| Country of origin            |                                                |                     |                                                |                     |                 |
|                              | Zimbabwe                                       | -0.07 (-0.14--0.00) | 0.04                                           | 0.01 (-0.04-0.05)   | 0.75            |
|                              | South Africa                                   | Reference           |                                                |                     |                 |
|                              | Zambia                                         | -0.03 (-0.16-0.10)  | 0.67                                           | 0.04 (-0.04-0.11)   | 0.31            |
|                              | Other                                          | 0.05 (-0.06-0.16)   | 0.38                                           | 0.02 (-0.04-0.09)   | 0.51            |
| Education level              |                                                |                     |                                                |                     |                 |
|                              | Primary school or less                         | 0.13 (0.01-0.25)    | 0.04                                           | -0.09 (-0.15--0.02) | <b>&lt;0.01</b> |
|                              | Secondary school                               | Reference           |                                                |                     |                 |
|                              | Matrix/college/university                      | -0.02 (-0.09-0.05)  | 0.65                                           | 0.01(-0.03-0.04)    | 0.79            |
| Stable relationship          |                                                | 0.31 (0.20-0.41)    | <0.01                                          | 0.10 (0.05-0.16)    | <b>&lt;0.01</b> |

| Linear regression | Log (ASCVD)                                    |          |                                                |          |
|-------------------|------------------------------------------------|----------|------------------------------------------------|----------|
|                   | Univariable                                    |          | Multivariable                                  |          |
|                   | Unstandardized $\beta$<br>coefficient (95% CI) | <i>P</i> | Unstandardized $\beta$<br>coefficient (95% CI) | <i>P</i> |

|                              |                     |       |                    |                  |
|------------------------------|---------------------|-------|--------------------|------------------|
| Day/night shift (2-3 nights) | -0.01 (-0.07-0.04)  | 0.63  | -0.01 (-0.03-0.02) | 0.48             |
| Age                          | 0.03 (0.03-0.03)    | <0.01 | 0.03 (0.03-0.03)   | <b>&lt;0.01</b>  |
| Country of origin            |                     |       |                    |                  |
| Zimbabwe                     | -0.65 (-0.12--0.01) | 0.02  | 0.00 (-0.03-0.03)  | 0.99             |
| South Africa                 | Reference           |       |                    |                  |
| Zambia                       | -0.01 (-0.11-0.09)  | 0.82  | 0.04 (-0.01-0.09)  | 0.14             |
| Other                        | 0.04 (-0.05-0.12)   | 0.37  | 0.01 (-0.03-0.06)  | 0.59             |
| Education level              |                     |       |                    |                  |
| Primary school or less       | 0.10 (0.01-0.19)    | 0.03  | -0.08 (-0.12-0.03) | <b>&lt; 0.01</b> |
| Secondary school             | Reference           |       |                    |                  |
| Matrix/college/university    | -0.02 (-0.08-0.03)  | 0.38  | -0.01 (-0.04-0.02) | 0.53             |
| Stable relationship          | 0.22 (0.14-0.30)    | <0.01 | 0.06 (0.02-0.10)   | <b>&lt; 0.01</b> |

| Linear regression            | Log (mean CCA-IMT)                             |          |                                                |                 |
|------------------------------|------------------------------------------------|----------|------------------------------------------------|-----------------|
|                              | Univariable                                    |          | Multivariable                                  |                 |
|                              | Unstandardized $\beta$<br>coefficient (95% CI) | <i>P</i> | Unstandardized $\beta$<br>coefficient (95% CI) | <i>P</i>        |
| Day/night shift (2-3 nights) | -0.03 (-0.09-0.03)                             | 0.36     | -0.004 (-0.04-0.03)                            | 0.82            |
| Age                          | 0.01 (0.004-0.01)                              | <0.01    | 0.03 (0.03-0.03)                               | <b>&lt;0.01</b> |
| Country of origin            |                                                |          |                                                |                 |
| Zimbabwe                     | -0.01 (-0.04-0.03)                             | 0.74     |                                                |                 |
| South Africa                 | Reference                                      |          |                                                |                 |
| Zambia                       | -0.02 (-0.07-0.01)                             | 0.24     |                                                |                 |
| Other                        | -0.04 (-0.05-0.04)                             | 0.83     |                                                |                 |
| Education level              |                                                |          |                                                |                 |
| Primary school or less       | 0.01 (-0.01-0.04)                              | 0.29     |                                                |                 |
| Secondary school             | Reference                                      |          |                                                |                 |
| Matrix/college/university    | -0.01 (-0.03-0.01)                             | 0.30     |                                                |                 |
| Stable relationship          | 0.04 (0.01-0.06)                               | < 0.01   | 0.05 (-0.01-0.10)                              | 0.09            |

|                              |                     |
|------------------------------|---------------------|
| Binomial logistic regression | <b>LVH combined</b> |
|------------------------------|---------------------|

|                              | Univariable OR<br>(95% CI) | P     | Multivariable OR<br>(95% CI) | P               |
|------------------------------|----------------------------|-------|------------------------------|-----------------|
| Day/night shift (2-3 nights) | 0.99 (0.68-1.45)           | 0.91  | 0.92 (0.69-1.42)             | 0.79            |
| Age                          | 0.98 (0.96-1.00)           | 0.03  | 0.98 (0.97-1.00)             | 0.11            |
| Country of origin            |                            |       |                              |                 |
| Zimbabwe                     | 1.34 (0.86-2.08)           | 0.21  |                              |                 |
| South Africa                 | Reference                  |       |                              |                 |
| Zambia                       | 1.18 (0.55-2.51)           | 0.67  |                              |                 |
| Other                        | 1.15 (0.59-2.24)           | 0.68  |                              |                 |
| Education level              |                            |       |                              |                 |
| Primary school or less       | 1.36 (0.73-2.52)           | 0.33  |                              |                 |
| Secondary school             | Reference                  |       |                              |                 |
| Matrix/college/university    | 1.21 (0.83-1.74)           | 0.32  |                              |                 |
| Stable relationship          | 0.37 (0.21-0.64)           | <0.01 | 0.45 (0.25-0.78)             | <b>&lt;0.01</b> |

Appendix 3: Sensitivity analysis. Working  $\geq 4$  night shifts a week compared to 0-1 night shifts a week (n=74)

| Linear regression                  | Log (FRS)                                                     |       |                                                                 |                 |
|------------------------------------|---------------------------------------------------------------|-------|-----------------------------------------------------------------|-----------------|
|                                    | Univariable<br>Unstandardized $\beta$<br>coefficient (95% CI) | P     | Multivariable<br>Unstandardized $\beta$<br>coefficient (95% CI) | P               |
| Day/night shift (4 or more nights) | -0.05 (-0.15-0.05)                                            | 0.37  | 0.002 (-0.05-0.05)                                              | 0.93            |
| Age                                | 0.04 (0.04-0.04)                                              | <0.01 | 0.04 (0.04-0.04)                                                | <b>&lt;0.01</b> |
| Country of origin                  |                                                               |       |                                                                 |                 |
| Zimbabwe                           | -0.07 (-0.14--0.00)                                           | 0.04  | 0.01 (-0.04-0.06)                                               | 0.70            |
| South Africa                       | Reference                                                     |       |                                                                 |                 |
| Zambia                             | -0.03 (-0.16-0.10)                                            | 0.67  | 0.04 (-0.03-0.12)                                               | 0.28            |
| Other                              | 0.05 (-0.06-0.16)                                             | 0.38  | 0.02 (-0.04-0.09)                                               | 0.47            |
| Education level                    |                                                               |       |                                                                 |                 |
| Primary school or less             | 0.13 (0.01-0.25)                                              | 0.04  | -0.09 (-0.15--0.02)                                             | <b>&lt;0.01</b> |

| Secondary school          | Reference          |       |                   |                 |
|---------------------------|--------------------|-------|-------------------|-----------------|
| Matrix/college/university | -0.02 (-0.09-0.05) | 0.65  | 0.01 (-0.03-0.04) | 0.73            |
| Stable relationship       | 0.31 (0.20-0.41)   | <0.01 | 0.10 (0.05-0.16)  | <b>&lt;0.01</b> |

| Linear regression                  | Log (ASCVD)                                    |          |                                                |                  |
|------------------------------------|------------------------------------------------|----------|------------------------------------------------|------------------|
|                                    | Univariable                                    |          | Multivariable                                  |                  |
|                                    | Unstandardized $\beta$<br>coefficient (95% CI) | <i>P</i> | Unstandardized $\beta$<br>coefficient (95% CI) | <i>P</i>         |
| Day/night shift (4 or more nights) | -0.04 (-0.11-0.04)                             | 0.35     | 0.00 (-0.04-0.04)                              | 0.99             |
| Age                                | 0.03 (0.03-0.03)                               | <0.01    | 0.03 (0.03-0.03)                               | <b>&lt;0.01</b>  |
| Country of origin                  | Reference                                      |          |                                                |                  |
| Zimbabwe                           | -0.65 (-0.12--0.01)                            | 0.02     | 0.00 (-0.03-0.03)                              | 0.98             |
| South Africa                       | Reference                                      |          |                                                |                  |
| Zambia                             | -0.01 (-0.11-0.09)                             | 0.82     | 0.04 (-0.01-0.09)                              | 0.13             |
| Other                              | 0.04 (-0.05-0.12)                              | 0.37     | 0.01 (-0.03-0.06)                              | 0.57             |
| Education level                    | Reference                                      |          |                                                |                  |
| Primary school or less             | 0.10 (0.01-0.19)                               | 0.03     | -0.07 (-0.12--0.03)                            | <b>&lt; 0.01</b> |
| Secondary school                   | Reference                                      |          |                                                |                  |
| Matrix/college/university          | -0.02 (-0.08-0.03)                             | 0.38     | -0.01 (-0.03-0.02)                             | 0.56             |
| Stable relationship                | 0.22 (0.14-0.30)                               | <0.01    | 0.06 (0.02-0.10)                               | <b>&lt; 0.01</b> |

| Linear regression                  | Log (mean CCA-IMT)                             |          |                                                |                 |
|------------------------------------|------------------------------------------------|----------|------------------------------------------------|-----------------|
|                                    | Univariable                                    |          | Multivariable                                  |                 |
|                                    | Unstandardized $\beta$<br>coefficient (95% CI) | <i>P</i> | Unstandardized $\beta$<br>coefficient (95% CI) | <i>P</i>        |
| Day/night shift (4 or more nights) | -0.05 (-0.14-0.03)                             | 0.21     | -0.02 (-0.07-0.03)                             | 0.39            |
| Age                                | 0.01 (0.004-0.01)                              | <0.01    | 0.03 (0.03-0.03)                               | <b>&lt;0.01</b> |
| Country of origin                  | Reference                                      |          |                                                |                 |
| Zimbabwe                           | -0.01 (-0.04-0.03)                             | 0.74     |                                                |                 |

|                           |                    |        |                   |      |
|---------------------------|--------------------|--------|-------------------|------|
| South Africa              | Reference          |        |                   |      |
| Zambia                    | -0.02 (-0.07-0.01) | 0.24   |                   |      |
| Other                     | -0.04 (-0.05-0.04) | 0.83   |                   |      |
| Education level           |                    |        |                   |      |
| Primary school or less    | 0.01 (-0.01-0.04)  | 0.29   |                   |      |
| Secondary school          | Reference          |        |                   |      |
| Matrix/college/university | -0.01 (-0.03-0.01) | 0.30   |                   |      |
| Stable relationship       | 0.04 (0.01-0.06)   | < 0.01 | 0.05 (-0.01-0.10) | 0.10 |

| Binomial logistic regression       | LVH combined               |          |                              |                 |
|------------------------------------|----------------------------|----------|------------------------------|-----------------|
|                                    | Univariable OR<br>(95% CI) | <i>P</i> | Multivariable OR<br>(95% CI) | <i>P</i>        |
| Day/night shift (4 or more nights) | 0.99 (0.81-1.18)           | 0.95     | 0.93 (0.73-1.28)             | 0.79            |
| Age                                | 0.98 (0.96-1.00)           | 0.03     | 0.99 (0.98-1.00)             | 0.10            |
| Country of origin                  |                            |          |                              |                 |
| Zimbabwe                           | 1.34 (0.86-2.08)           | 0.21     |                              |                 |
| South Africa                       | Reference                  |          |                              |                 |
| Zambia                             | 1.18 (0.55-2.51)           | 0.67     |                              |                 |
| Other                              | 1.15 (0.59-2.24)           | 0.68     |                              |                 |
| Education level                    |                            |          |                              |                 |
| Primary school or less             | 1.36 (0.73-2.52)           | 0.33     |                              |                 |
| Secondary school                   | Reference                  |          |                              |                 |
| Matrix/college/university          | 1.21 (0.83-1.74)           | 0.32     |                              |                 |
| Stable relationship                | 0.37 (0.21-0.64)           | <0.01    | 0.41 (0.28-0.65)             | <b>&lt;0.01</b> |

Appendix 4: Sensitivity analysis. Including only truck drivers working more than 10 years as a truck driver (n=229)

| Linear regression | Log (FRS)                                                     |          |                                                                 |          |
|-------------------|---------------------------------------------------------------|----------|-----------------------------------------------------------------|----------|
|                   | Univariable<br>Unstandardized $\beta$<br>coefficient (95% CI) | <i>P</i> | Multivariable<br>Unstandardized $\beta$<br>coefficient (95% CI) | <i>P</i> |
|                   |                                                               |          |                                                                 |          |

|                           |                     |       |                   |                 |
|---------------------------|---------------------|-------|-------------------|-----------------|
| Day/night shift           | 0.12 (-0.08-0.33)   | 0.24  | 0.06 (-0.06-0.19) | 0.32            |
| Age                       | 0.08 (0.07- 0.09)   | <0.01 | 0.08 (0.07-0.08)  | <b>&lt;0.01</b> |
| Country of origin         |                     |       |                   |                 |
| Zimbabwe                  | -0.42 (-0.69--0.16) | 0.36  |                   |                 |
| South Africa              | Reference           |       |                   |                 |
| Zambia                    | -0.12 (-0.54-0.31)  | 0.59  |                   |                 |
| Other                     | 0.15 (-0.51-0.21)   | 0.41  |                   |                 |
| Education level           |                     |       |                   |                 |
| Primary school or less    | 0.17 (-0.14-0.47)   | 0.28  |                   |                 |
| Secondary school          | Reference           |       |                   |                 |
| Matrix/college/university | 0.18 (-0.05-0.42)   | 0.24  |                   |                 |
| Stable relationship       | 0.59 (0.16-0.1.02)  | 0.07  | 0.27 (0.01-0.54)  | <b>0.04</b>     |

| Linear regression         | Log (ASCVD)                                    |          |                                                |                  |
|---------------------------|------------------------------------------------|----------|------------------------------------------------|------------------|
|                           | Univariable                                    |          | Multivariable                                  |                  |
|                           | Unstandardized $\beta$<br>coefficient (95% CI) | <i>P</i> | Unstandardized $\beta$<br>coefficient (95% CI) | <i>P</i>         |
| Day/night shift           | 0.04 (-0.03-0.11)                              | 0.27     | 0.02 (-0.02-0.06)                              | 0.38             |
| Age                       | 0.03 (0.03-0.03)                               | <0.01    | 0.03 (0.02-0.03)                               | <b>&lt; 0.01</b> |
| Country of origin         |                                                |          |                                                |                  |
| Zimbabwe                  | -0.03 (-0.12--0.01)                            | 0.26     |                                                |                  |
| South Africa              | Reference                                      |          |                                                |                  |
| Zambia                    | -0.01 (-0.15-0.12)                             | 0.75     |                                                |                  |
| Other                     | 0.03 (-0.04-0.14)                              | 0.37     |                                                |                  |
| Education level           |                                                |          |                                                |                  |
| Primary school or less    | 0.08 (0.01-0.11)                               | 0.56     |                                                |                  |
| Secondary school          | Reference                                      |          |                                                |                  |
| Matrix/college/university | -0.03 (-0.07-0.04)                             | 0.34     |                                                |                  |
| Stable relationship       | 0.28 (0.19-0.33)                               | <0.01    | 0.07 (-0.01-0.15)                              | 0.08             |

| Linear regression | Log (mean CCA-IMT) |
|-------------------|--------------------|
|-------------------|--------------------|



|                           | Univariable                                    |          | Multivariable                                  |                 |
|---------------------------|------------------------------------------------|----------|------------------------------------------------|-----------------|
|                           | Unstandardized $\beta$<br>coefficient (95% CI) | <i>P</i> | Unstandardized $\beta$<br>coefficient (95% CI) | <i>P</i>        |
| Day/night shift           | -0.01 (-0.01-0.003)                            | 0.15     | -0.03 (-0.08-0.001)                            | 0.05            |
| Age                       | 0.01 (0.005-0.01)                              | <0.01    | 0.008 (0.005-0.01)                             | <b>&lt;0.01</b> |
| Country of origin         |                                                |          |                                                |                 |
| Zimbabwe                  | -0.02 (-0.05-0.04)                             | 0.72     |                                                |                 |
| South Africa              | Reference                                      |          |                                                |                 |
| Zambia                    | -0.03 (-0.08-0.02)                             | 0.35     |                                                |                 |
| Other                     | -0.05 (-0.06-0.05)                             | 0.77     |                                                |                 |
| Education level           |                                                |          |                                                |                 |
| Primary school or less    | 0.01 (-0.01-0.05)                              | 0.28     |                                                |                 |
| Secondary school          | Reference                                      |          |                                                |                 |
| Matrix/college/university | -0.01 (-0.04-0.01)                             | 0.38     |                                                |                 |
| Stable relationship       | 0.04 (0.01-0.05)                               | < 0.01   | 0.018 (-0.1-0.13)                              | 0.75            |

| Binomial logistic regression | LVH combined               |          |                              |                 |
|------------------------------|----------------------------|----------|------------------------------|-----------------|
|                              | Univariable OR<br>(95% CI) | <i>P</i> | Multivariable OR<br>(95% CI) | <i>P</i>        |
| Day/night shift              | 0.98 (0.73-1.45)           | 0.91     | 0.92 (0.65-1.31)             | 0.78            |
| Age                          | 0.99 (0.97-1.00)           | 0.04     | 0.99 (0.96-1.00)             | 0.08            |
| Country of origin            |                            |          |                              |                 |
| Zimbabwe                     | 1.62 (0.96-2.25)           | 0.25     |                              |                 |
| South Africa                 | Reference                  |          |                              |                 |
| Zambia                       | 1.21 (0.53-2.66)           | 0.75     |                              |                 |
| Other                        | 1.12 (0.54-2.22)           | 0.58     |                              |                 |
| Education level              |                            |          |                              |                 |
| Primary school or less       | 1.36 (0.73-2.52)           | 0.33     |                              |                 |
| Secondary school             | Reference                  |          |                              |                 |
| Matrix/college/university    | 1.21 (0.83-1.74)           | 0.32     |                              |                 |
| Stable relationship          | 0.34 (0.23-0.69)           | <0.01    | 0.51 (0.33-0.84)             | <b>&lt;0.01</b> |
